# Supplementary material
Source: PubMed Central journal article supplement (PMC4334753)

# **Cytotoxic activity of triazole-containing alkyl $\beta$ -D-glucopyranosides on a human T-cell leukemia cell line**

Additional File 1

E. Davis Oldham<sup>a,†</sup>, Larissa M. Nunes<sup>b,†</sup>, Armando Varela-Ramirez<sup>b</sup>, Stephen E. Rankin<sup>c</sup>, Barbara L. Knutson<sup>c</sup>, Renato J. Aguilera<sup>b,\*</sup> and Hans-Joachim Lehmler<sup>d,\*</sup>

<sup>a</sup> Department of Chemistry, University of Mary Washington, 1300 College Avenue, Fredericksburg, VA 22401, USA; <sup>b</sup> Cytometry, Screening and Imaging Core Facility, Border Biomedical Research Center, Department of Biological Sciences, Bioscience Research Building, University of Texas at El Paso, 500 West University Ave., El Paso, TX 79968, USA; <sup>c</sup> Department of Chemical and Materials Engineering, University of Kentucky, Lexington, KY 40506, USA; <sup>d</sup> Department of Occupational and Environmental Health, The University of Iowa, UI Research Park, Iowa City, IA 52242, USA

e-mail: [eoldham@umw.edu](mailto:eoldham@umw.edu); [larissa2rh@gmail.com](mailto:larissa2rh@gmail.com); [avarela2@utep.edu](mailto:avarela2@utep.edu); [stephen.rankin@uky.edu](mailto:stephen.rankin@uky.edu); [bknutson@engr.uky.edu](mailto:bknutson@engr.uky.edu); [raguilera@utep.edu](mailto:raguilera@utep.edu); [hans-joachim-lehmler@uiowa.edu](mailto:hans-joachim-lehmler@uiowa.edu).

\*Corresponding authors:

Hans-Joachim Lehmler: e-mail: [hans-joachim-lehmler@uiowa.edu](mailto:hans-joachim-lehmler@uiowa.edu)

Renato J. Aguilera: e-mail [raguilera@utep.edu](mailto:raguilera@utep.edu)

† Authors contributed equally to this work

## Table of Contents

|                                                                                                                                                                                                          |              |
|----------------------------------------------------------------------------------------------------------------------------------------------------------------------------------------------------------|--------------|
| Atom numbering scheme of triazole-containing alkyl $\beta$ -D-glucopyranosides <b>3</b> and <b>4</b>                                                                                                     | <b>4</b>     |
| $^1\text{H}$ NMR spectrum of triacetyl propargyl glucose ( <b>2</b> )                                                                                                                                    | <b>5</b>     |
| $^{13}\text{C}$ NMR spectrum of triacetyl propargyl glucose ( <b>2</b> )                                                                                                                                 | <b>6</b>     |
| $^1\text{H}$ NMR spectrum of (1-octyl-1 <i>H</i> -1,2,3-triazol-4-yl)methyl 2,3,4-tri- <i>O</i> -acetyl- $\beta$ -glucopyranoside ( <b>3a</b> )                                                          | <b>7</b>     |
| $^{13}\text{C}$ NMR spectrum of (1-octyl-1 <i>H</i> -1,2,3-triazol-4-yl)methyl 2,3,4-tri- <i>O</i> -acetyl- $\beta$ -glucopyranoside ( <b>3a</b> )                                                       | <b>8</b>     |
| $^1\text{H}$ NMR spectrum of (1-decyl-1 <i>H</i> -1,2,3-triazol-4-yl)methyl 2,3,4-tri- <i>O</i> -acetyl- $\beta$ -glucopyranoside ( <b>3b</b> )                                                          | <b>9</b>     |
| $^{13}\text{C}$ NMR spectrum of (1-decyl-1 <i>H</i> -1,2,3-triazol-4-yl)methyl 2,3,4-tri- <i>O</i> -acetyl- $\beta$ -glucopyranoside ( <b>3b</b> )                                                       | <b>10</b>    |
| HH COSY of (1-decyl-1 <i>H</i> -1,2,3-triazol-4-yl)methyl 2,3,4-tri- <i>O</i> -acetyl- $\beta$ -glucopyranoside ( <b>3b</b> )                                                                            | <b>11-12</b> |
| $^1\text{H}$ NMR spectrum of (1-dodecyl-1 <i>H</i> -1,2,3-triazol-4-yl)methyl 2,3,4-tri- <i>O</i> -acetyl- $\beta$ -glucopyranoside ( <b>3c</b> )                                                        | <b>13</b>    |
| $^{13}\text{C}$ NMR spectrum of (1-dodecyl-1 <i>H</i> -1,2,3-triazol-4-yl)methyl 2,3,4-tri- <i>O</i> -acetyl- $\beta$ -glucopyranoside ( <b>3c</b> )                                                     | <b>14</b>    |
| $^1\text{H}$ NMR spectrum of (1-tetradecyl-1 <i>H</i> -1,2,3-triazol-4-yl)methyl 2,3,4-tri- <i>O</i> -acetyl- $\beta$ -glucopyranoside ( <b>3d</b> )                                                     | <b>15</b>    |
| $^{13}\text{C}$ NMR spectrum of (1-tetradecyl-1 <i>H</i> -1,2,3-triazol-4-yl)methyl 2,3,4-tri- <i>O</i> -acetyl- $\beta$ -glucopyranoside ( <b>3d</b> )                                                  | <b>16</b>    |
| $^1\text{H}$ NMR spectrum of (1-hexadecyl-1 <i>H</i> -1,2,3-triazol-4-yl)methyl 2,3,4-tri- <i>O</i> -acetyl- $\beta$ -glucopyranoside ( <b>3e</b> )                                                      | <b>17</b>    |
| $^{13}\text{C}$ NMR spectrum of (1-hexadecyl-1 <i>H</i> -1,2,3-triazol-4-yl)methyl 2,3,4-tri- <i>O</i> -acetyl- $\beta$ -glucopyranoside ( <b>3e</b> )                                                   | <b>18</b>    |
| $^1\text{H}$ NMR spectrum of (1-(3,3,4,4,5,5,6,6,7,7,8,8,8-tridecafluorooctyl)-1 <i>H</i> -1,2,3-triazol-4-yl)methyl 2,3,4-tri- <i>O</i> -acetyl- $\beta$ -glucopyranoside ( <b>3f</b> )                 | <b>19</b>    |
| $^{13}\text{C}$ NMR spectrum of (1-(3,3,4,4,5,5,6,6,7,7,8,8,8-tridecafluorooctyl)-1 <i>H</i> -1,2,3-triazol-4-yl)methyl 2,3,4-tri- <i>O</i> -acetyl- $\beta$ -glucopyranoside ( <b>3f</b> )              | <b>20</b>    |
| $^1\text{H}$ NMR spectrum of (1-(3,3,4,4,5,5,6,6,7,7,8,8,9,9,10,10,10-heptadecafluorodecyl)-1 <i>H</i> -1,2,3-triazol-4-yl)methyl 2,3,4-tri- <i>O</i> -acetyl- $\beta$ -glucopyranoside ( <b>3g</b> )    | <b>21</b>    |
| $^{13}\text{C}$ NMR spectrum of (1-(3,3,4,4,5,5,6,6,7,7,8,8,9,9,10,10,10-heptadecafluorodecyl)-1 <i>H</i> -1,2,3-triazol-4-yl)methyl 2,3,4-tri- <i>O</i> -acetyl- $\beta$ -glucopyranoside ( <b>3g</b> ) | <b>22</b>    |

|                                                                                                                                                               |    |
|---------------------------------------------------------------------------------------------------------------------------------------------------------------|----|
| <sup>1</sup> H NMR spectrum of (1-octyl-1 <i>H</i> -1,2,3-triazol-4-yl)methyl β-D-glucopyranoside (4a)                                                        | 23 |
| <sup>13</sup> C NMR spectrum of (1-octyl-1 <i>H</i> -1,2,3-triazol-4-yl)methyl β-D-glucopyranoside (4a)                                                       | 24 |
| <sup>1</sup> H NMR spectrum of (1-decyl-1 <i>H</i> -1,2,3-triazol-4-yl)methyl β-D-glucopyranoside (4b)                                                        | 25 |
| <sup>13</sup> C NMR spectrum of (1-decyl-1 <i>H</i> -1,2,3-triazol-4-yl)methyl β-D-glucopyranoside (4b)                                                       | 26 |
| <sup>1</sup> H NMR spectrum of (1-dodecyl-1 <i>H</i> -1,2,3-triazol-4-yl)methyl β-D-glucopyranoside (4c)                                                      | 27 |
| <sup>13</sup> C NMR spectrum of (1-dodecyl-1 <i>H</i> -1,2,3-triazol-4-yl)methyl β-D-glucopyranoside (4c)                                                     | 28 |
| <sup>1</sup> H NMR spectrum of (1-tetradecyl-1 <i>H</i> -1,2,3-triazol-4-yl)methyl β-D-glucopyranoside (4d)                                                   | 29 |
| <sup>13</sup> C NMR spectrum of (1-tetradecyl-1 <i>H</i> -1,2,3-triazol-4-yl)methyl β-D-glucopyranoside (4d)                                                  | 30 |
| <sup>1</sup> H NMR spectrum of (1-hexadecyl-1 <i>H</i> -1,2,3-triazol-4-yl)methyl β-D-glucopyranoside (4e)                                                    | 31 |
| <sup>13</sup> C NMR spectrum of (1-hexadecyl-1 <i>H</i> -1,2,3-triazol-4-yl)methyl β-D-glucopyranoside (4e)                                                   | 32 |
| <sup>1</sup> H NMR spectrum of (1-(3,3,4,4,5,5,6,6,7,7,8,8,8-tridecafluorooctyl)-1 <i>H</i> -1,2,3-triazol-4-yl)methyl β-D-glucopyranoside (4f)               | 33 |
| <sup>13</sup> C NMR spectrum of (1-(3,3,4,4,5,5,6,6,7,7,8,8,8-tridecafluorooctyl)-1 <i>H</i> -1,2,3-triazol-4-yl)methyl β-D-glucopyranoside (4f)              | 34 |
| <sup>1</sup> H NMR spectrum of (1-(3,3,4,4,5,5,6,6,7,7,8,8,9,9,10,10,10-heptadecafluorodecyl)-1 <i>H</i> -1,2,3-triazol-4-yl)methyl β-D-glucopyranoside (4g)  | 35 |
| <sup>13</sup> C NMR spectrum of (1-(3,3,4,4,5,5,6,6,7,7,8,8,9,9,10,10,10-heptadecafluorodecyl)-1 <i>H</i> -1,2,3-triazol-4-yl)methyl β-D-glucopyranoside (4g) | 36 |

Atom numbering scheme of triazole-containing alkyl  $\beta$ -D-glucoopyranosides 3 and 4

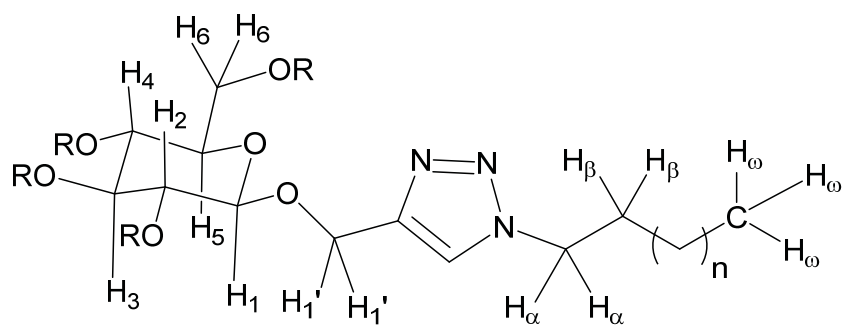

**3a-g:** R = OAc

**4a-g:** R = H

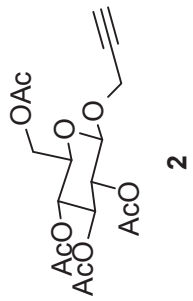

2

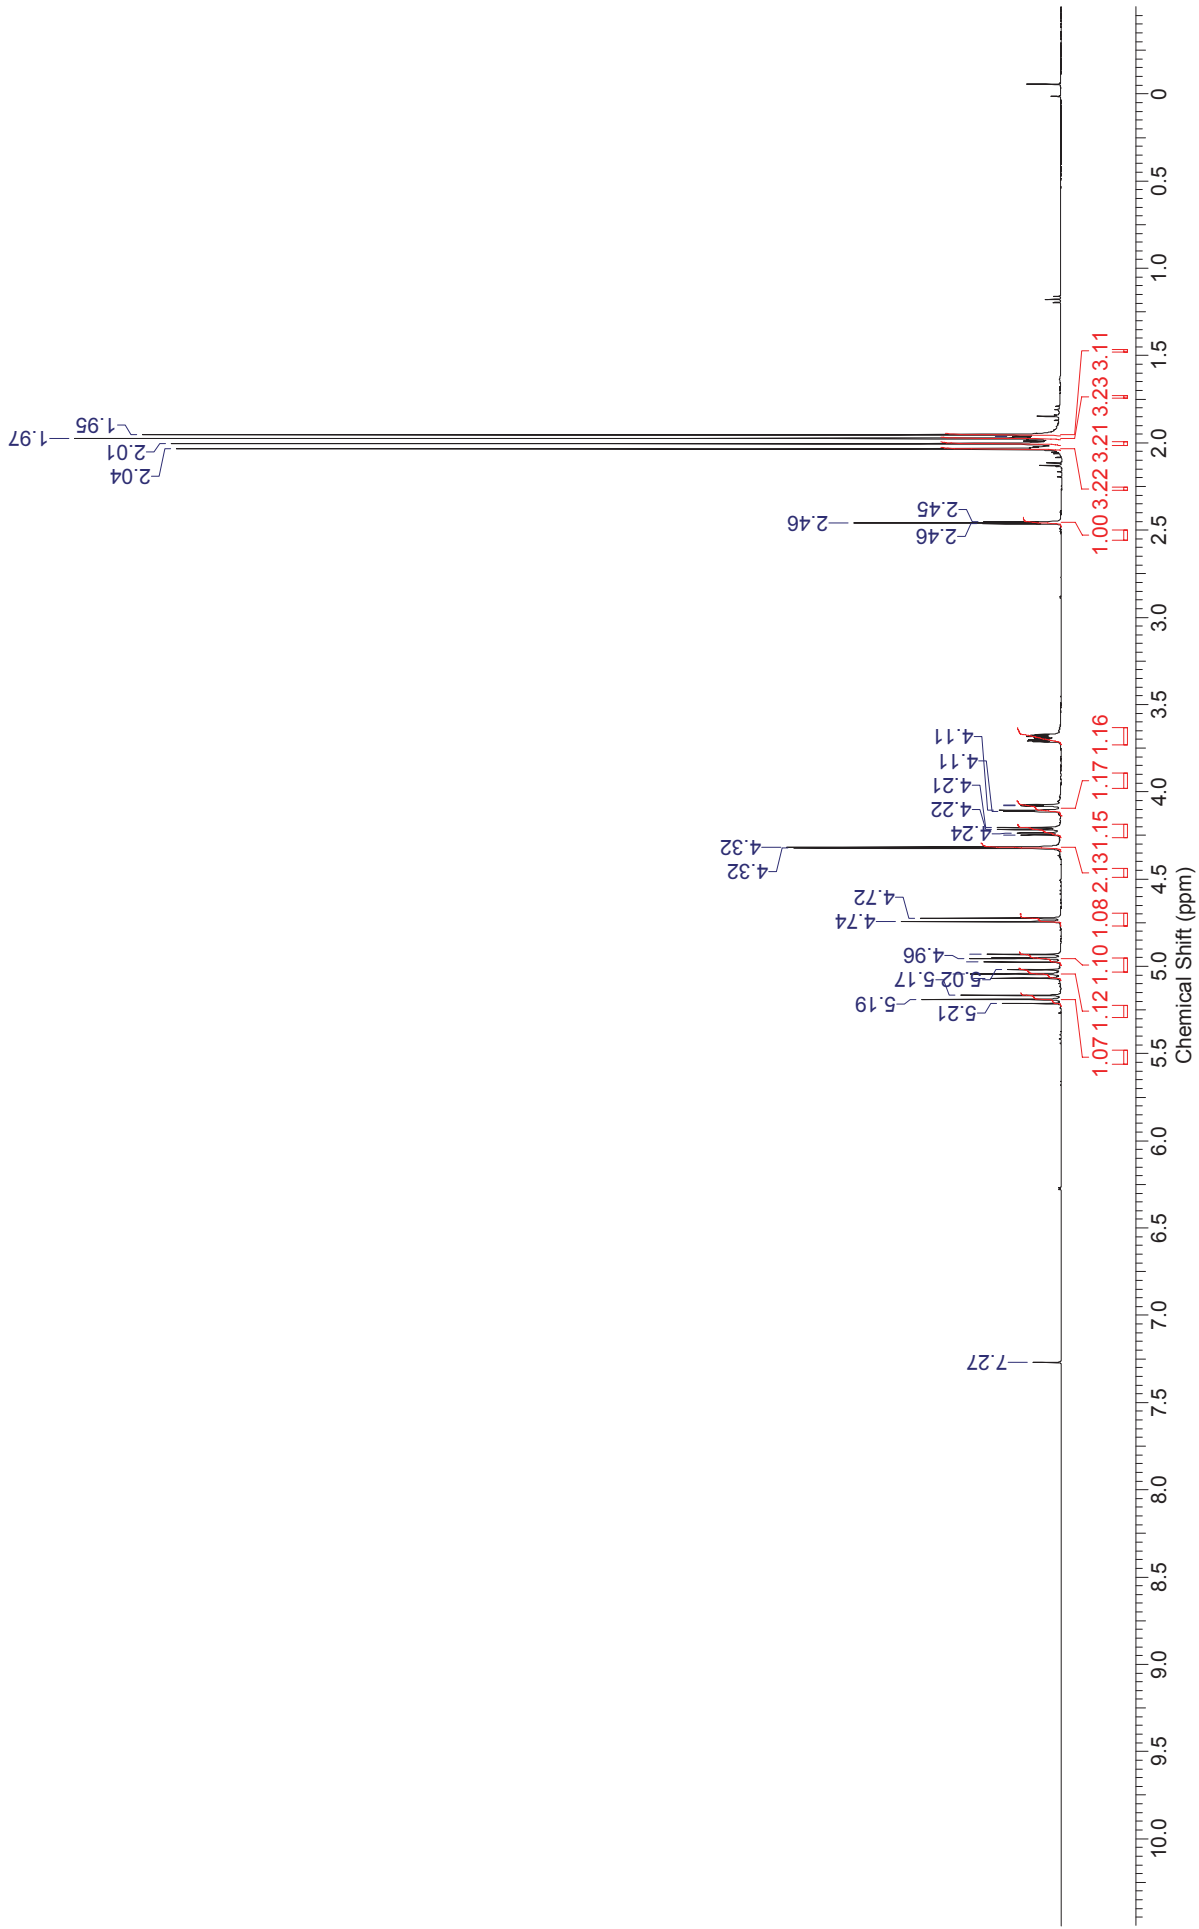

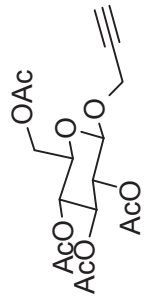

2

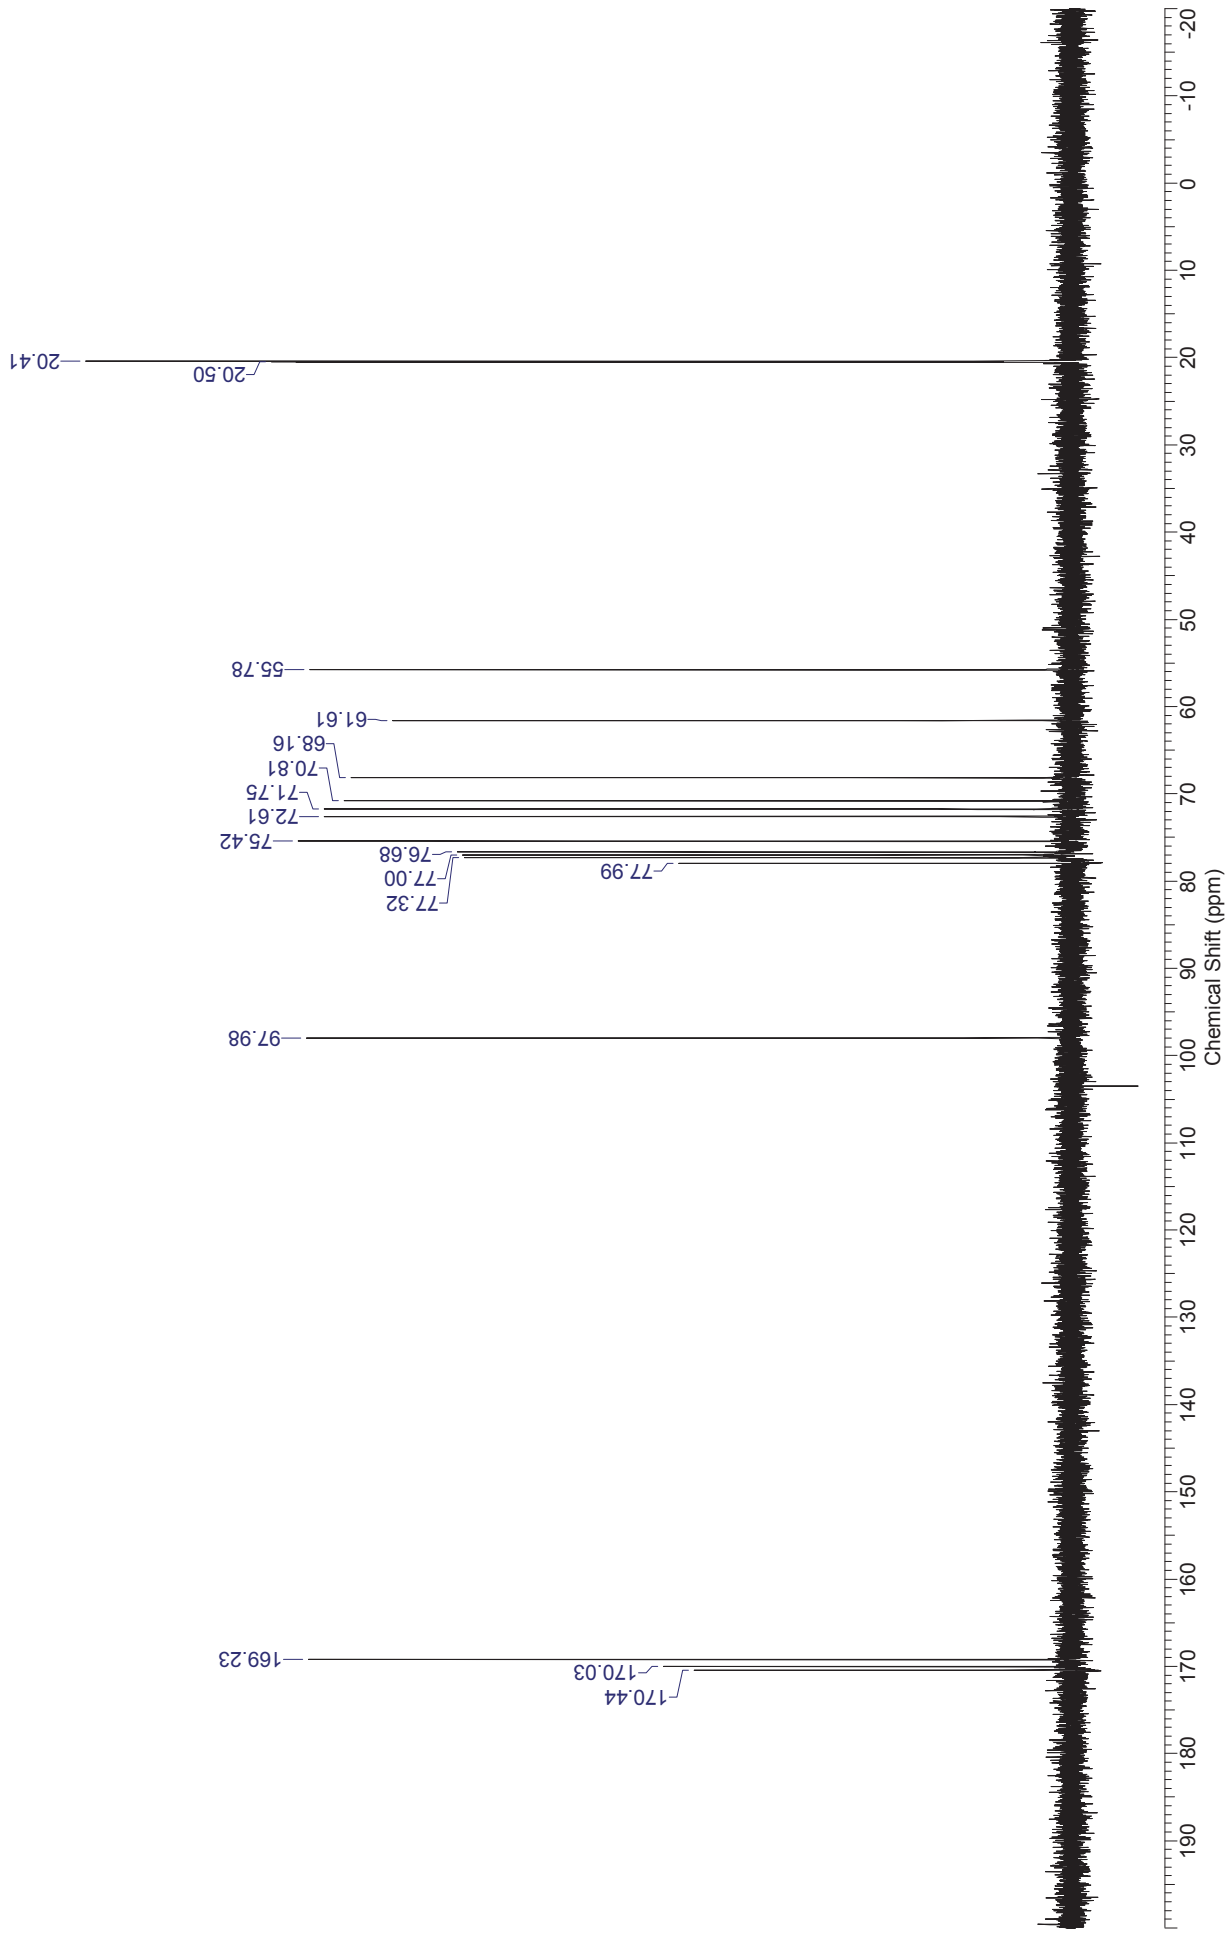

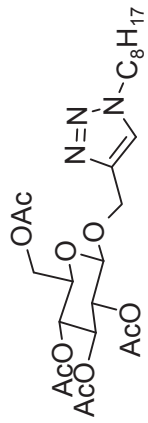

3a

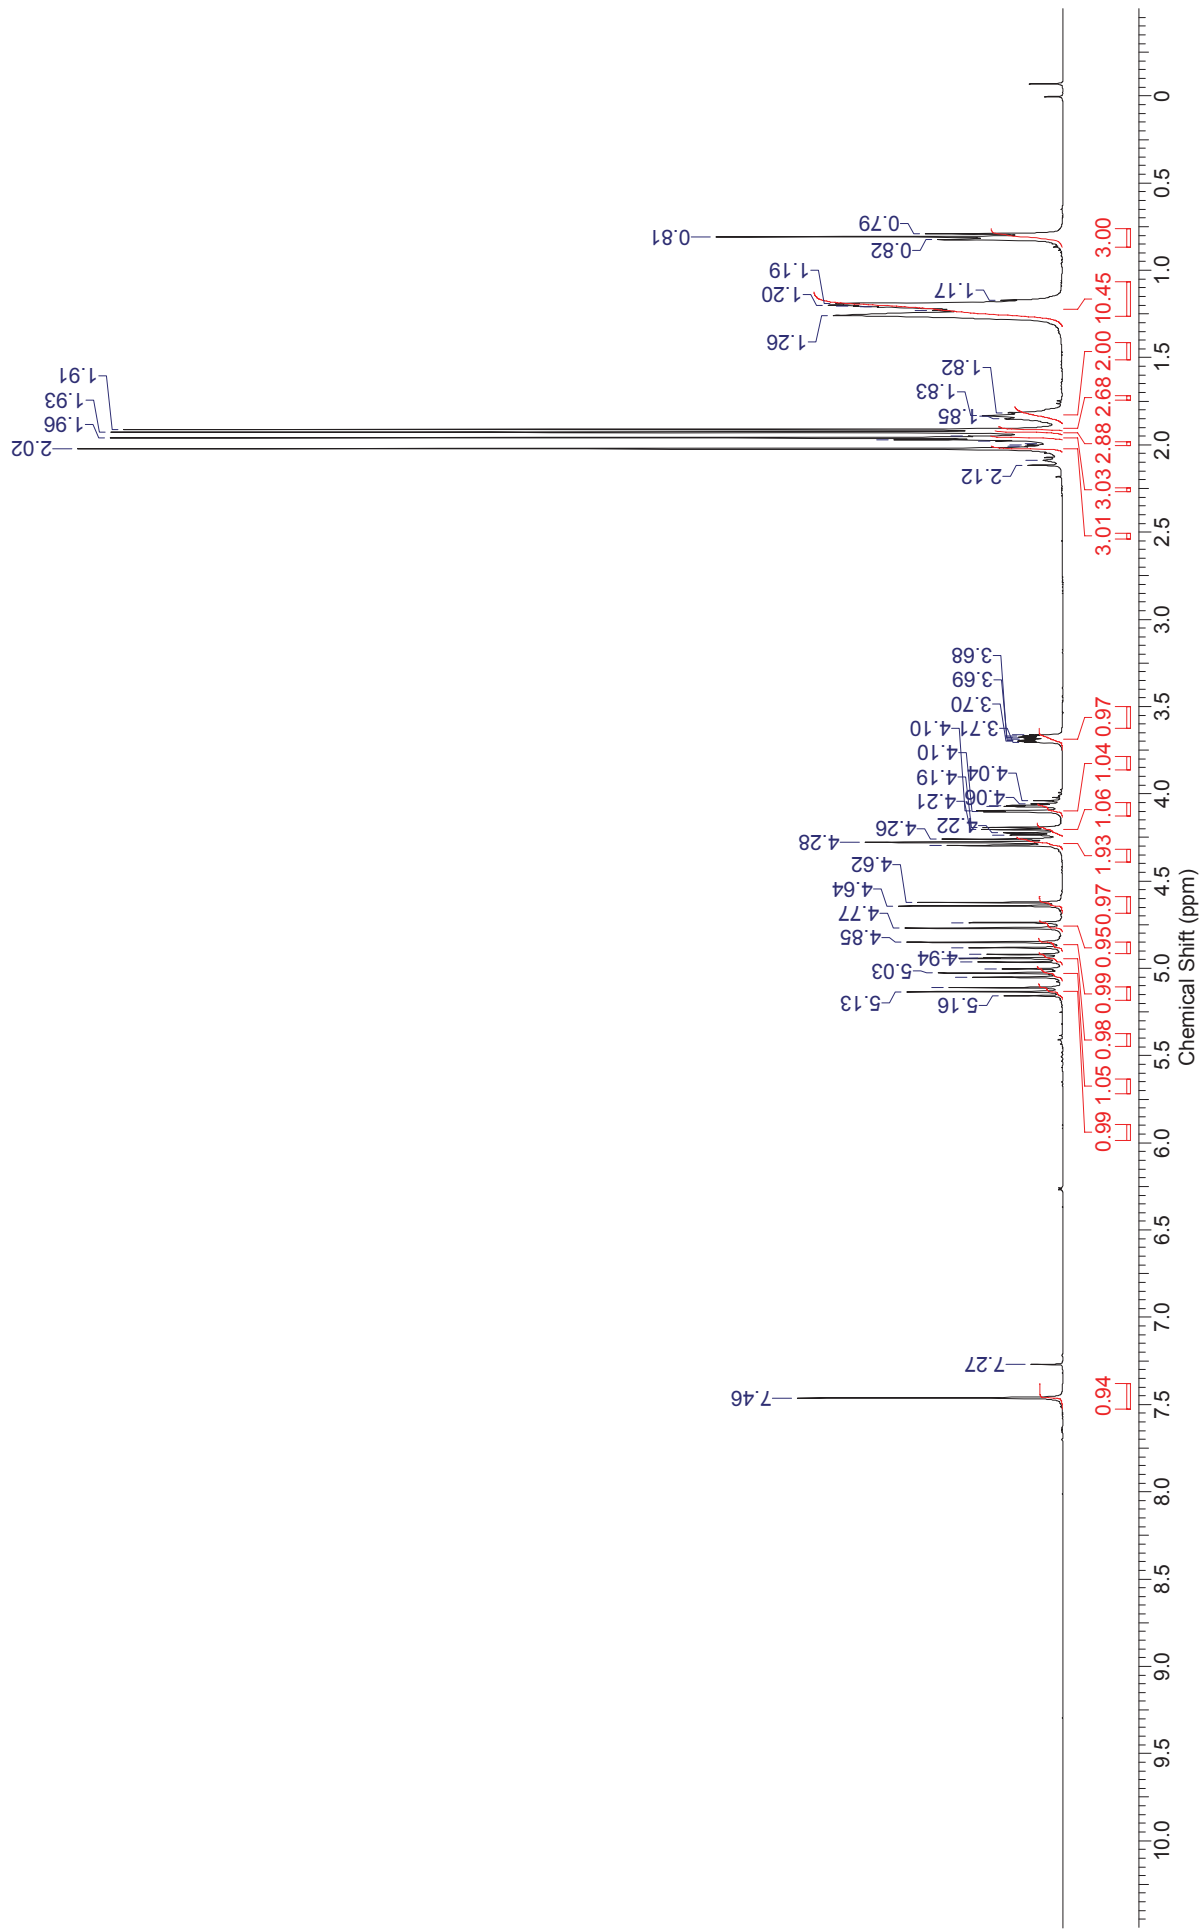

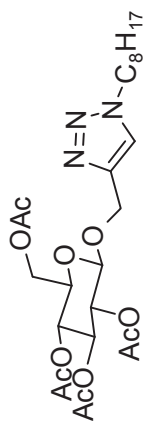

3a

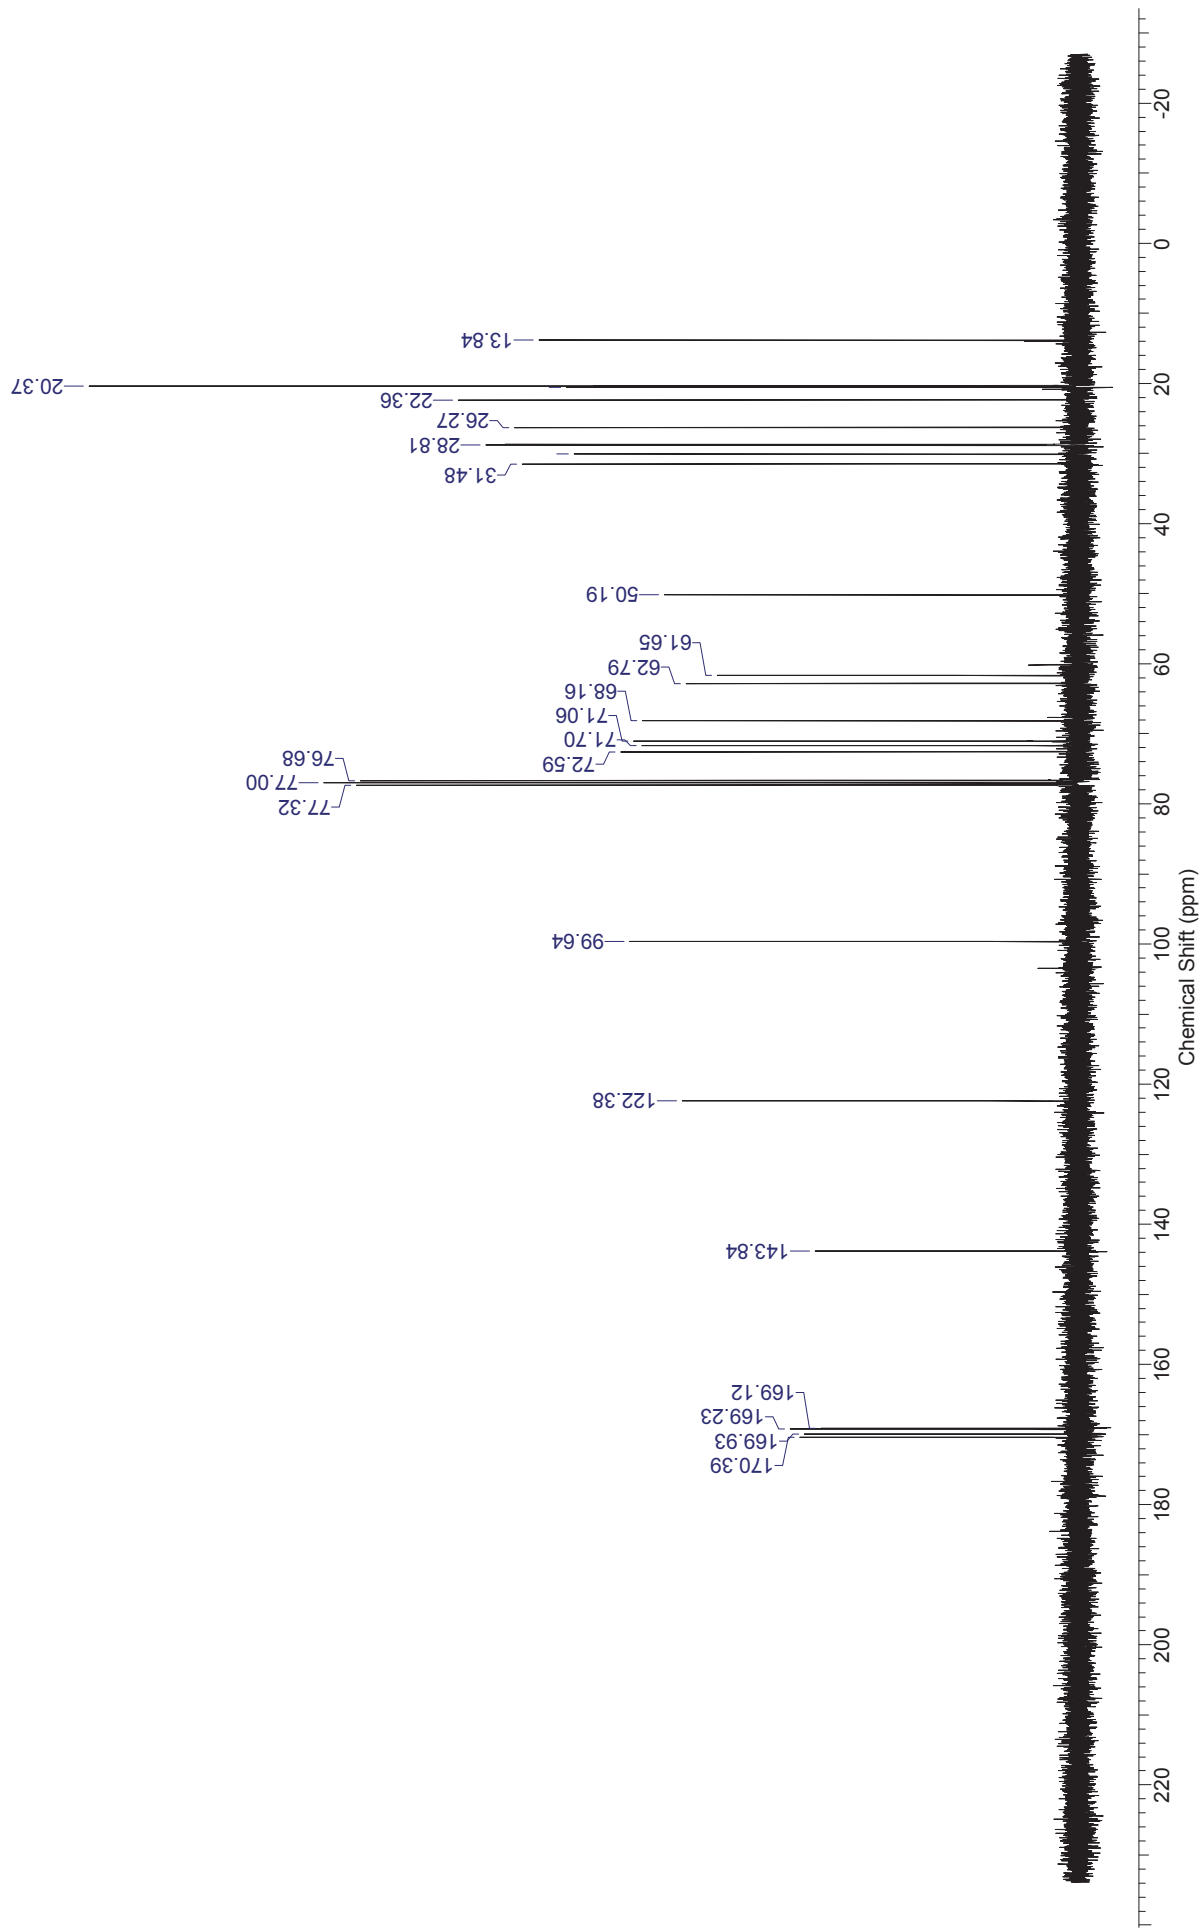



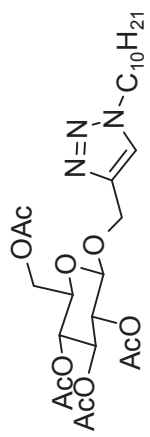

**3b**

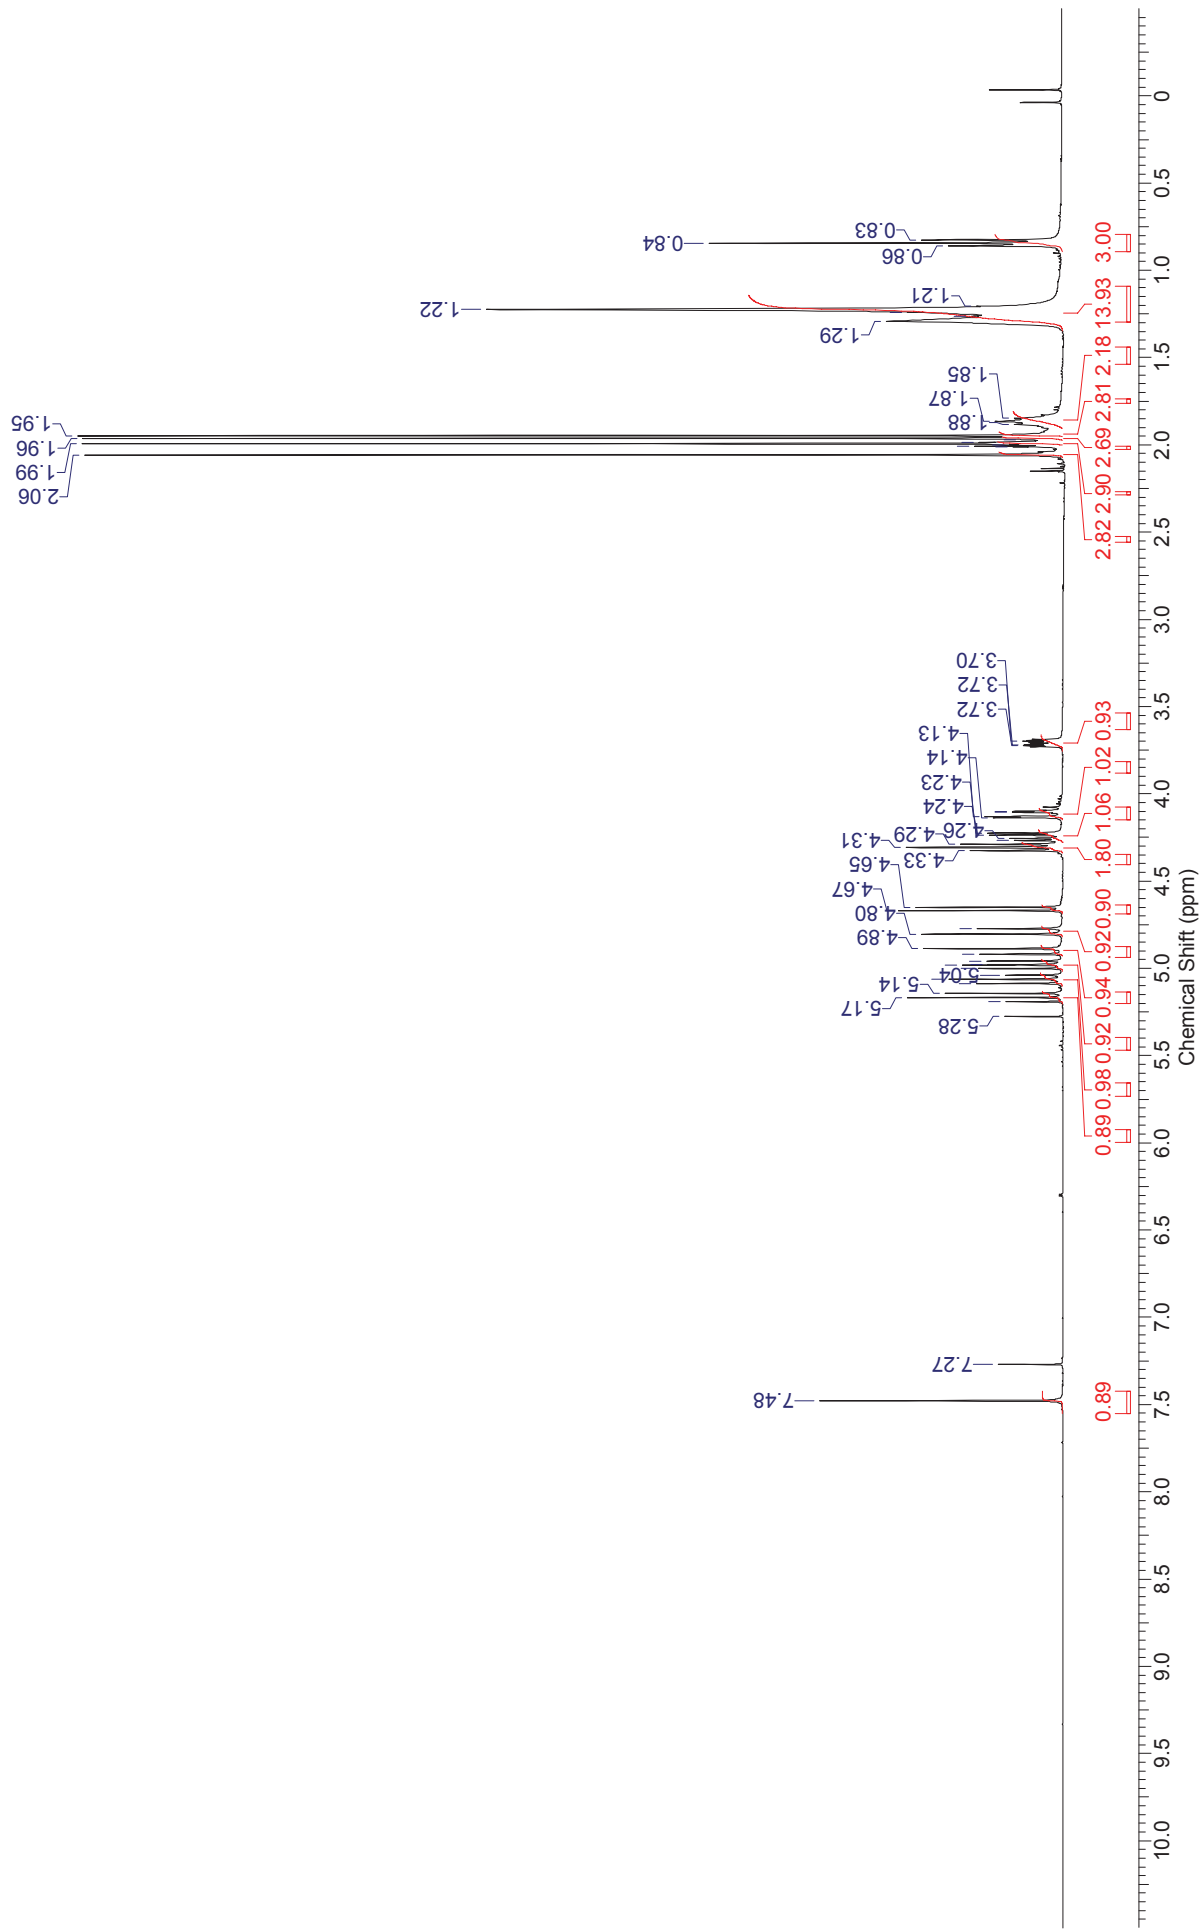

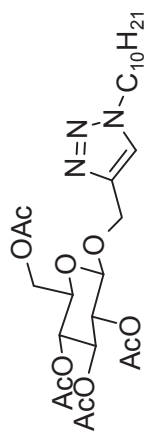

**3b**

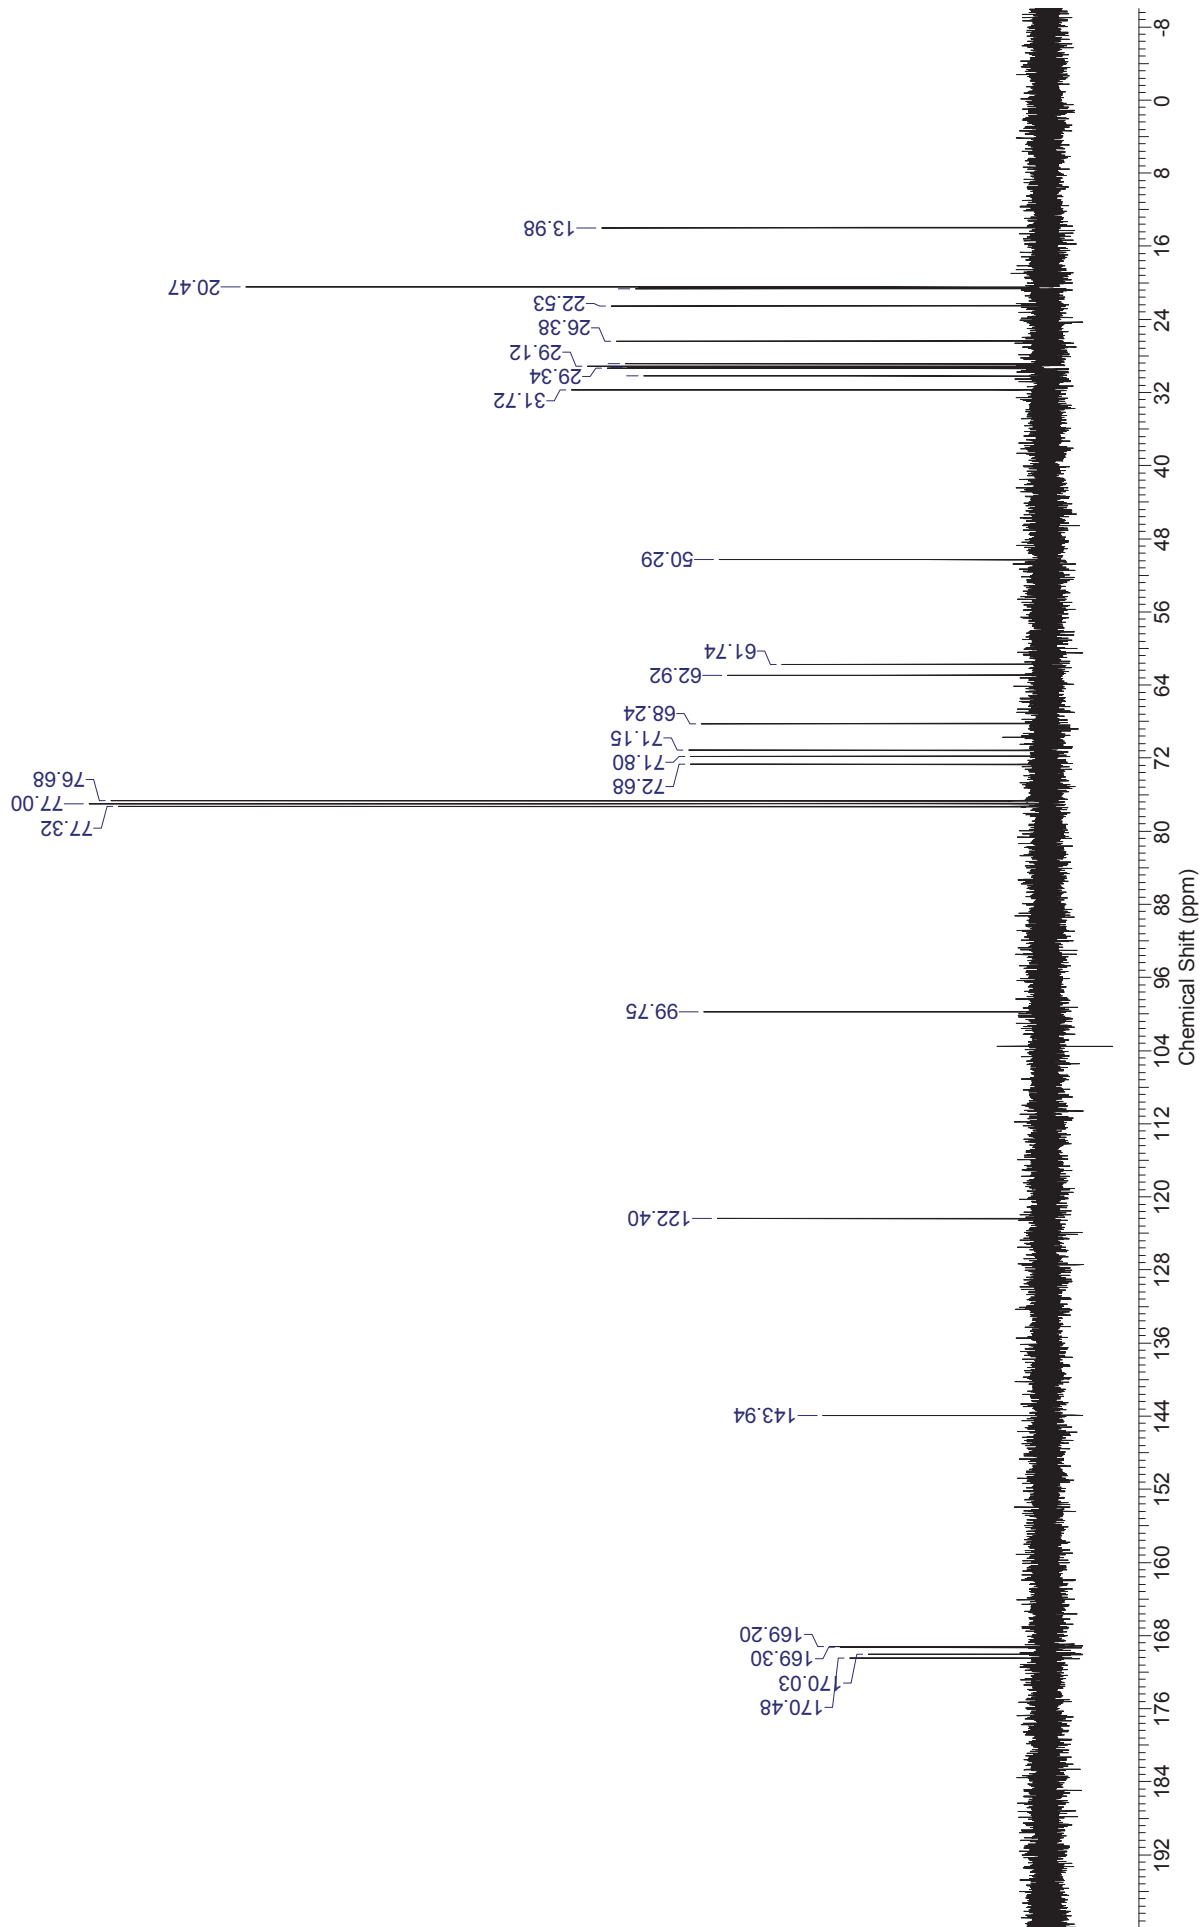

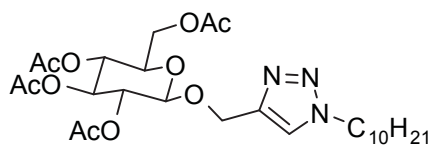

**3b**

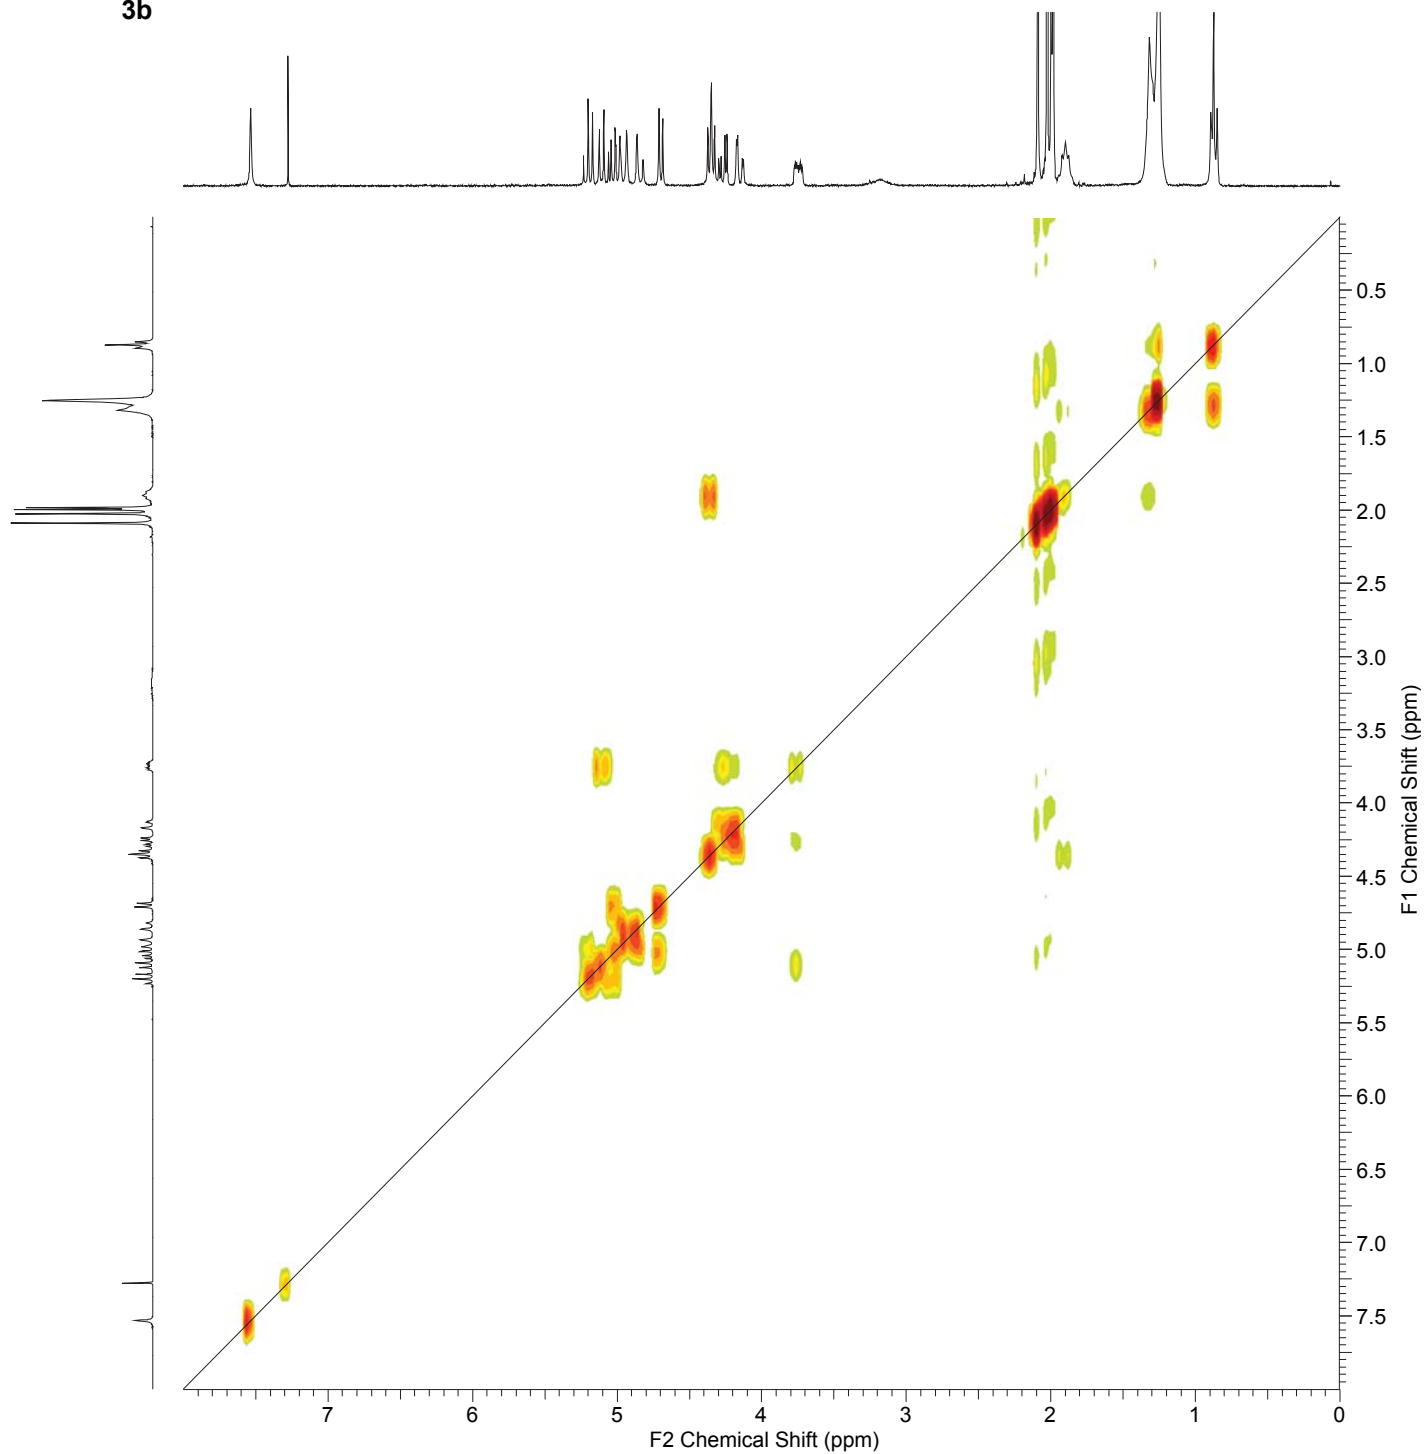

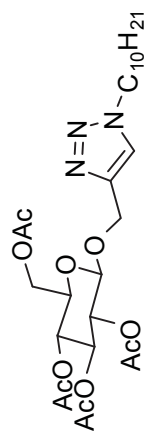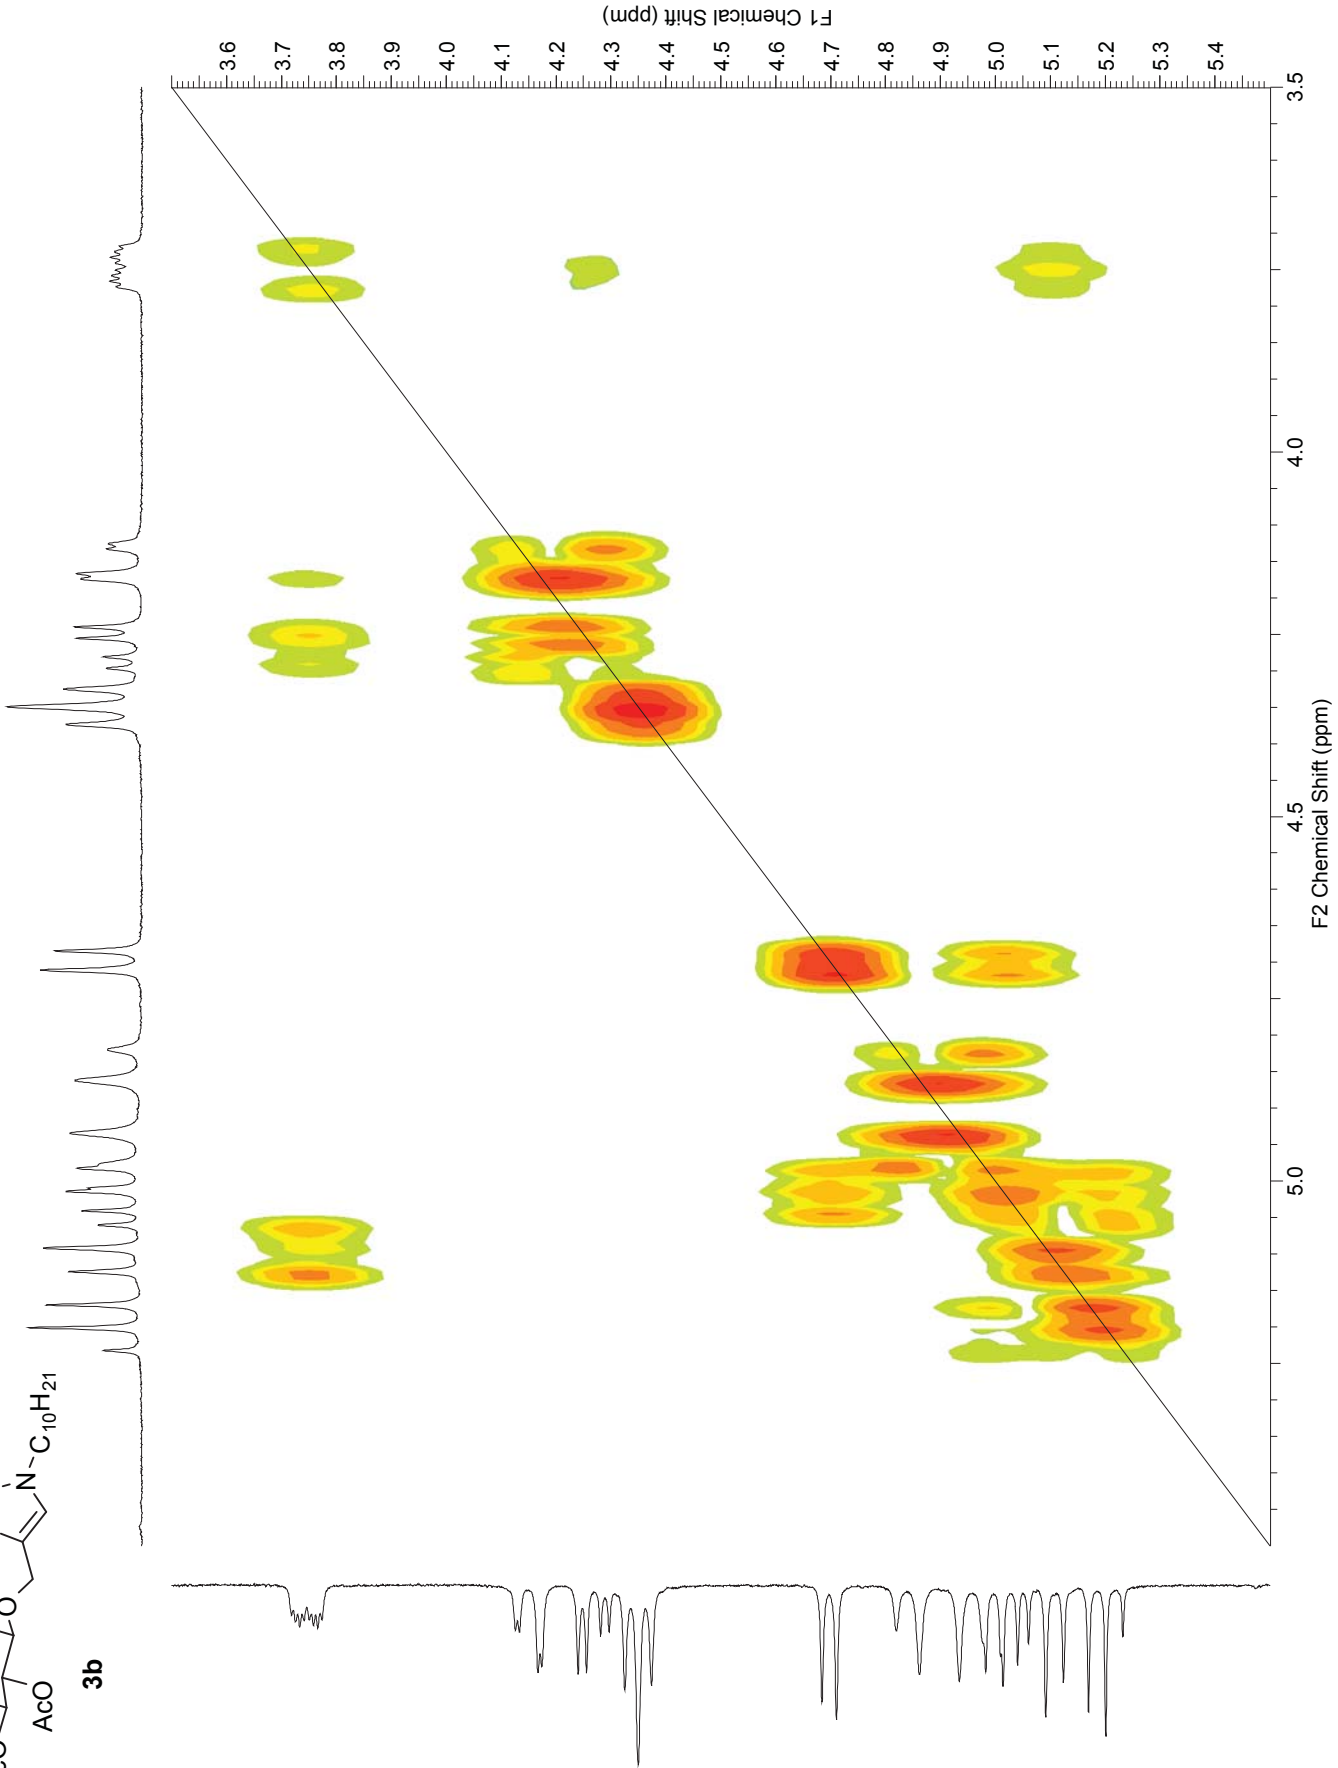

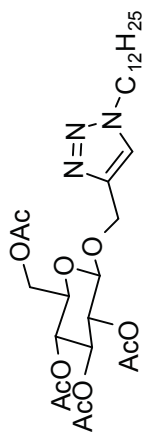

**3c**

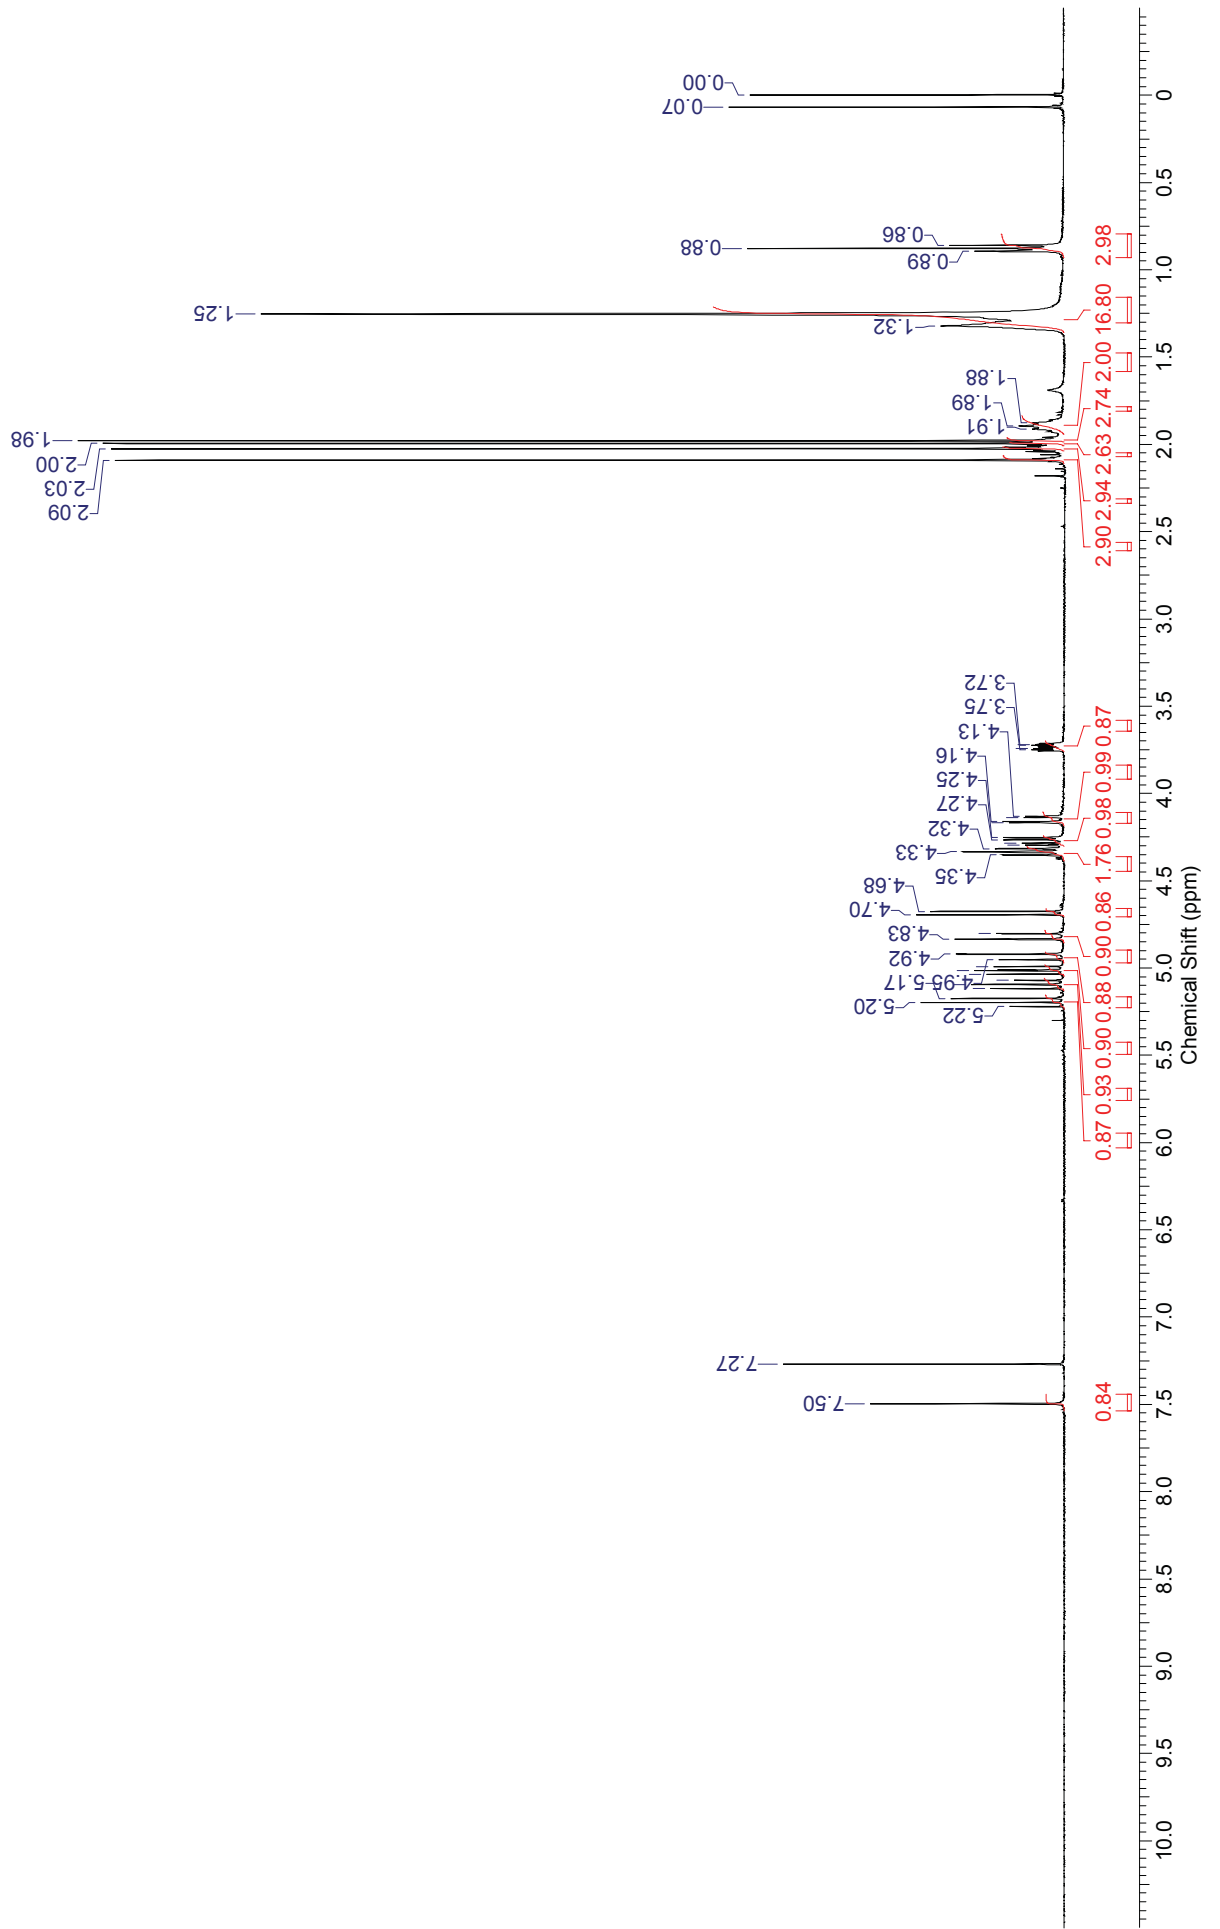

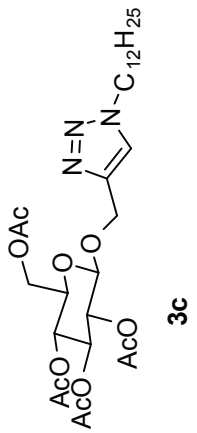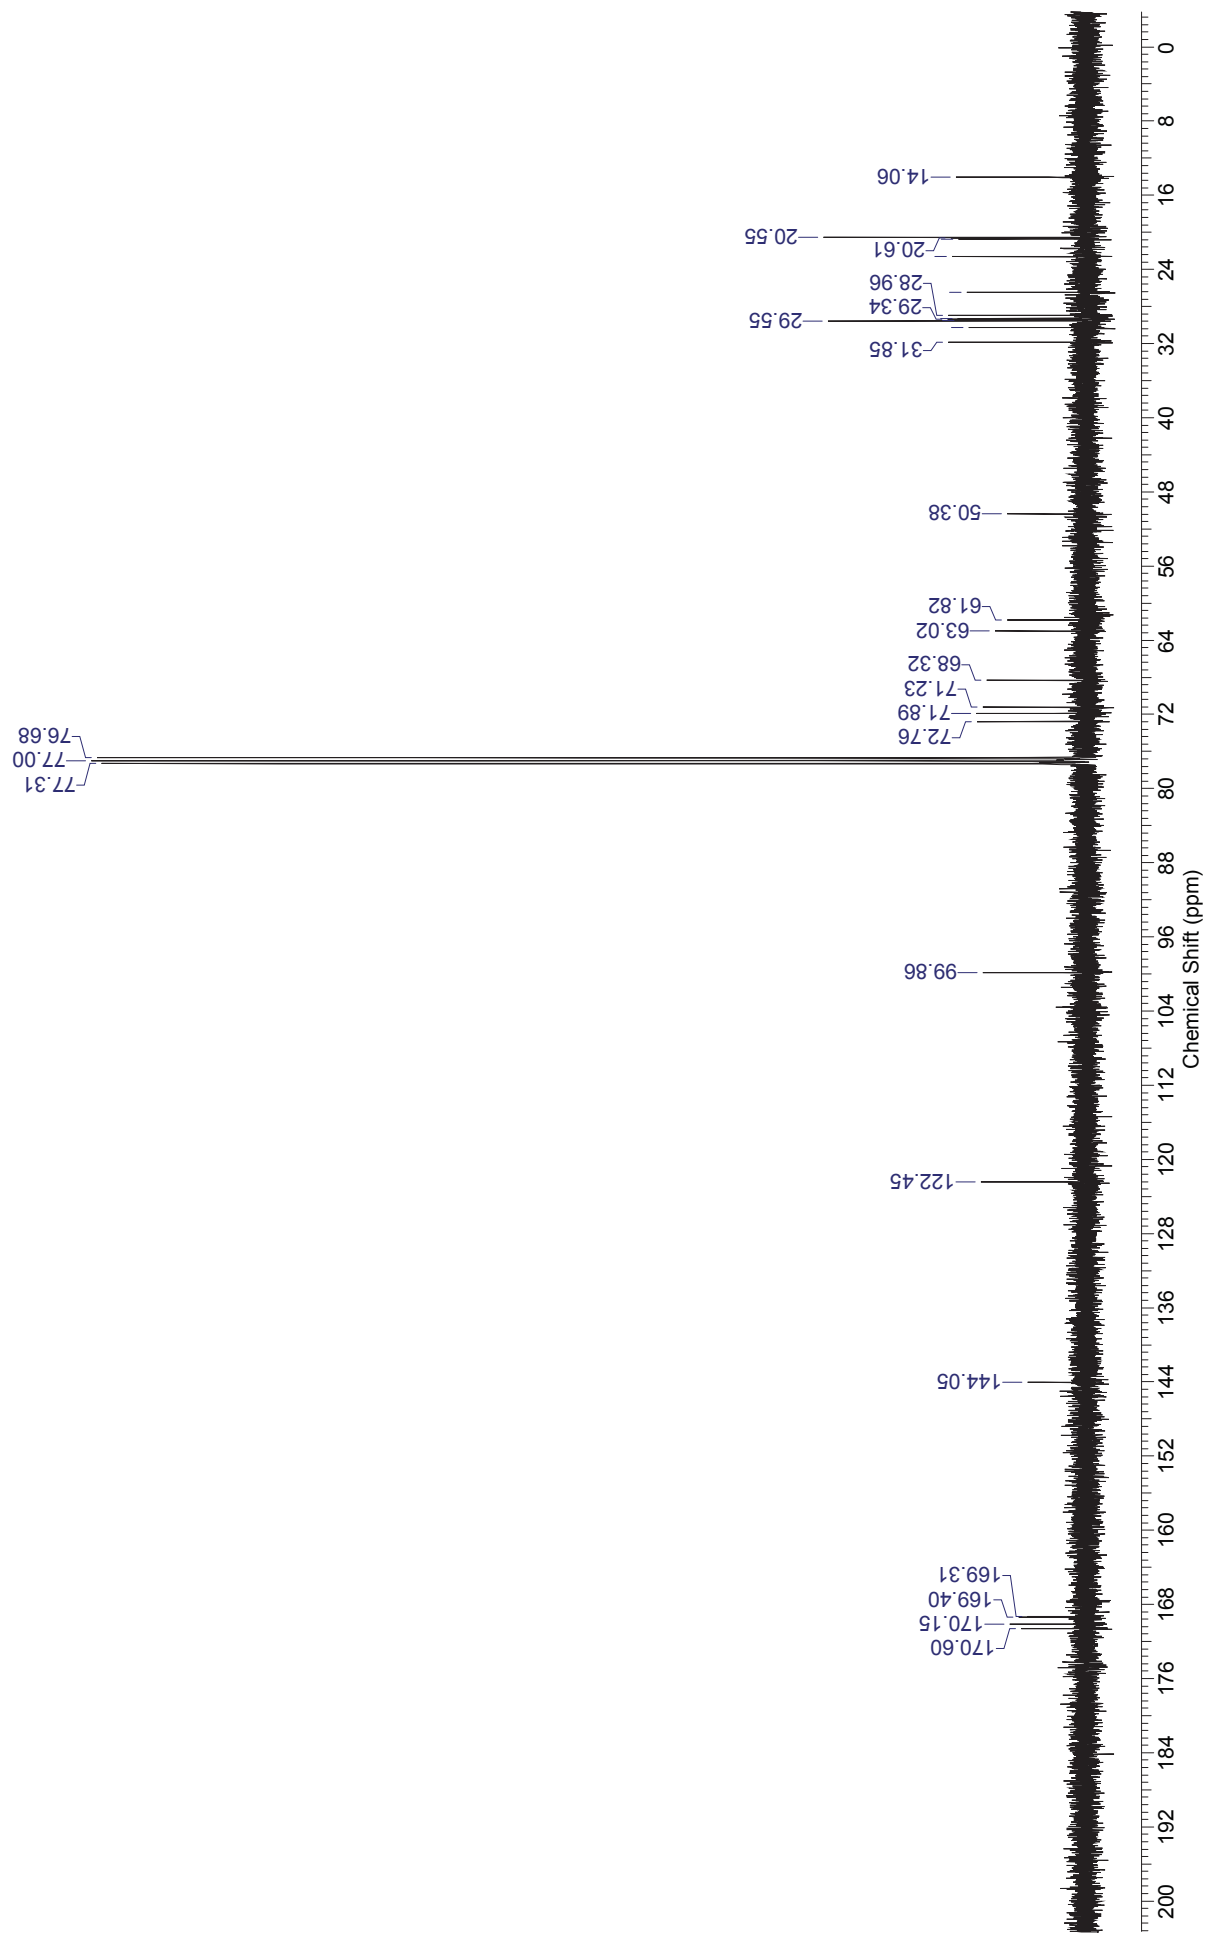

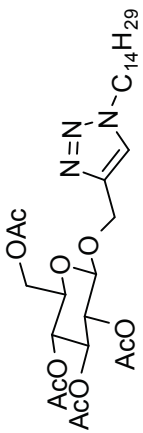

**3d**

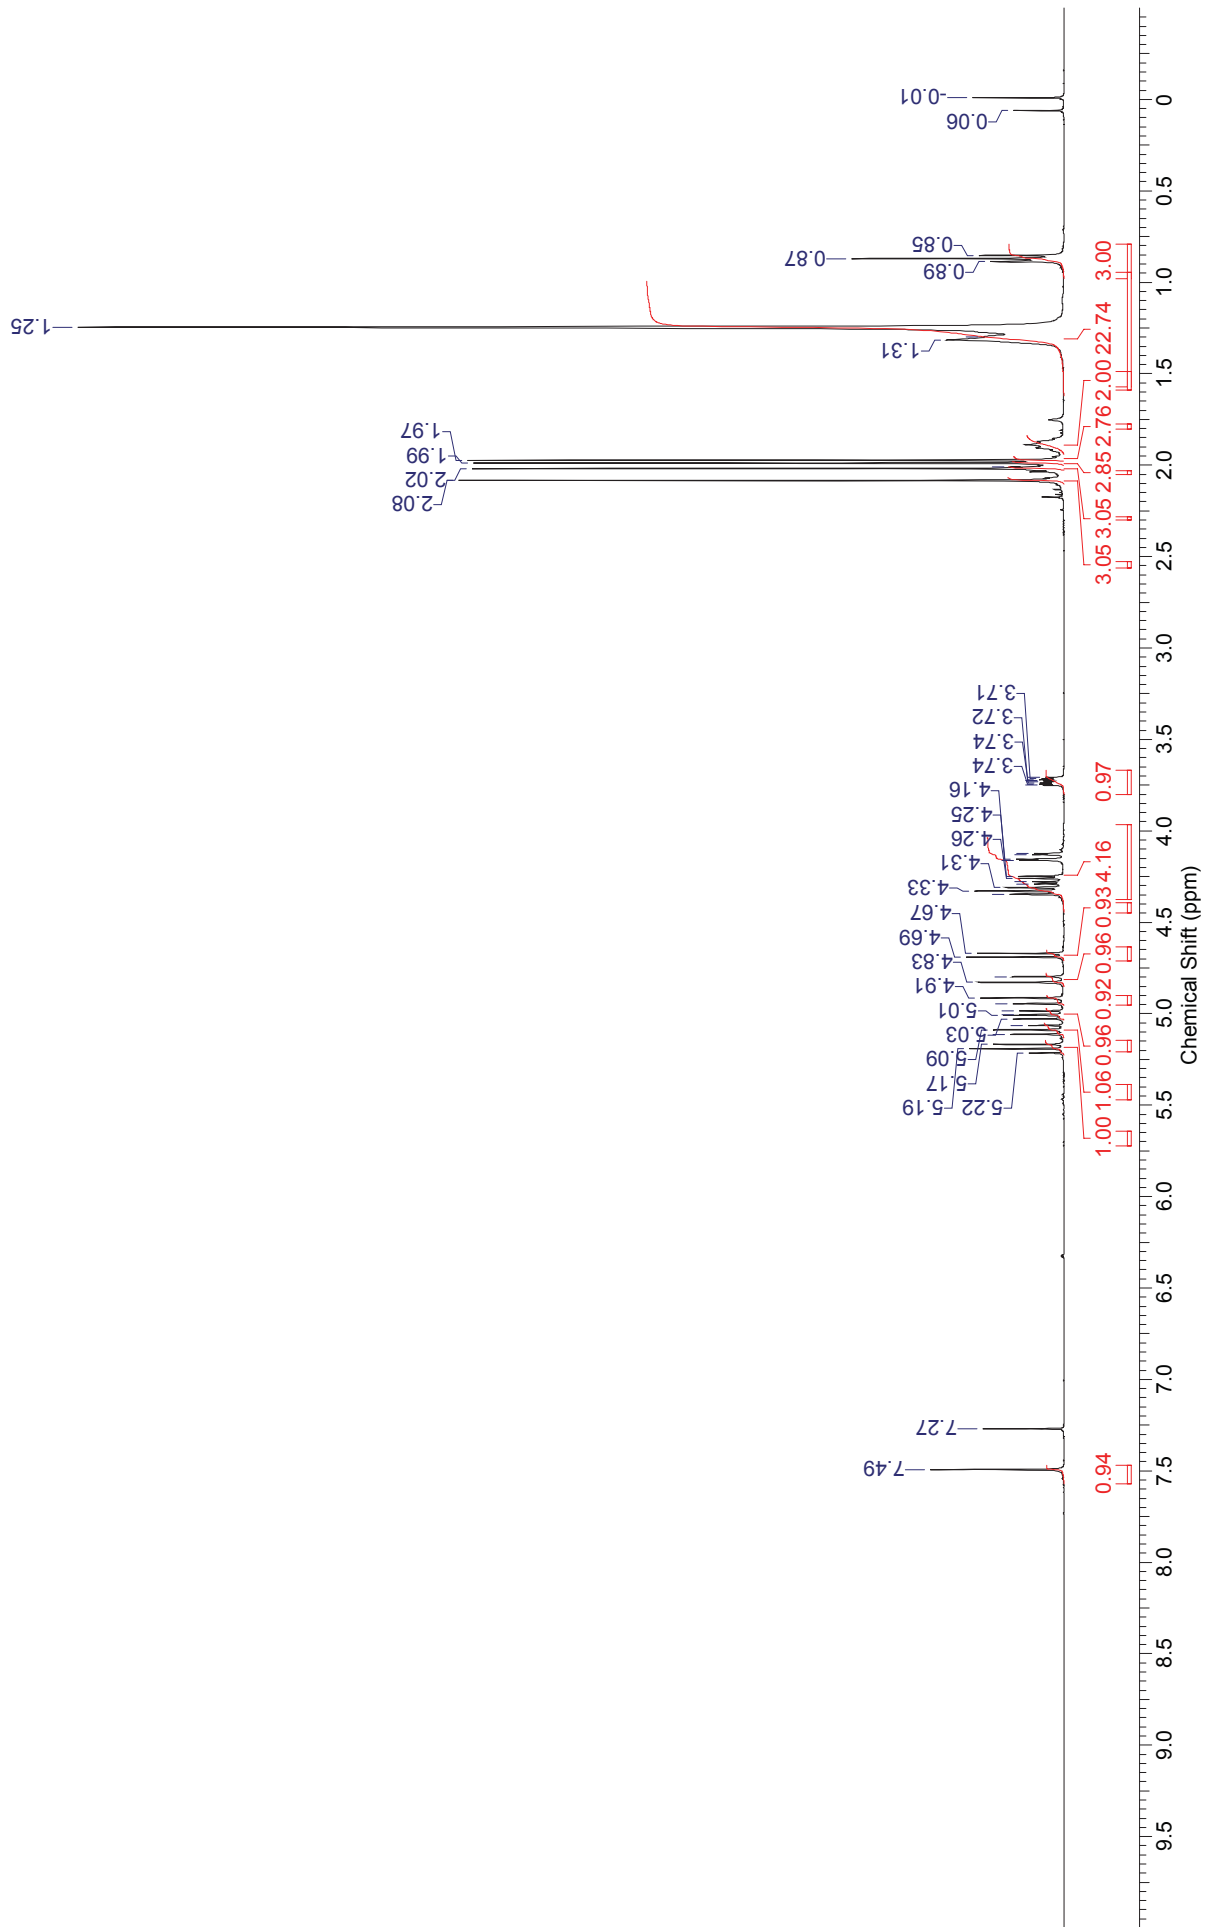

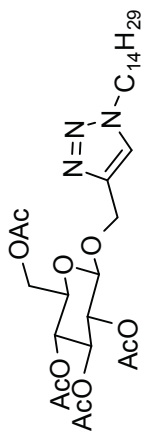

3d

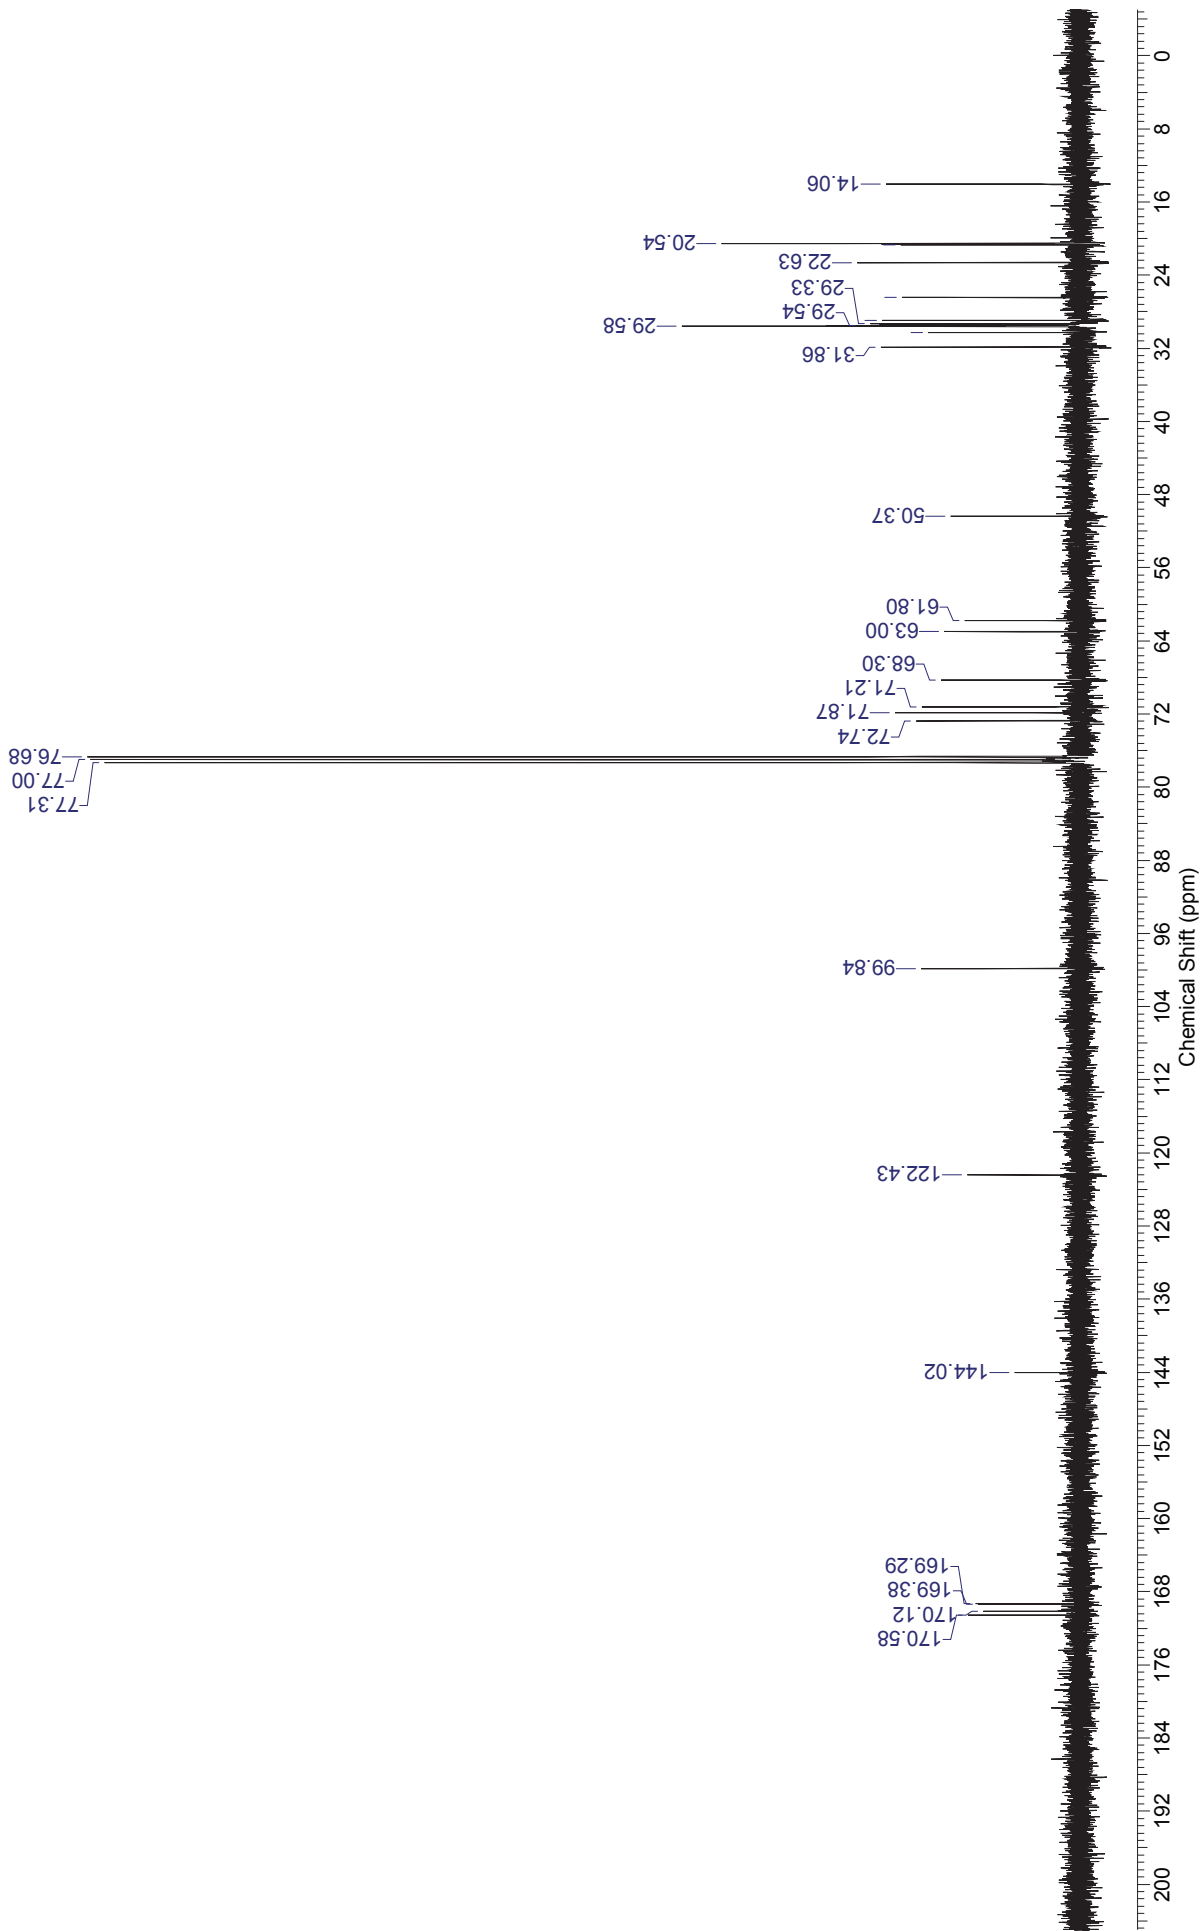



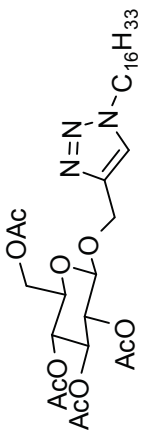

**3e**

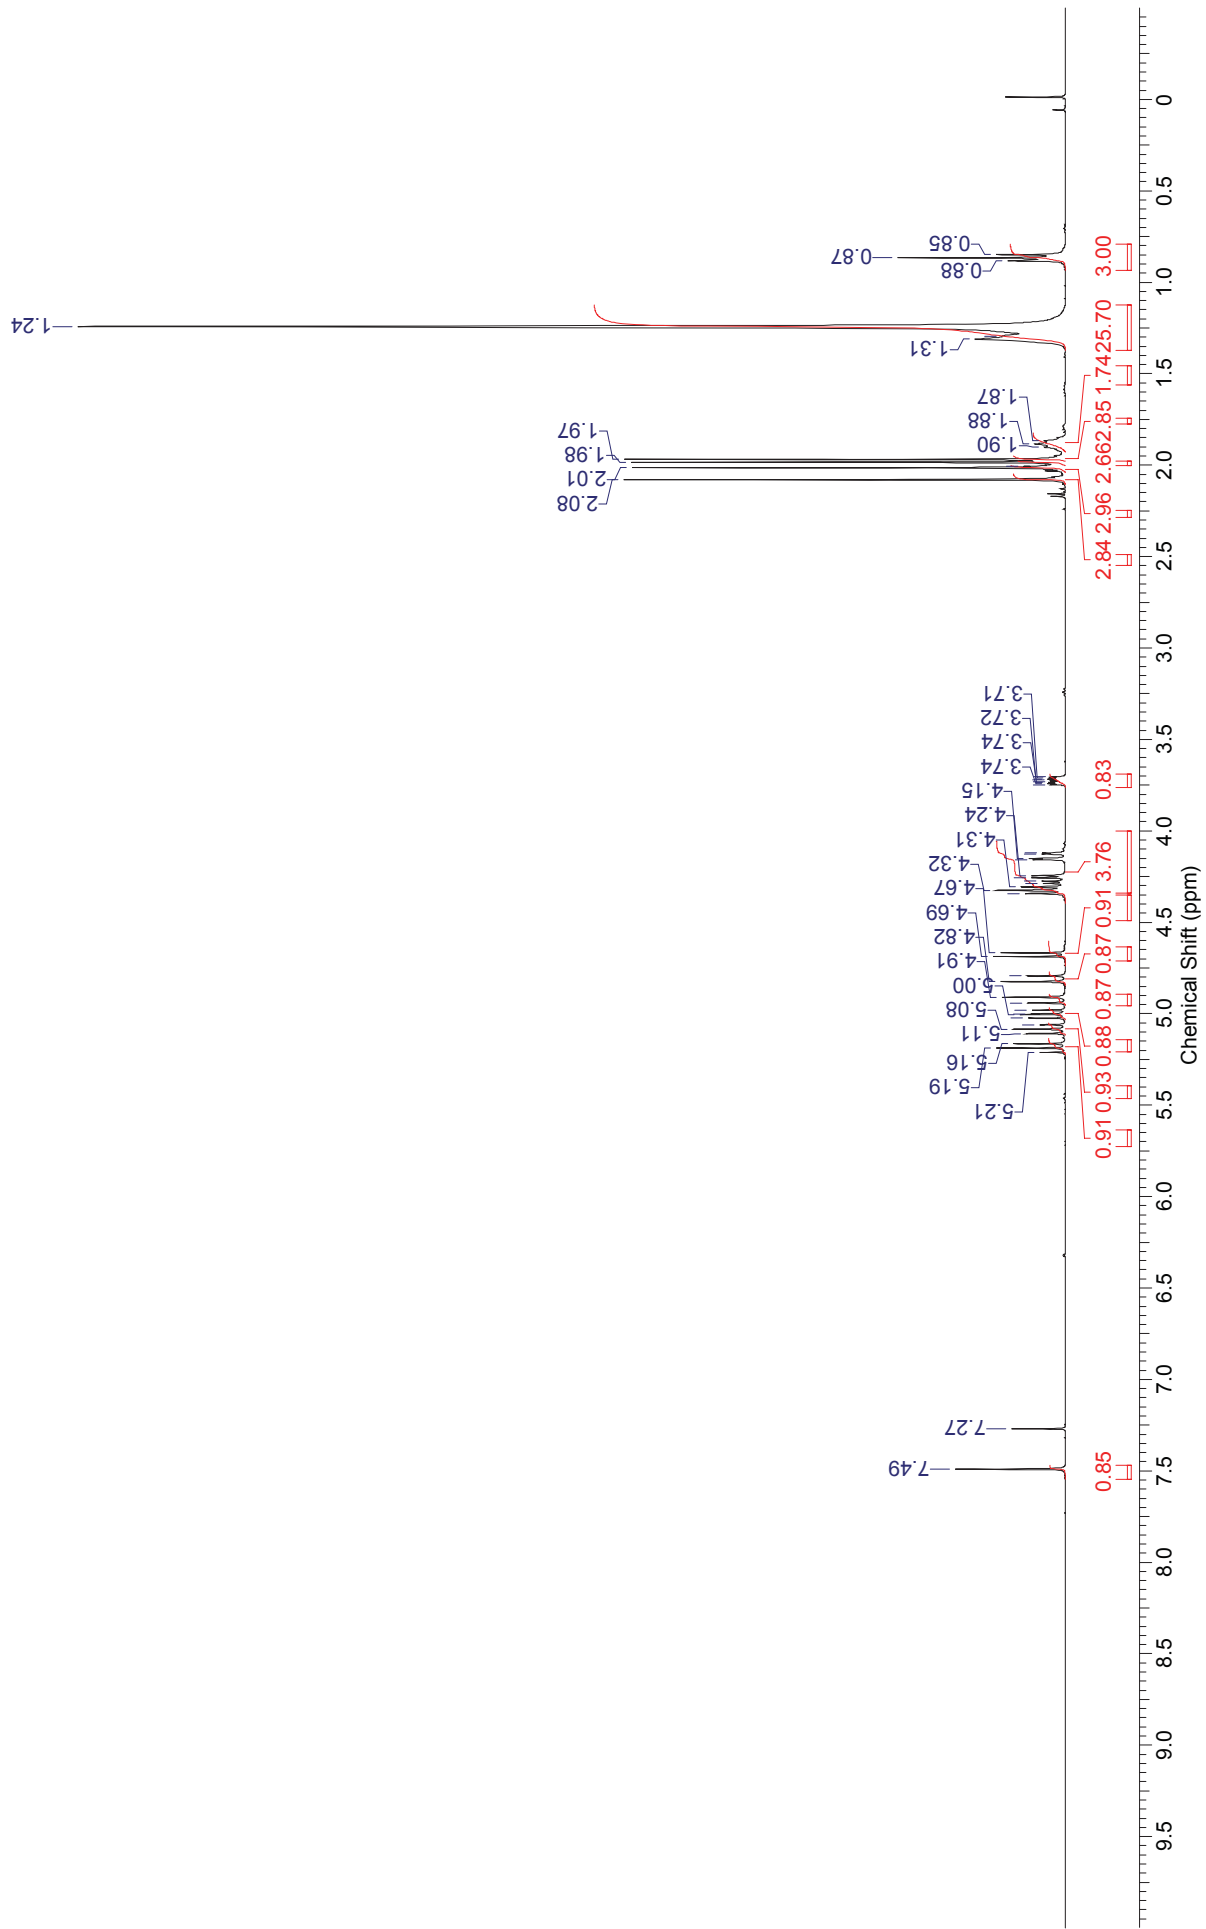

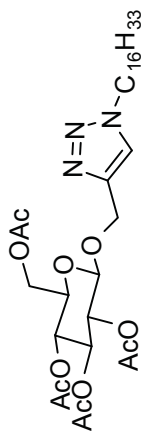

**3e**

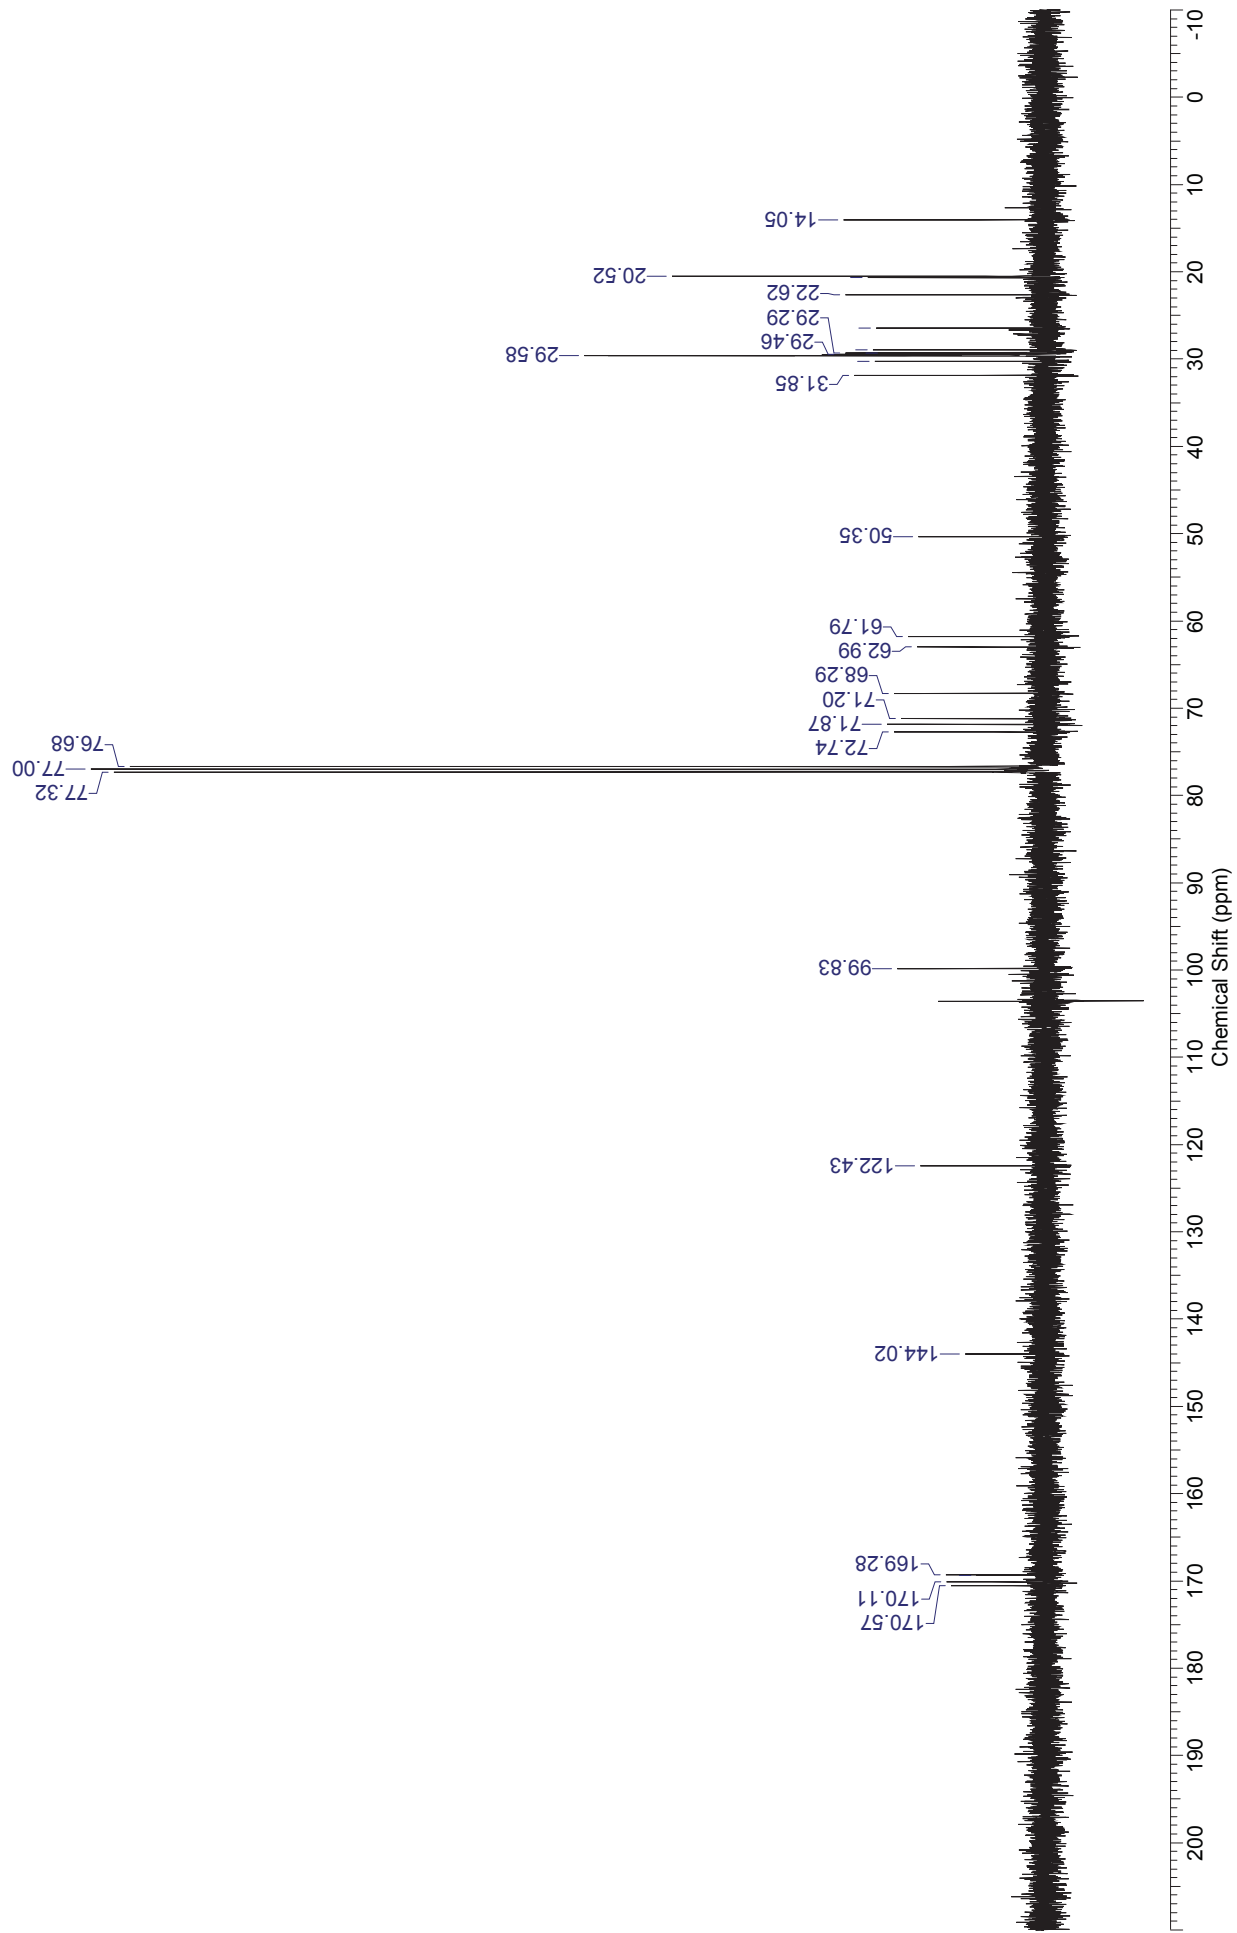

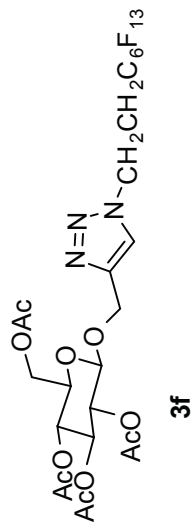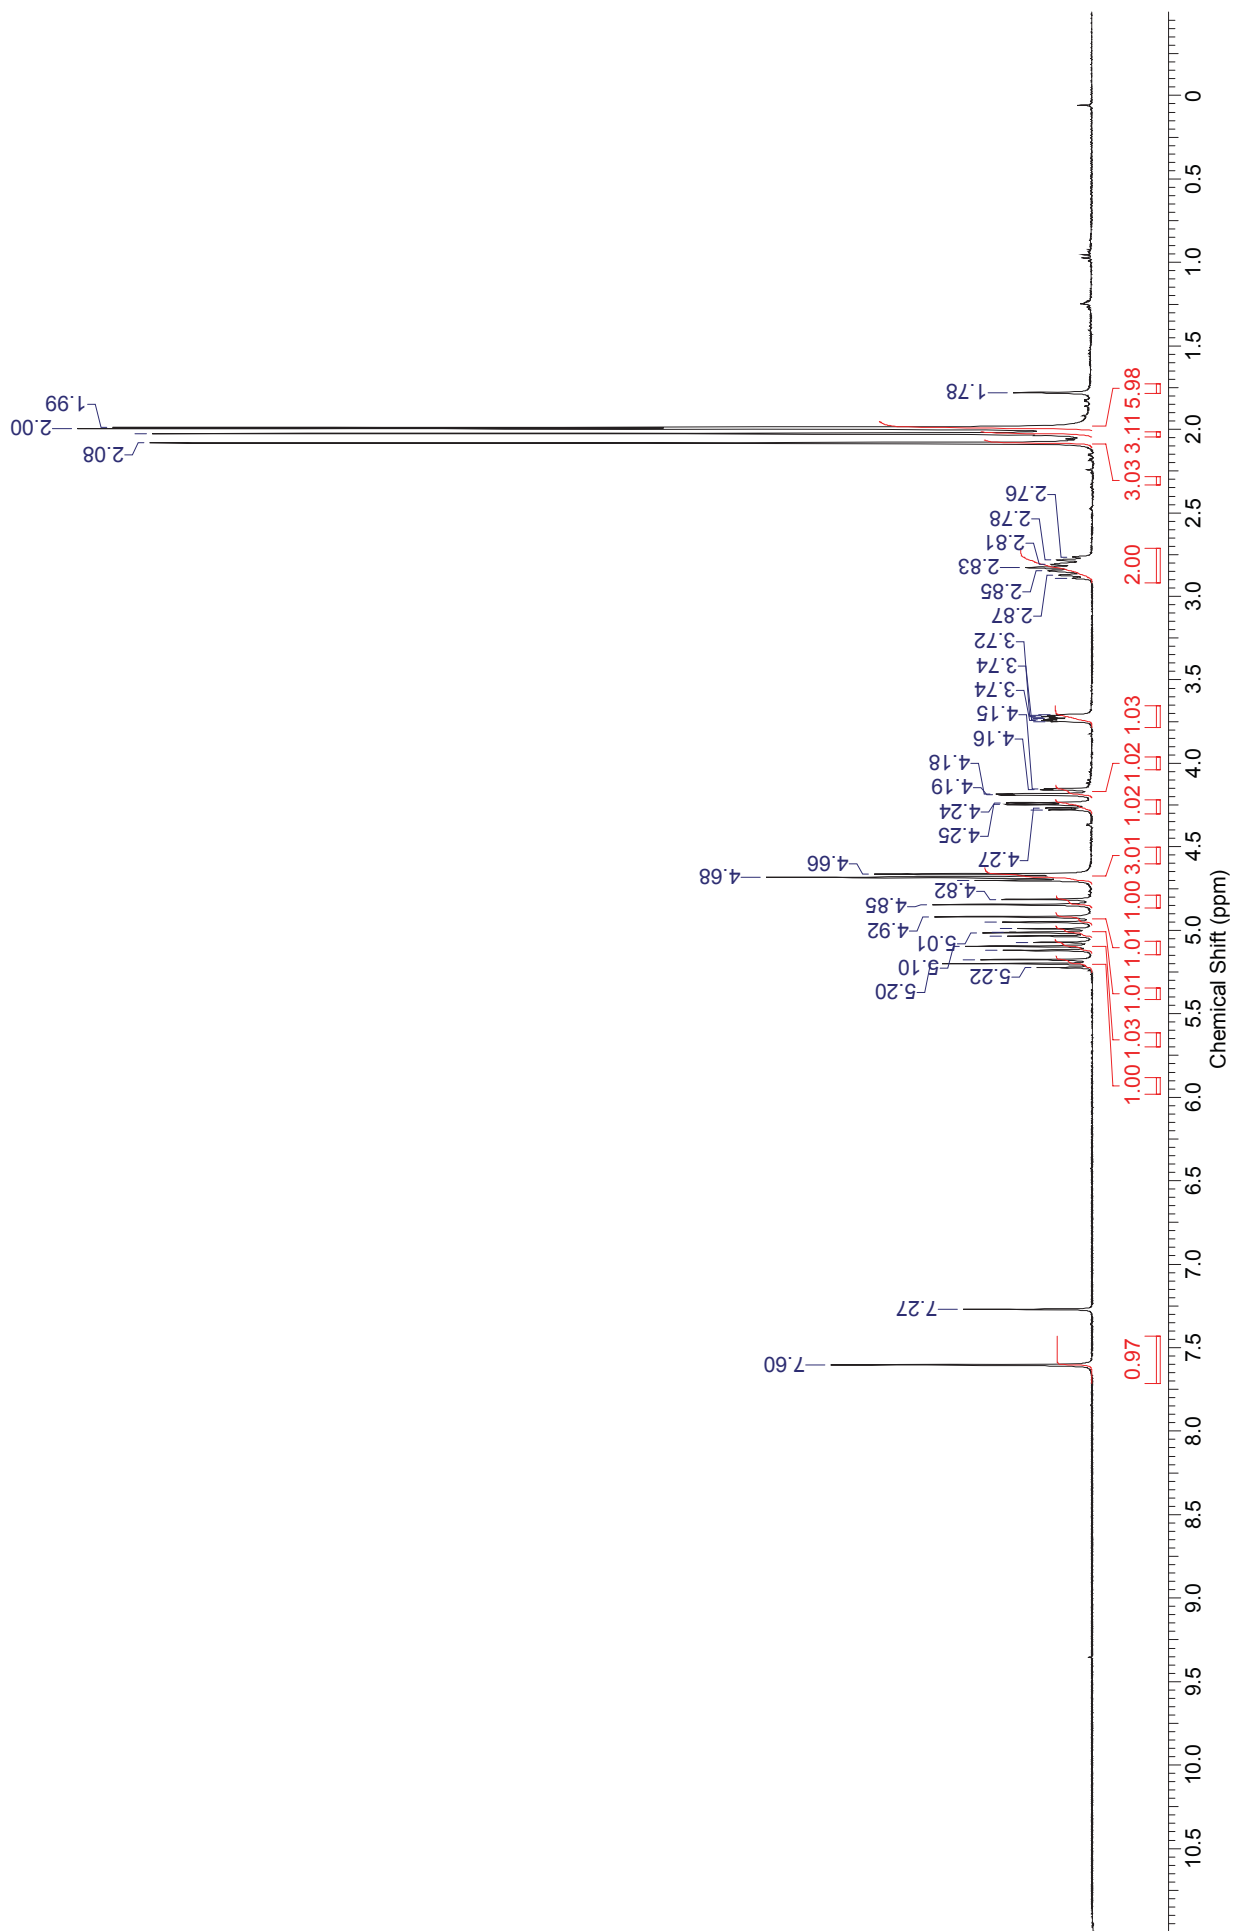

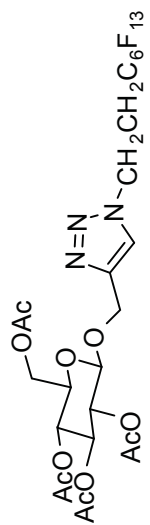

3f

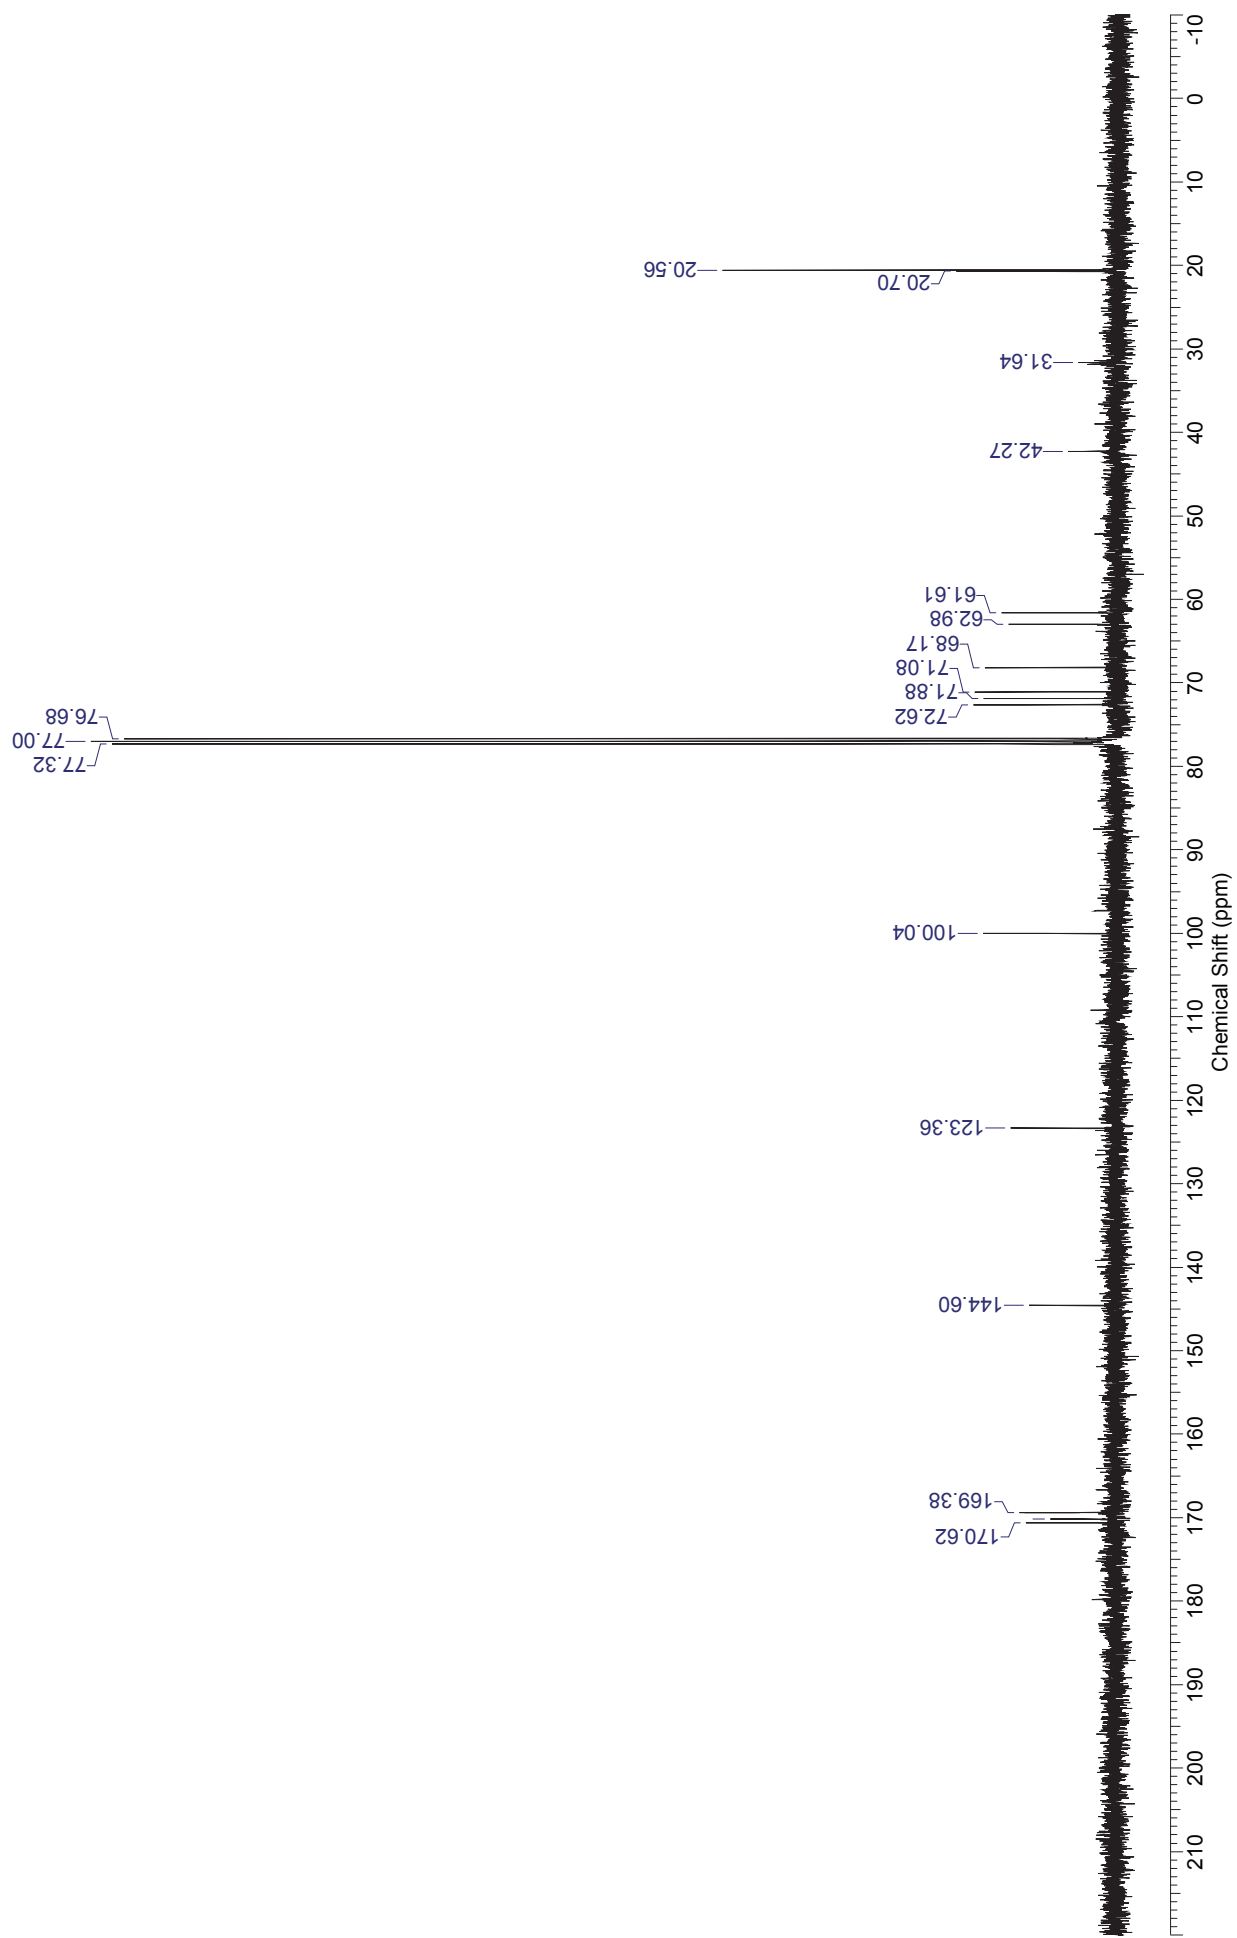

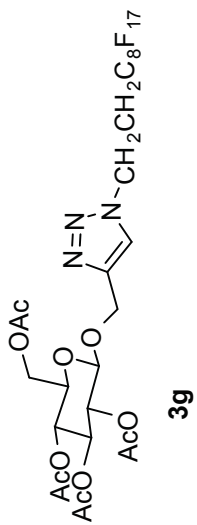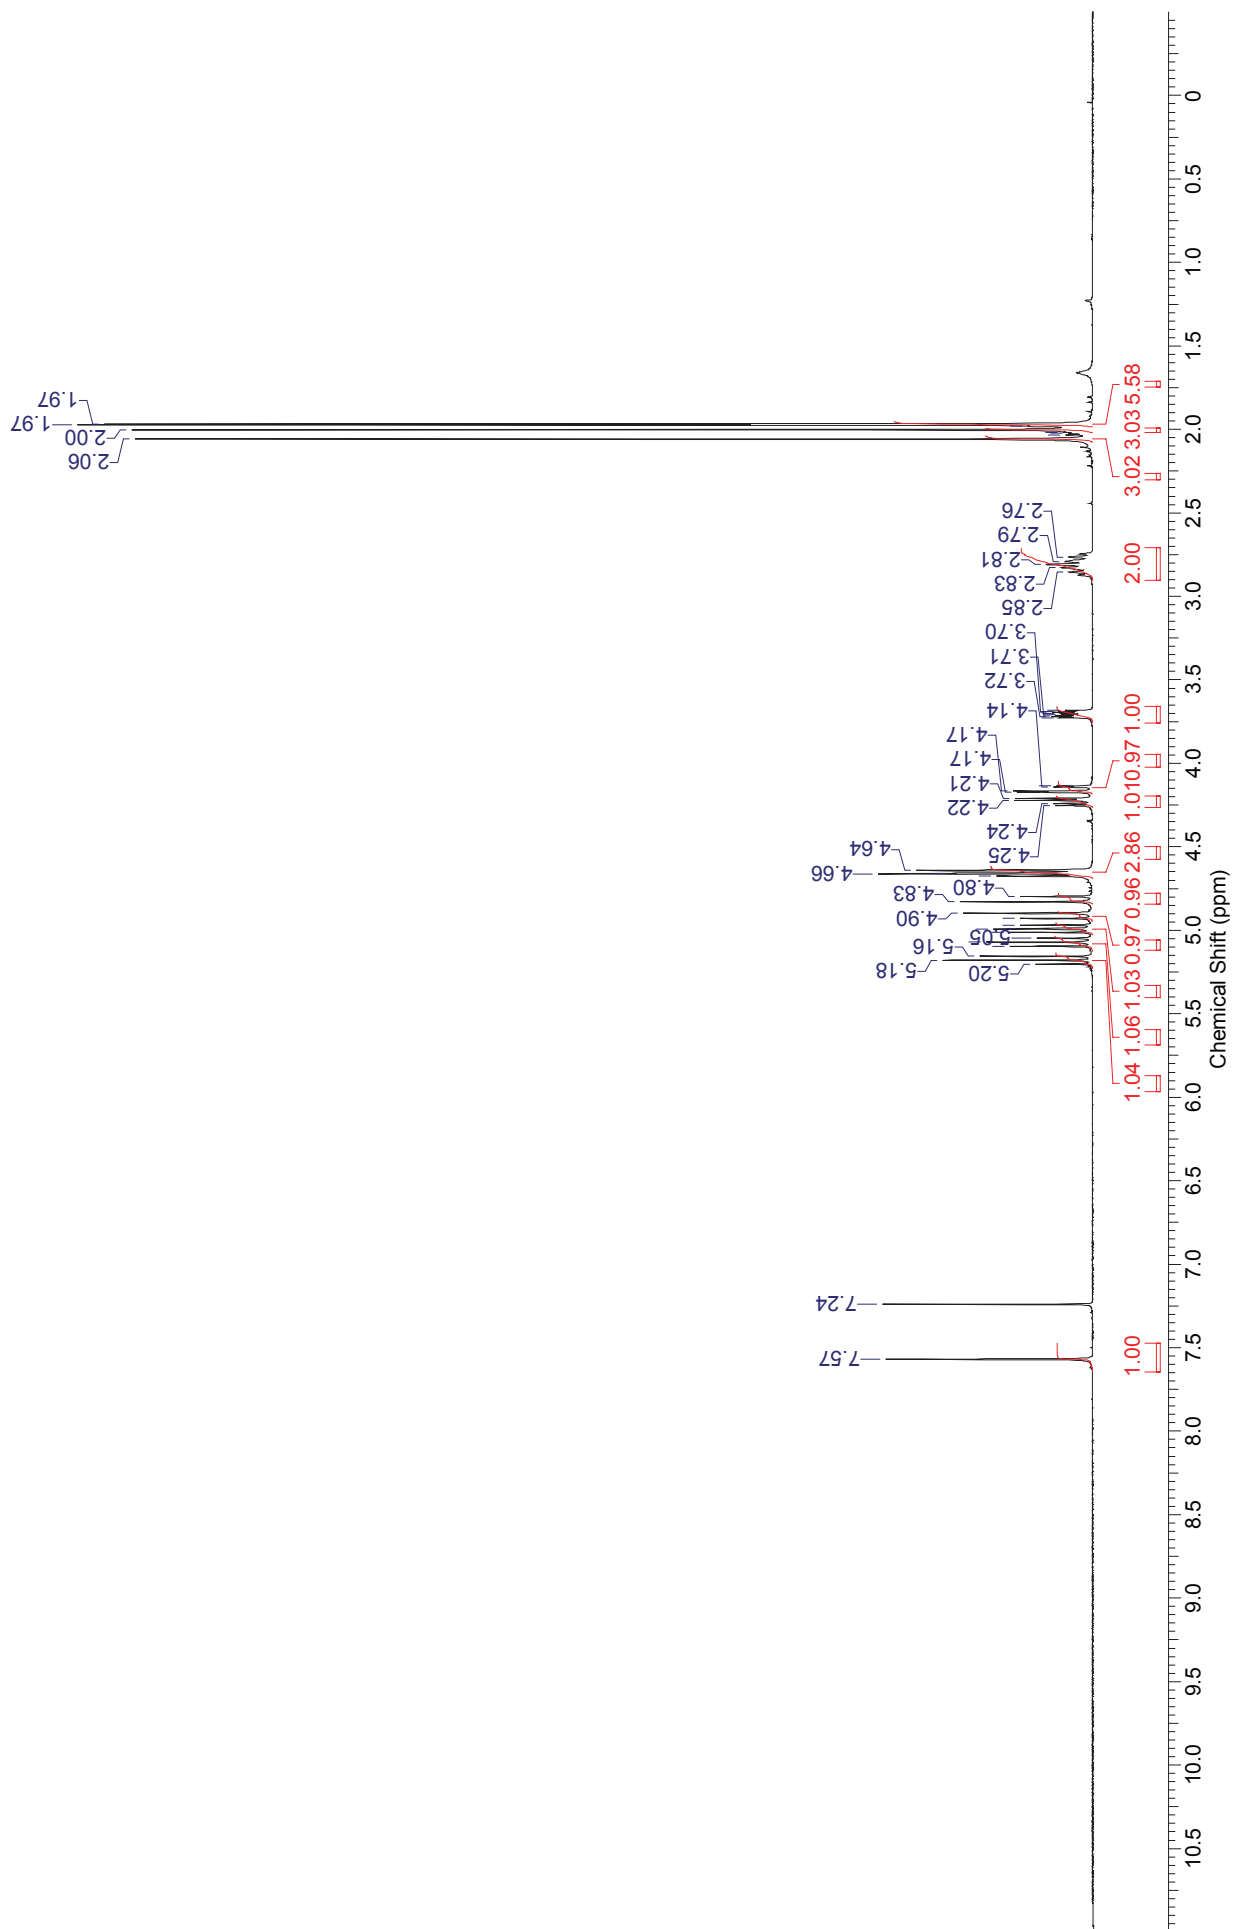

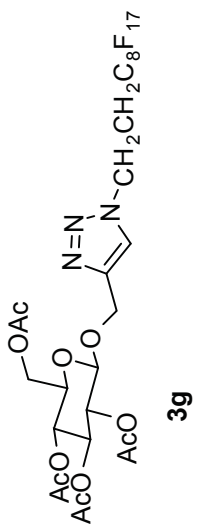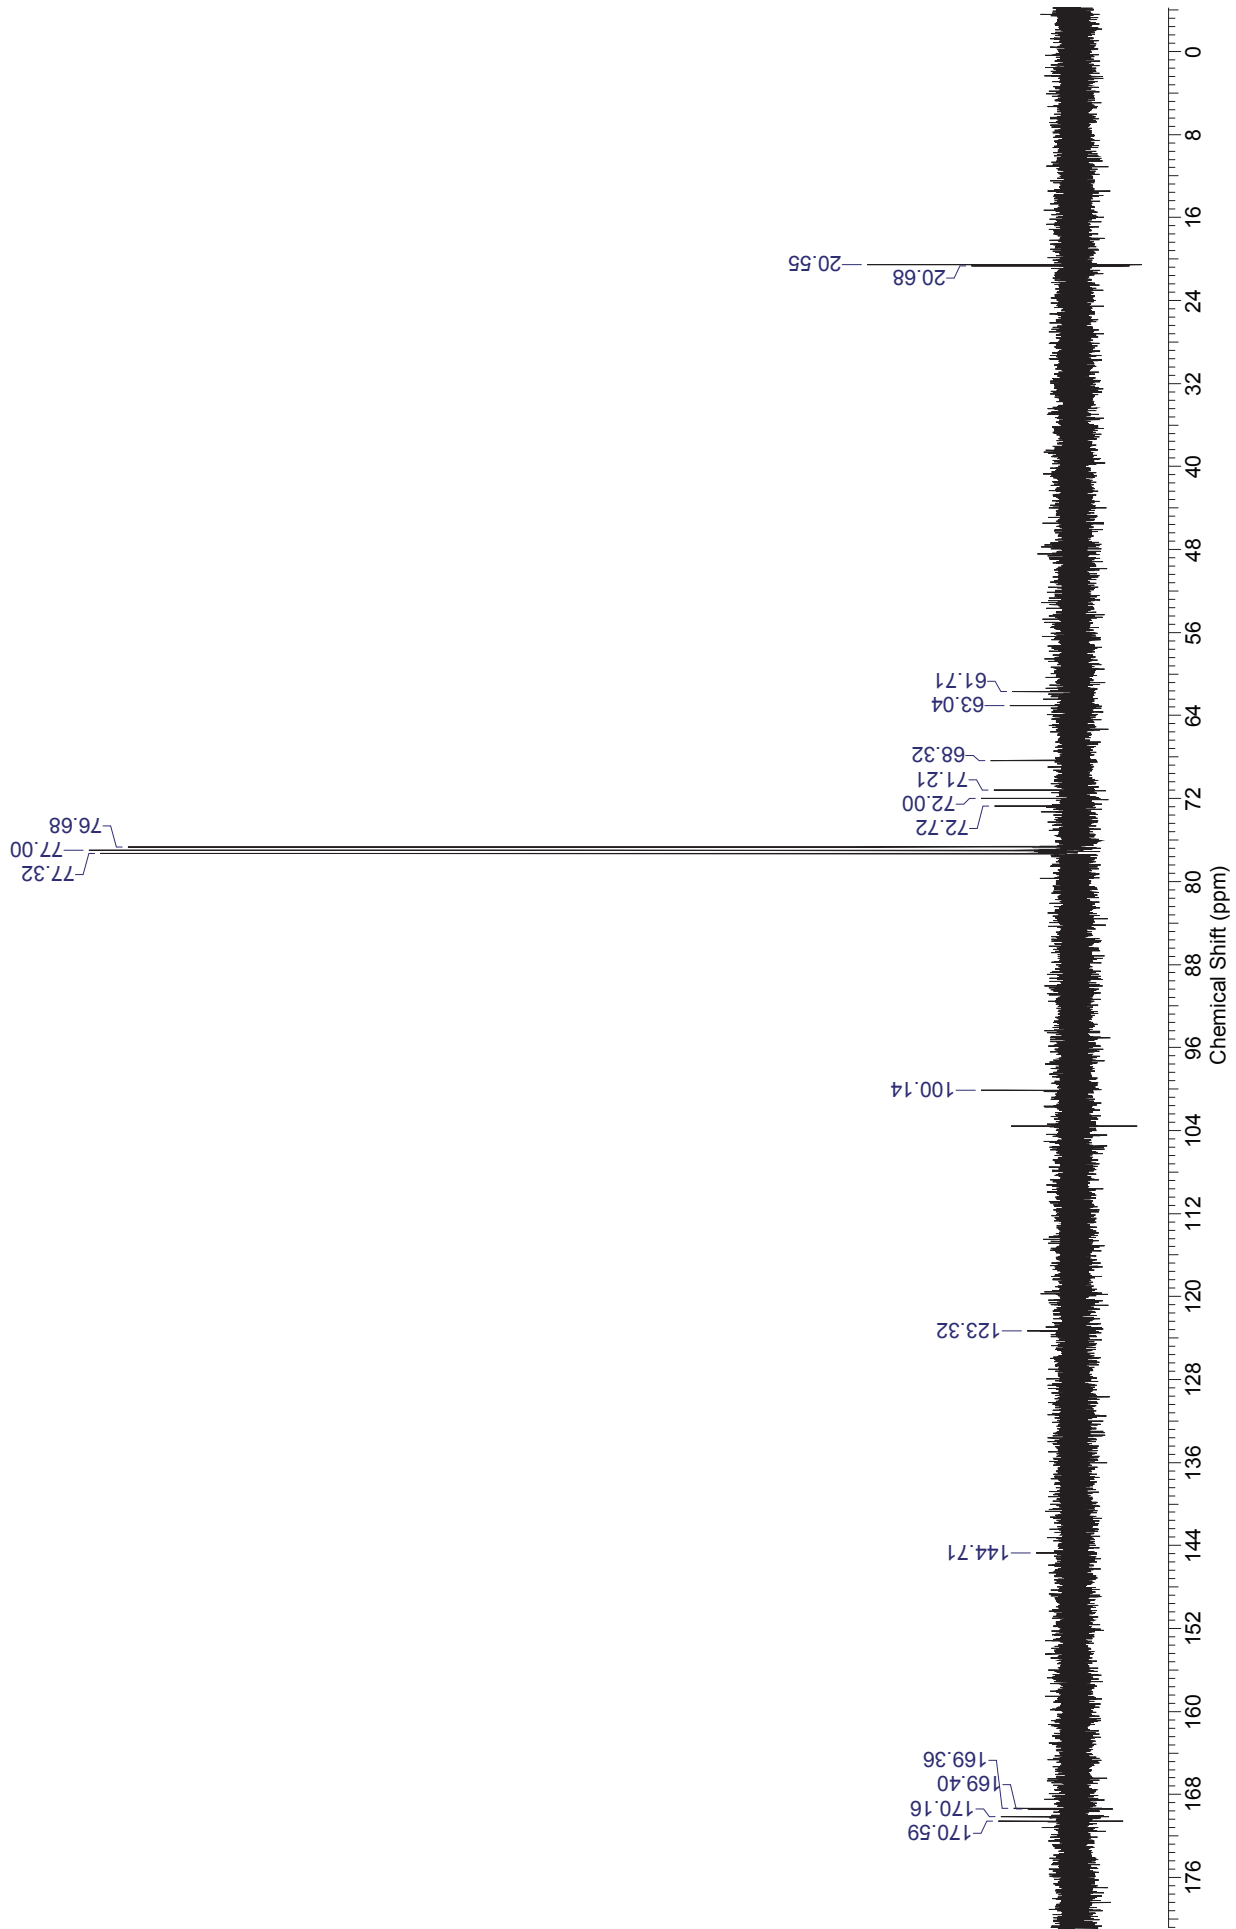

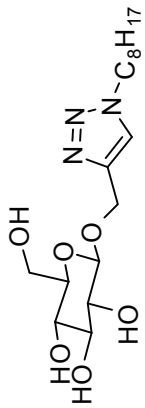

4a

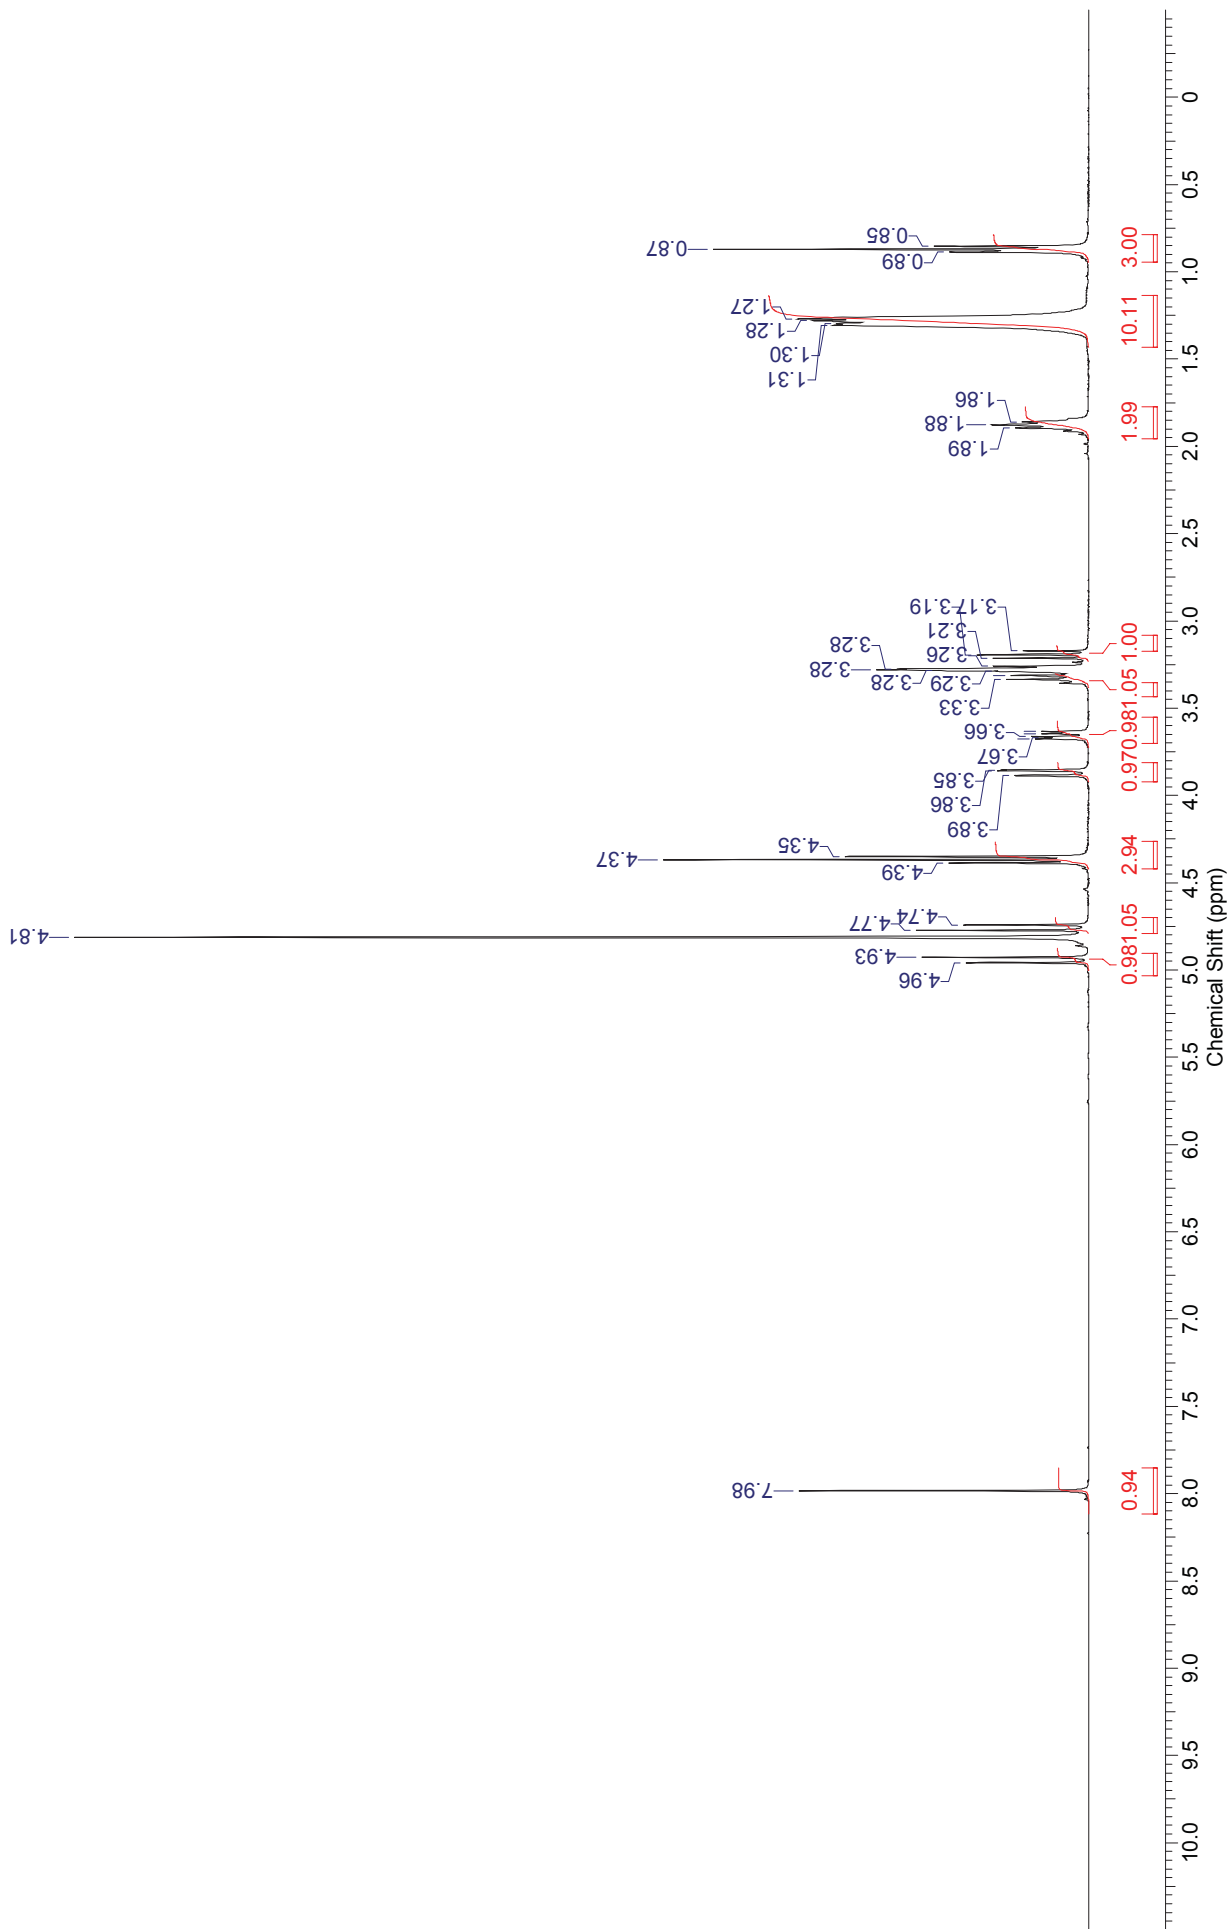

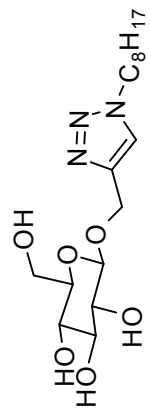

4a

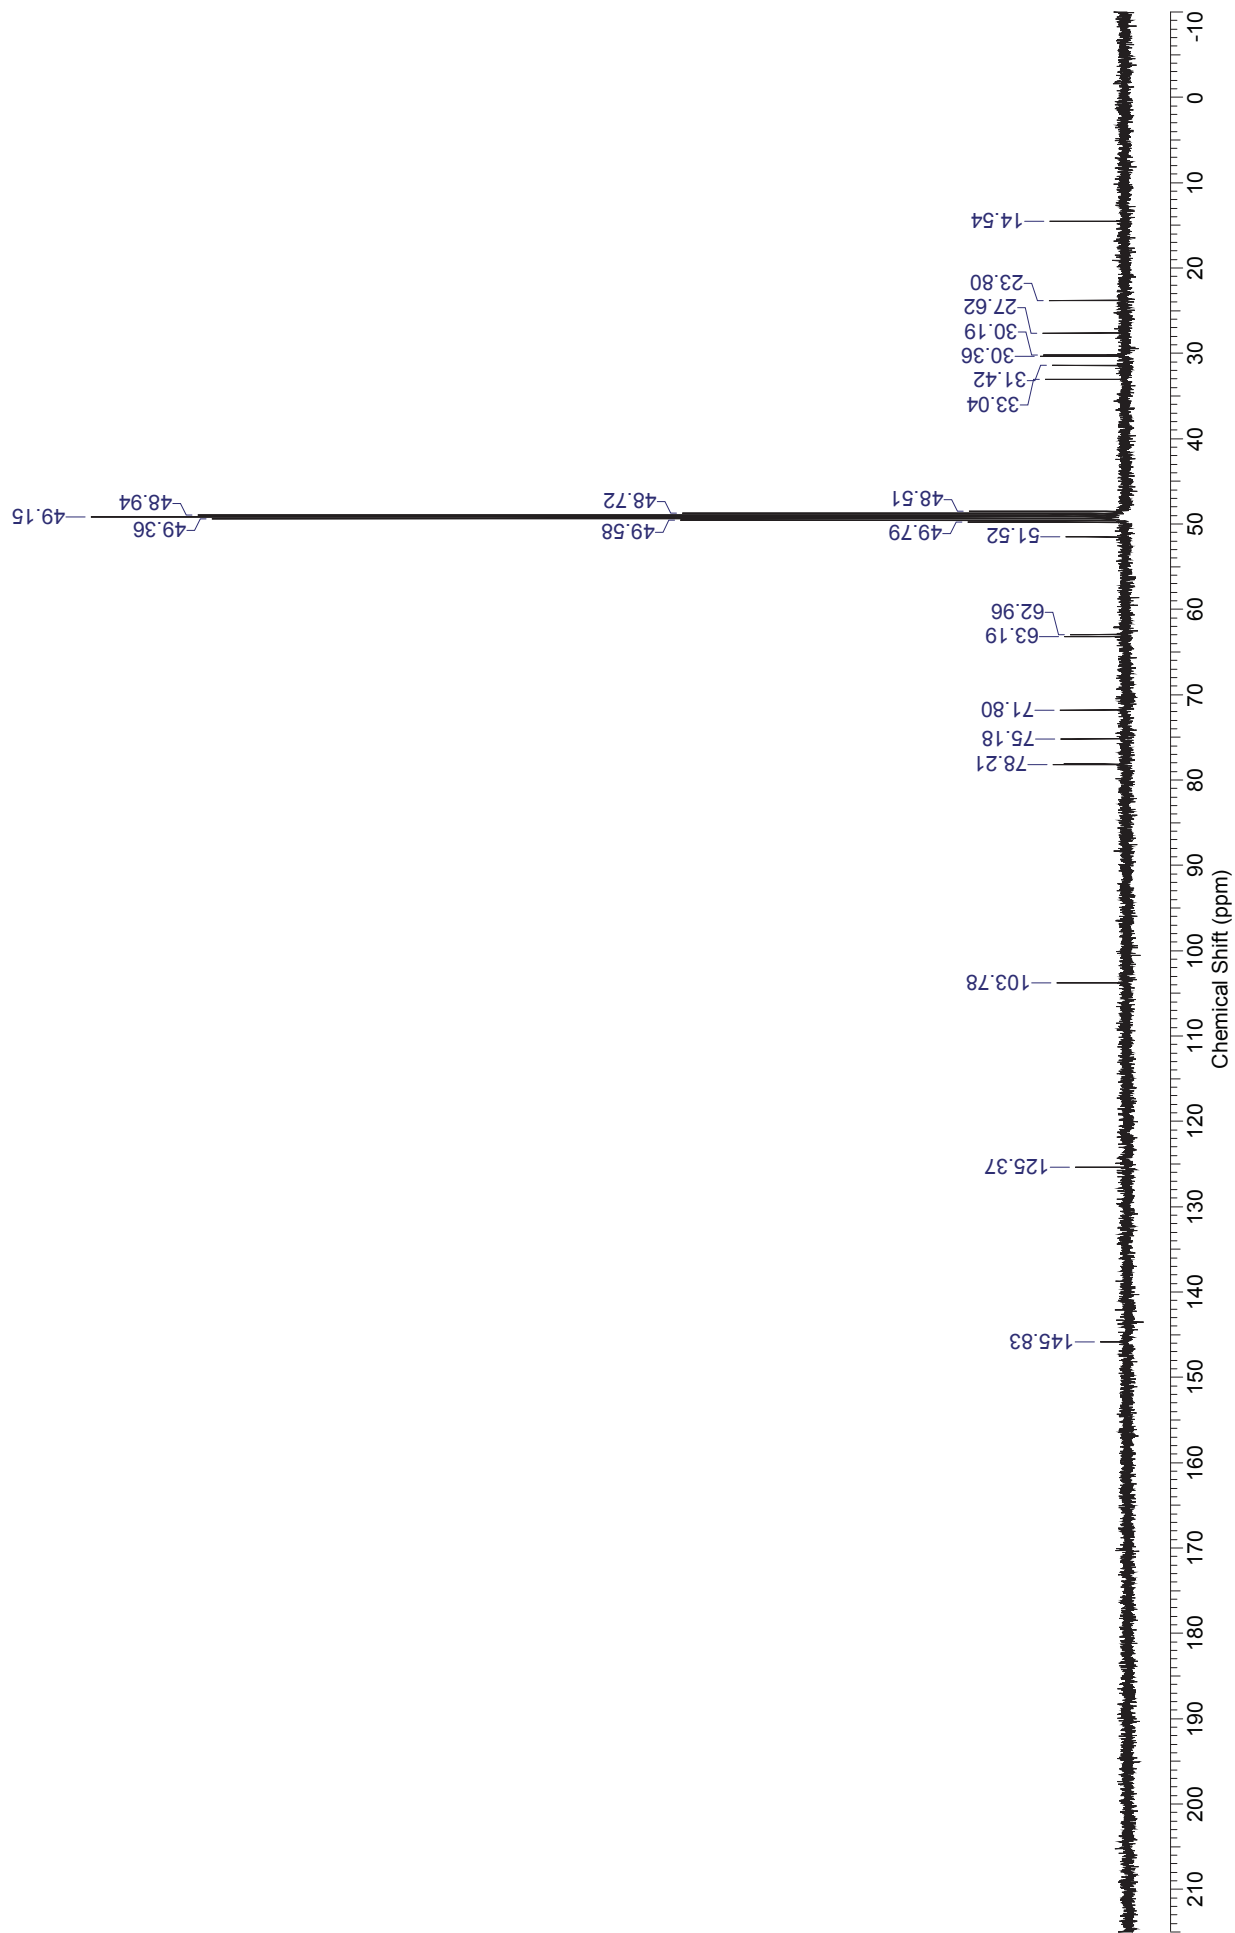



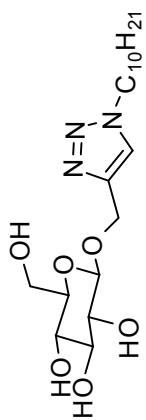

4b

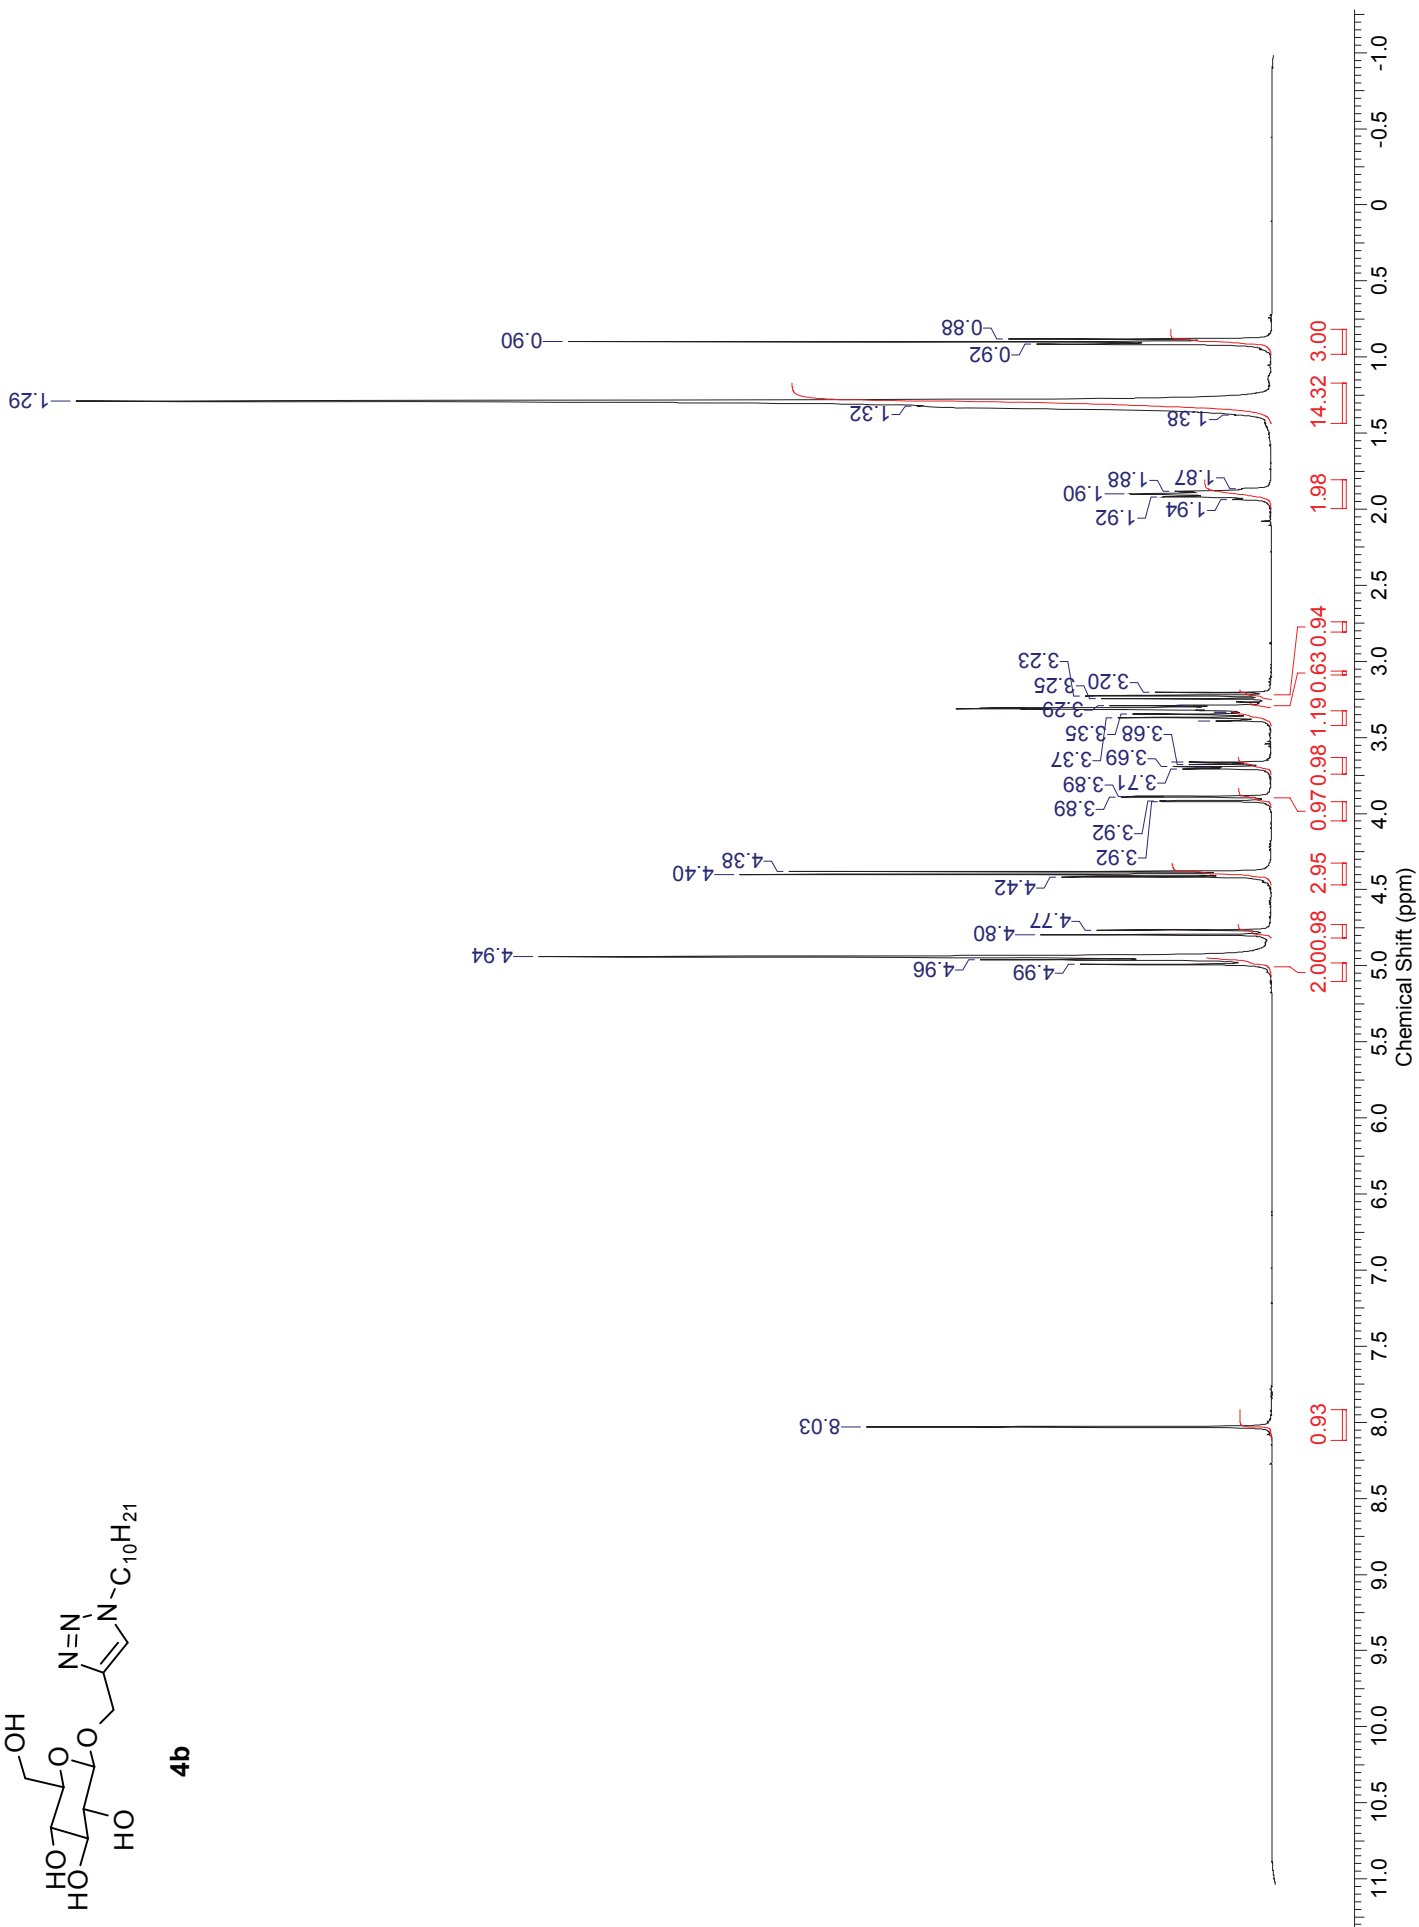

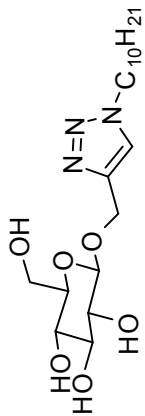

4b

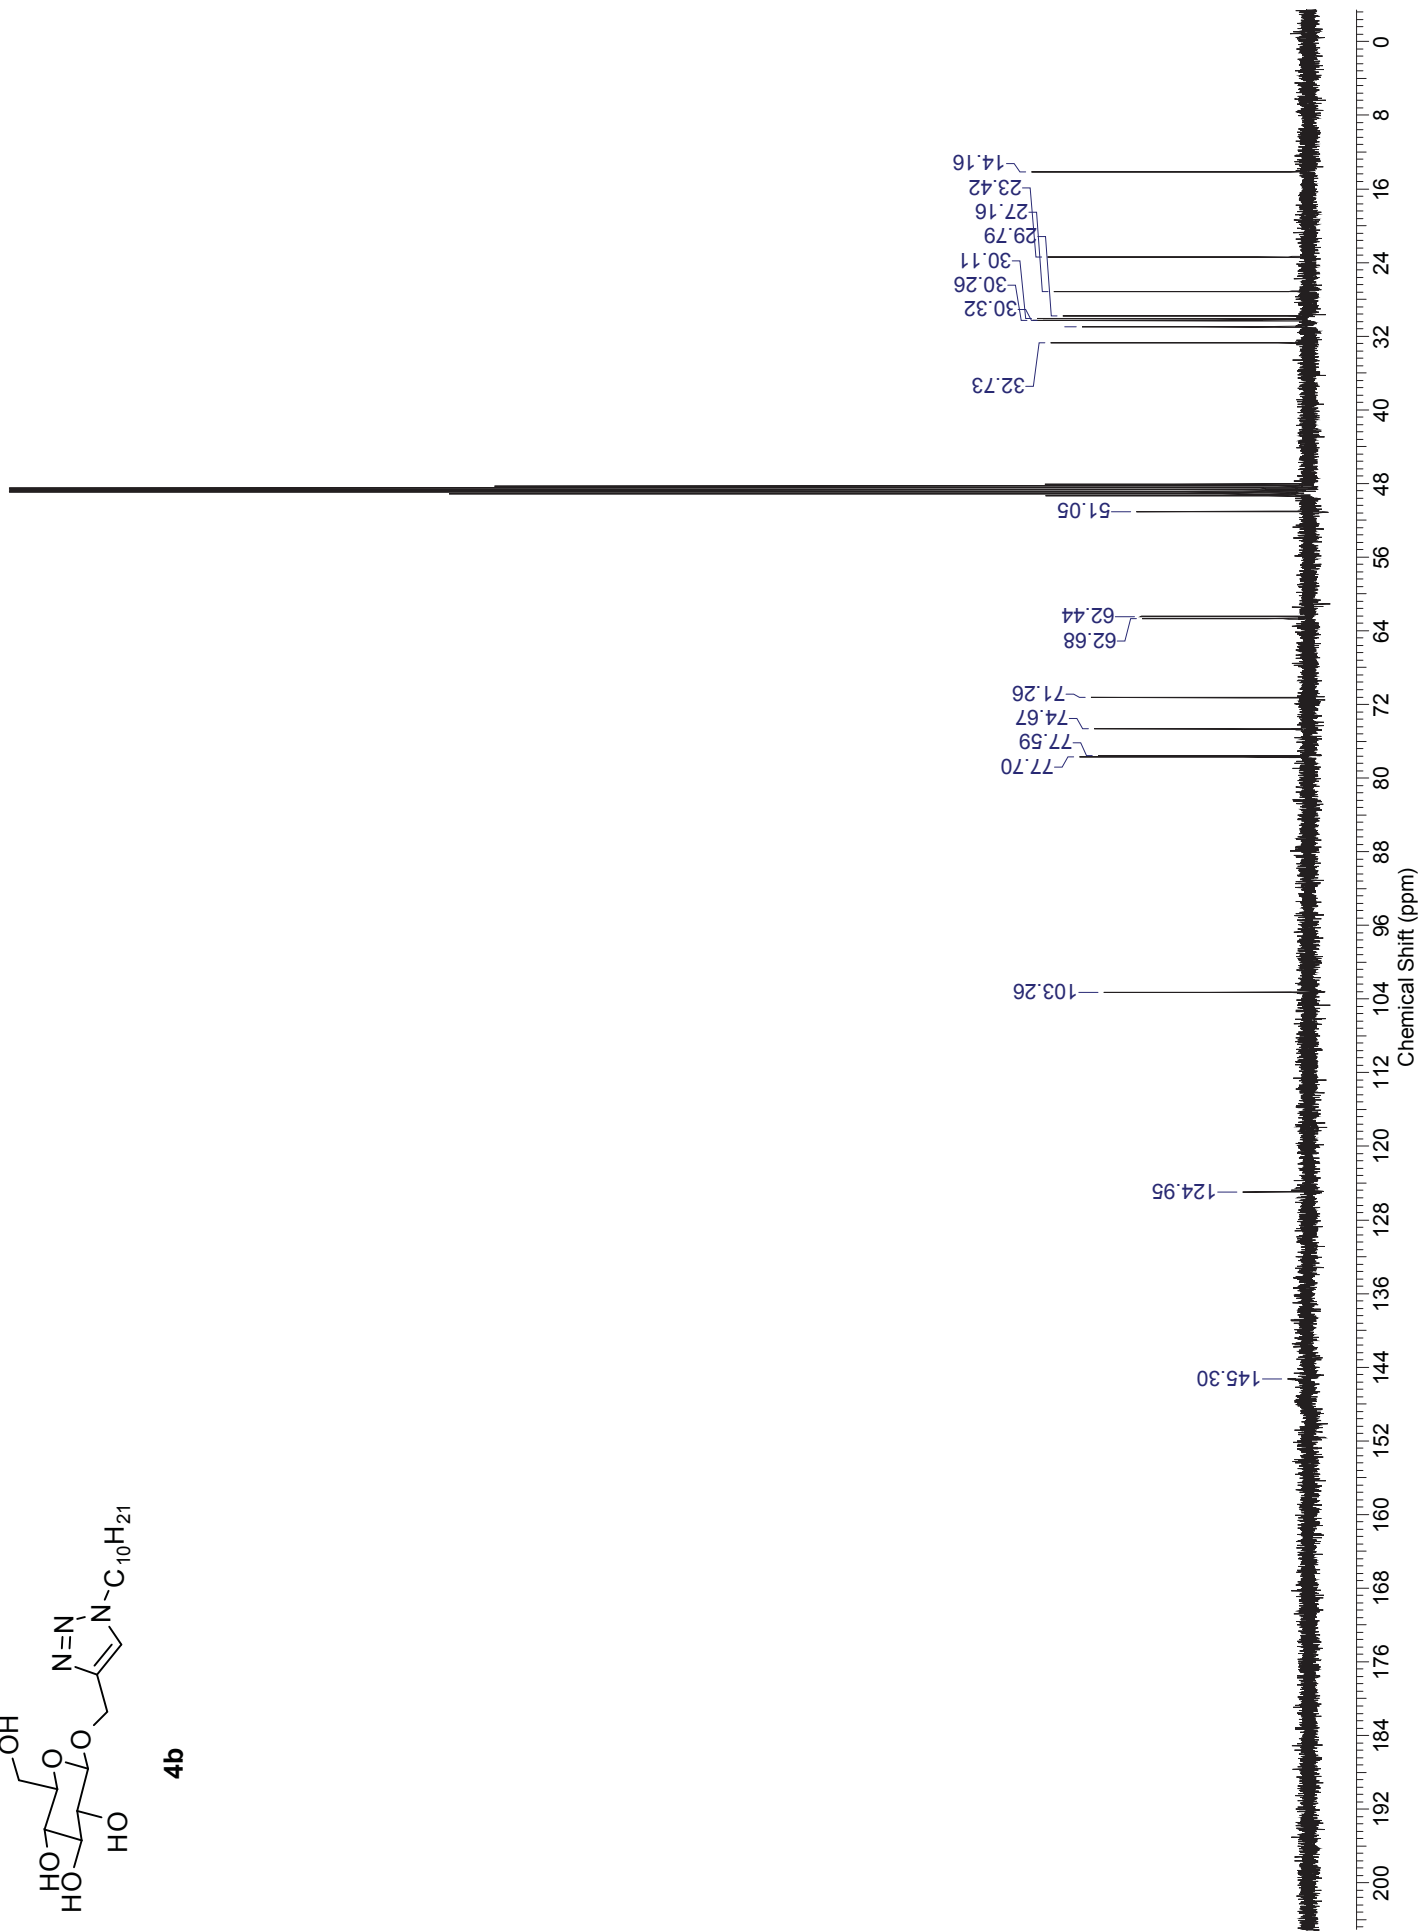

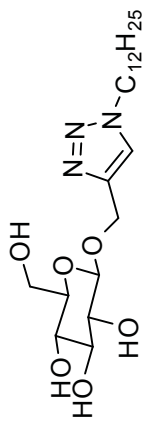

4c

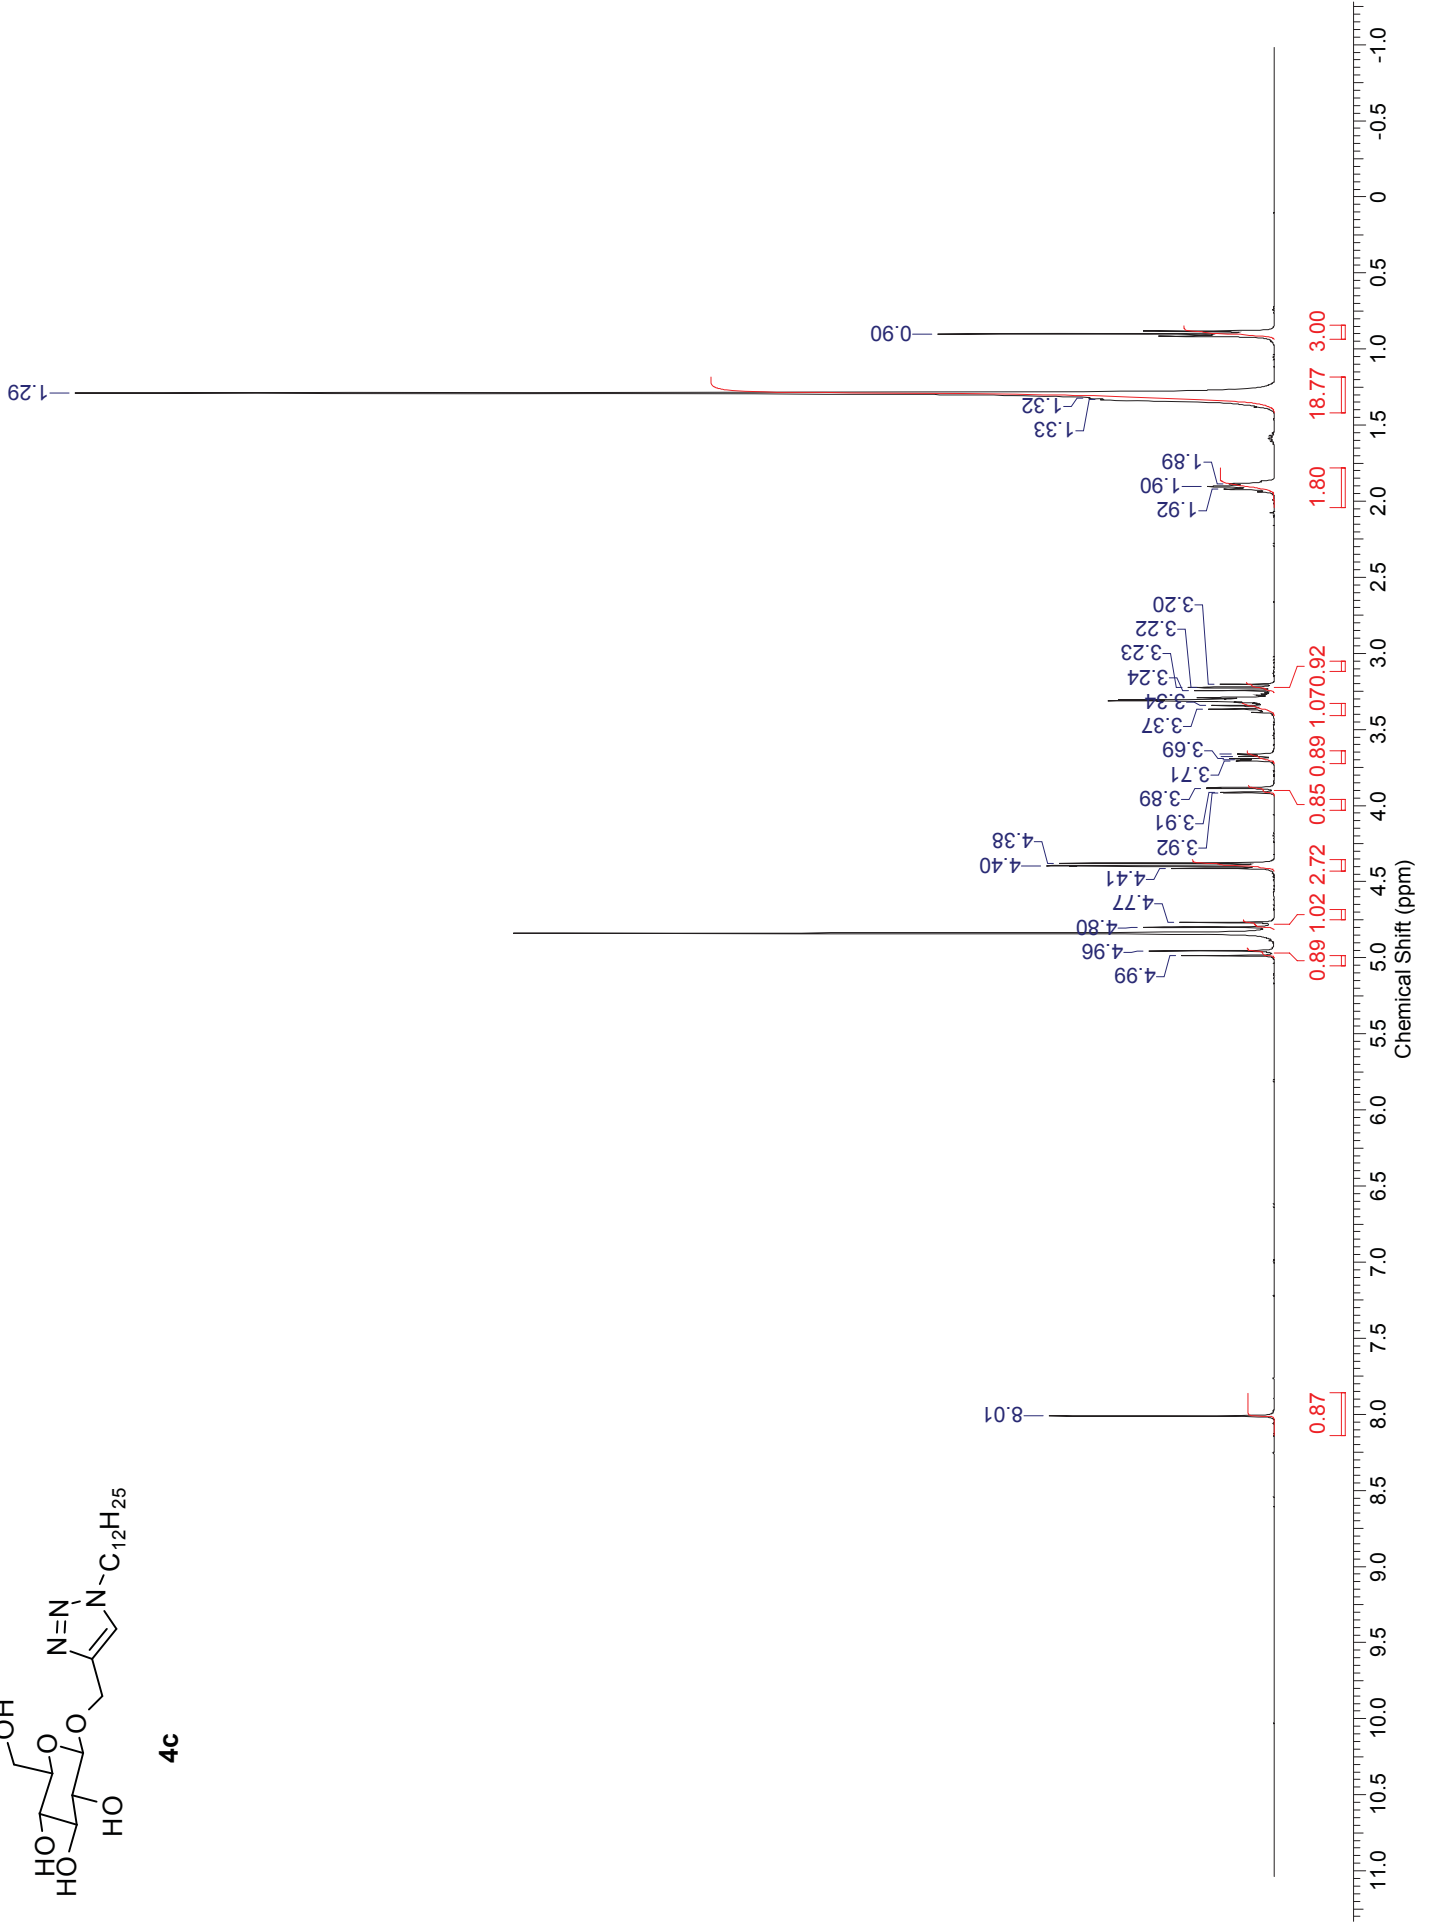

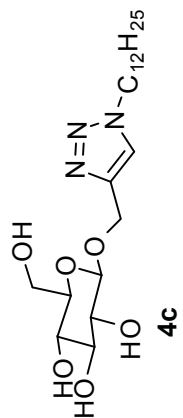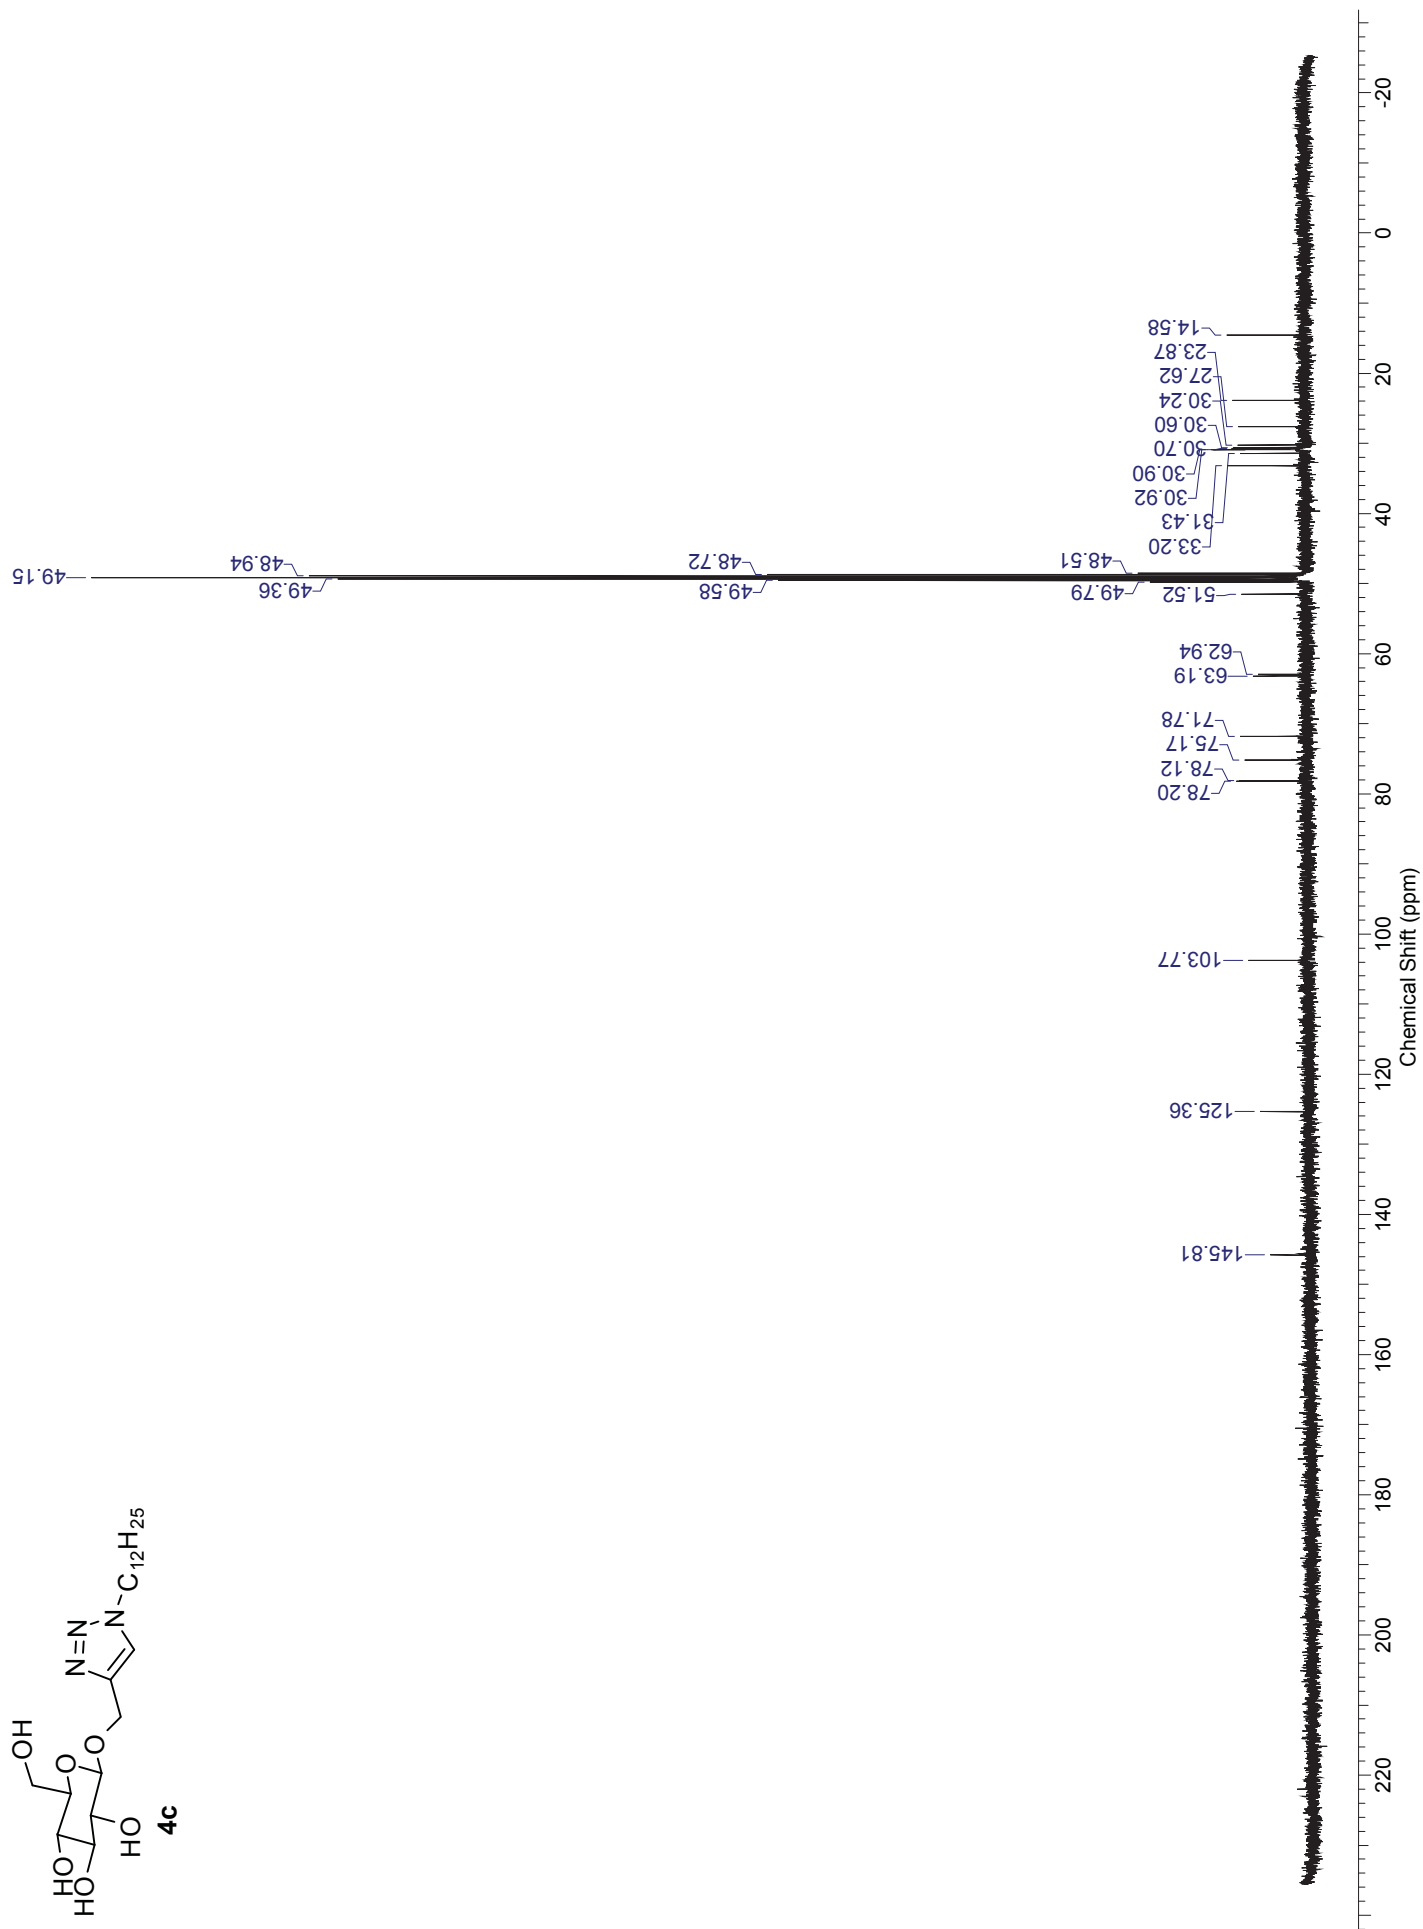

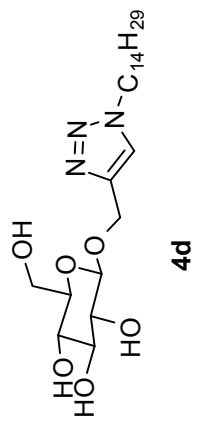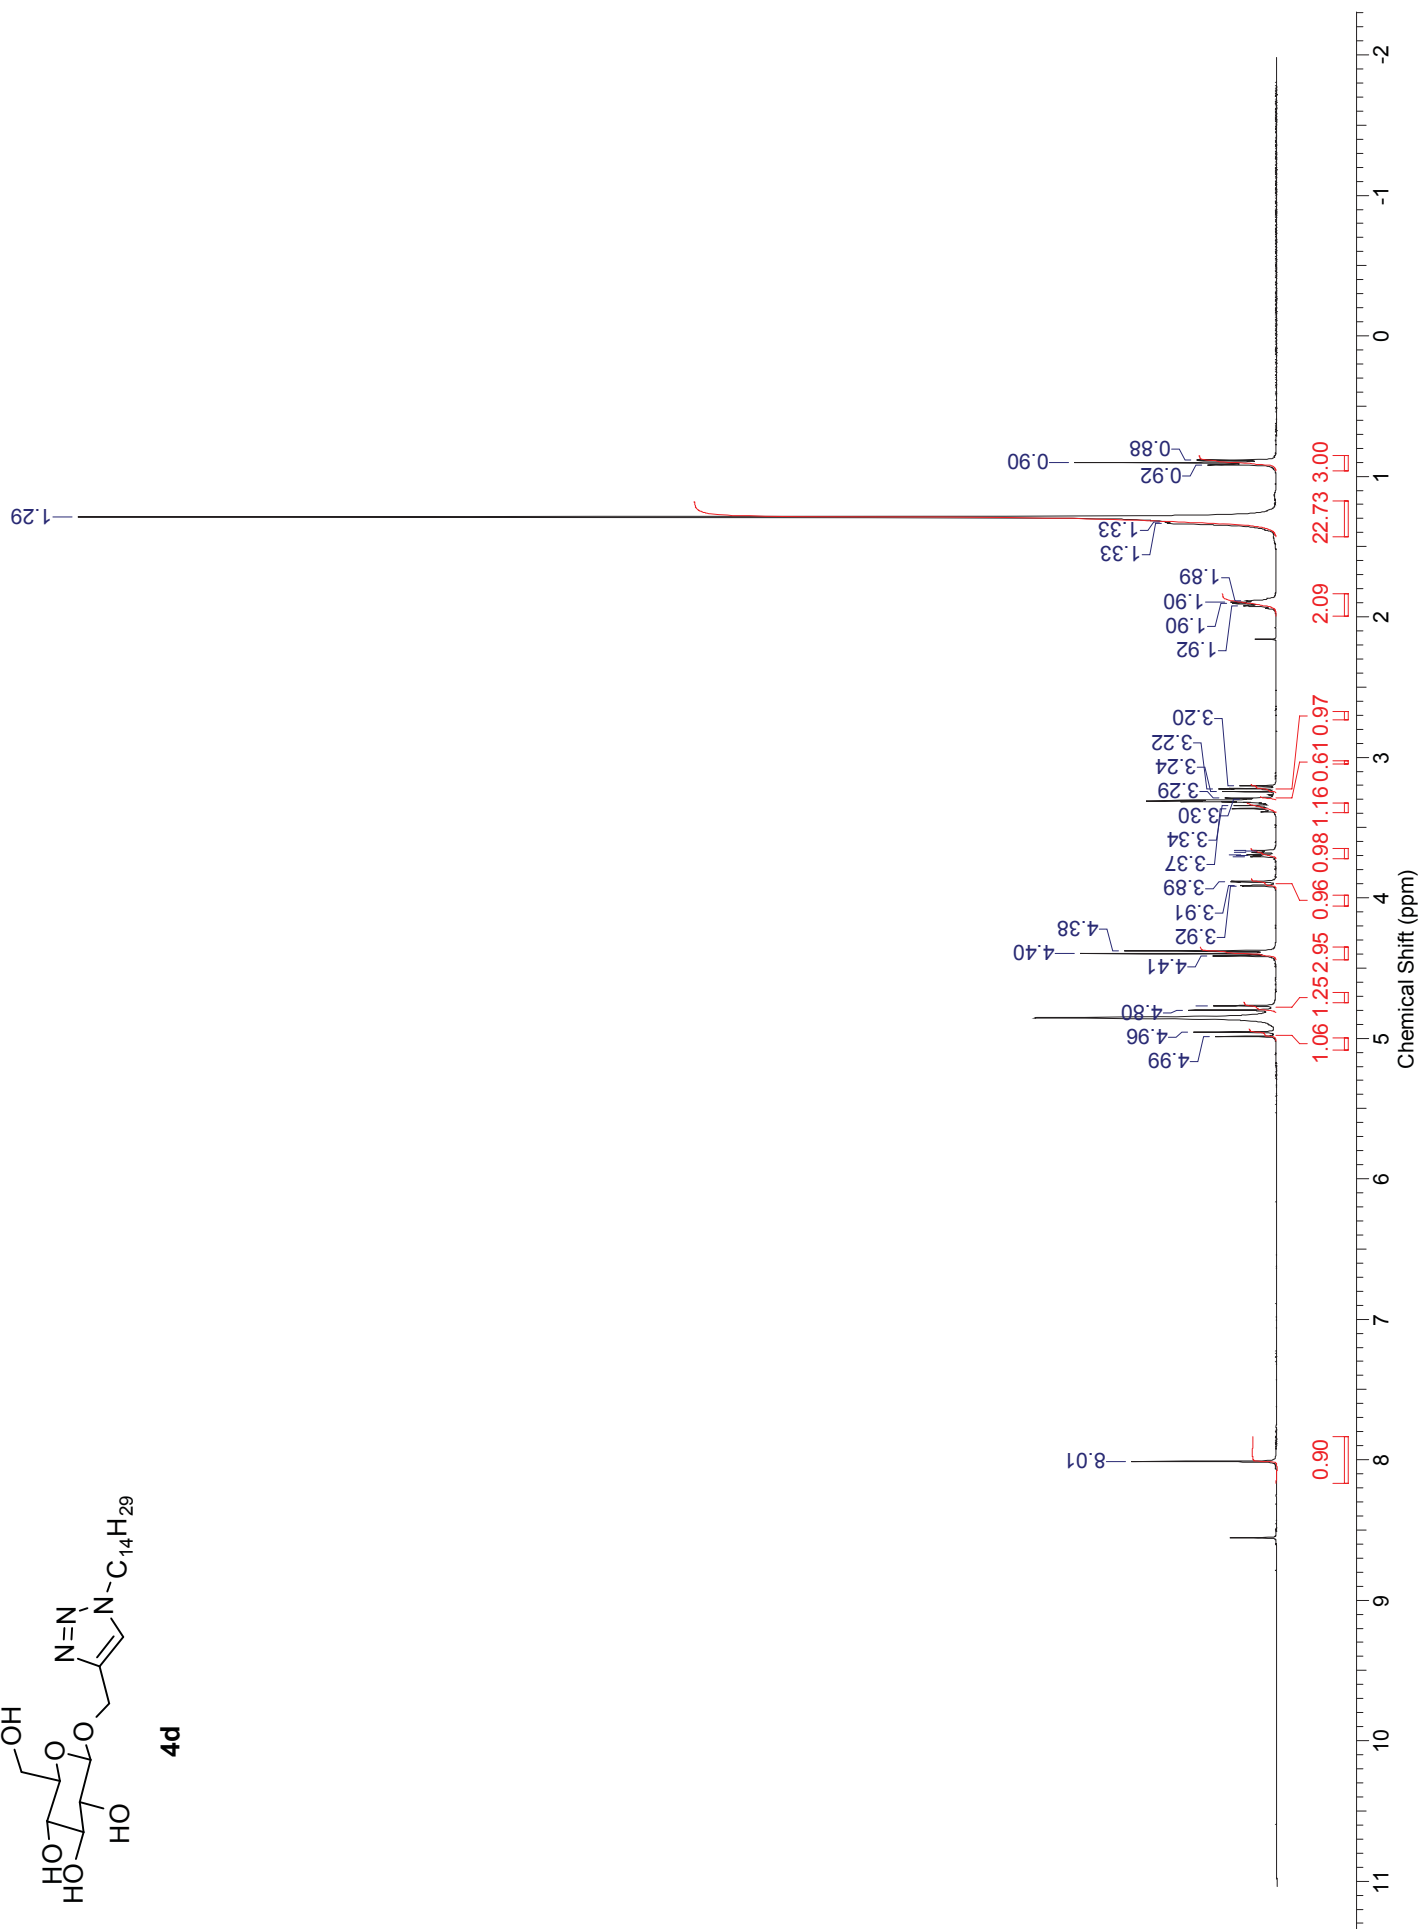

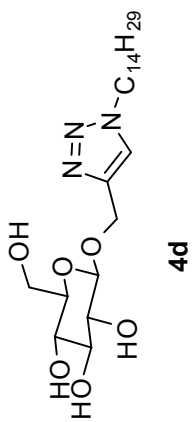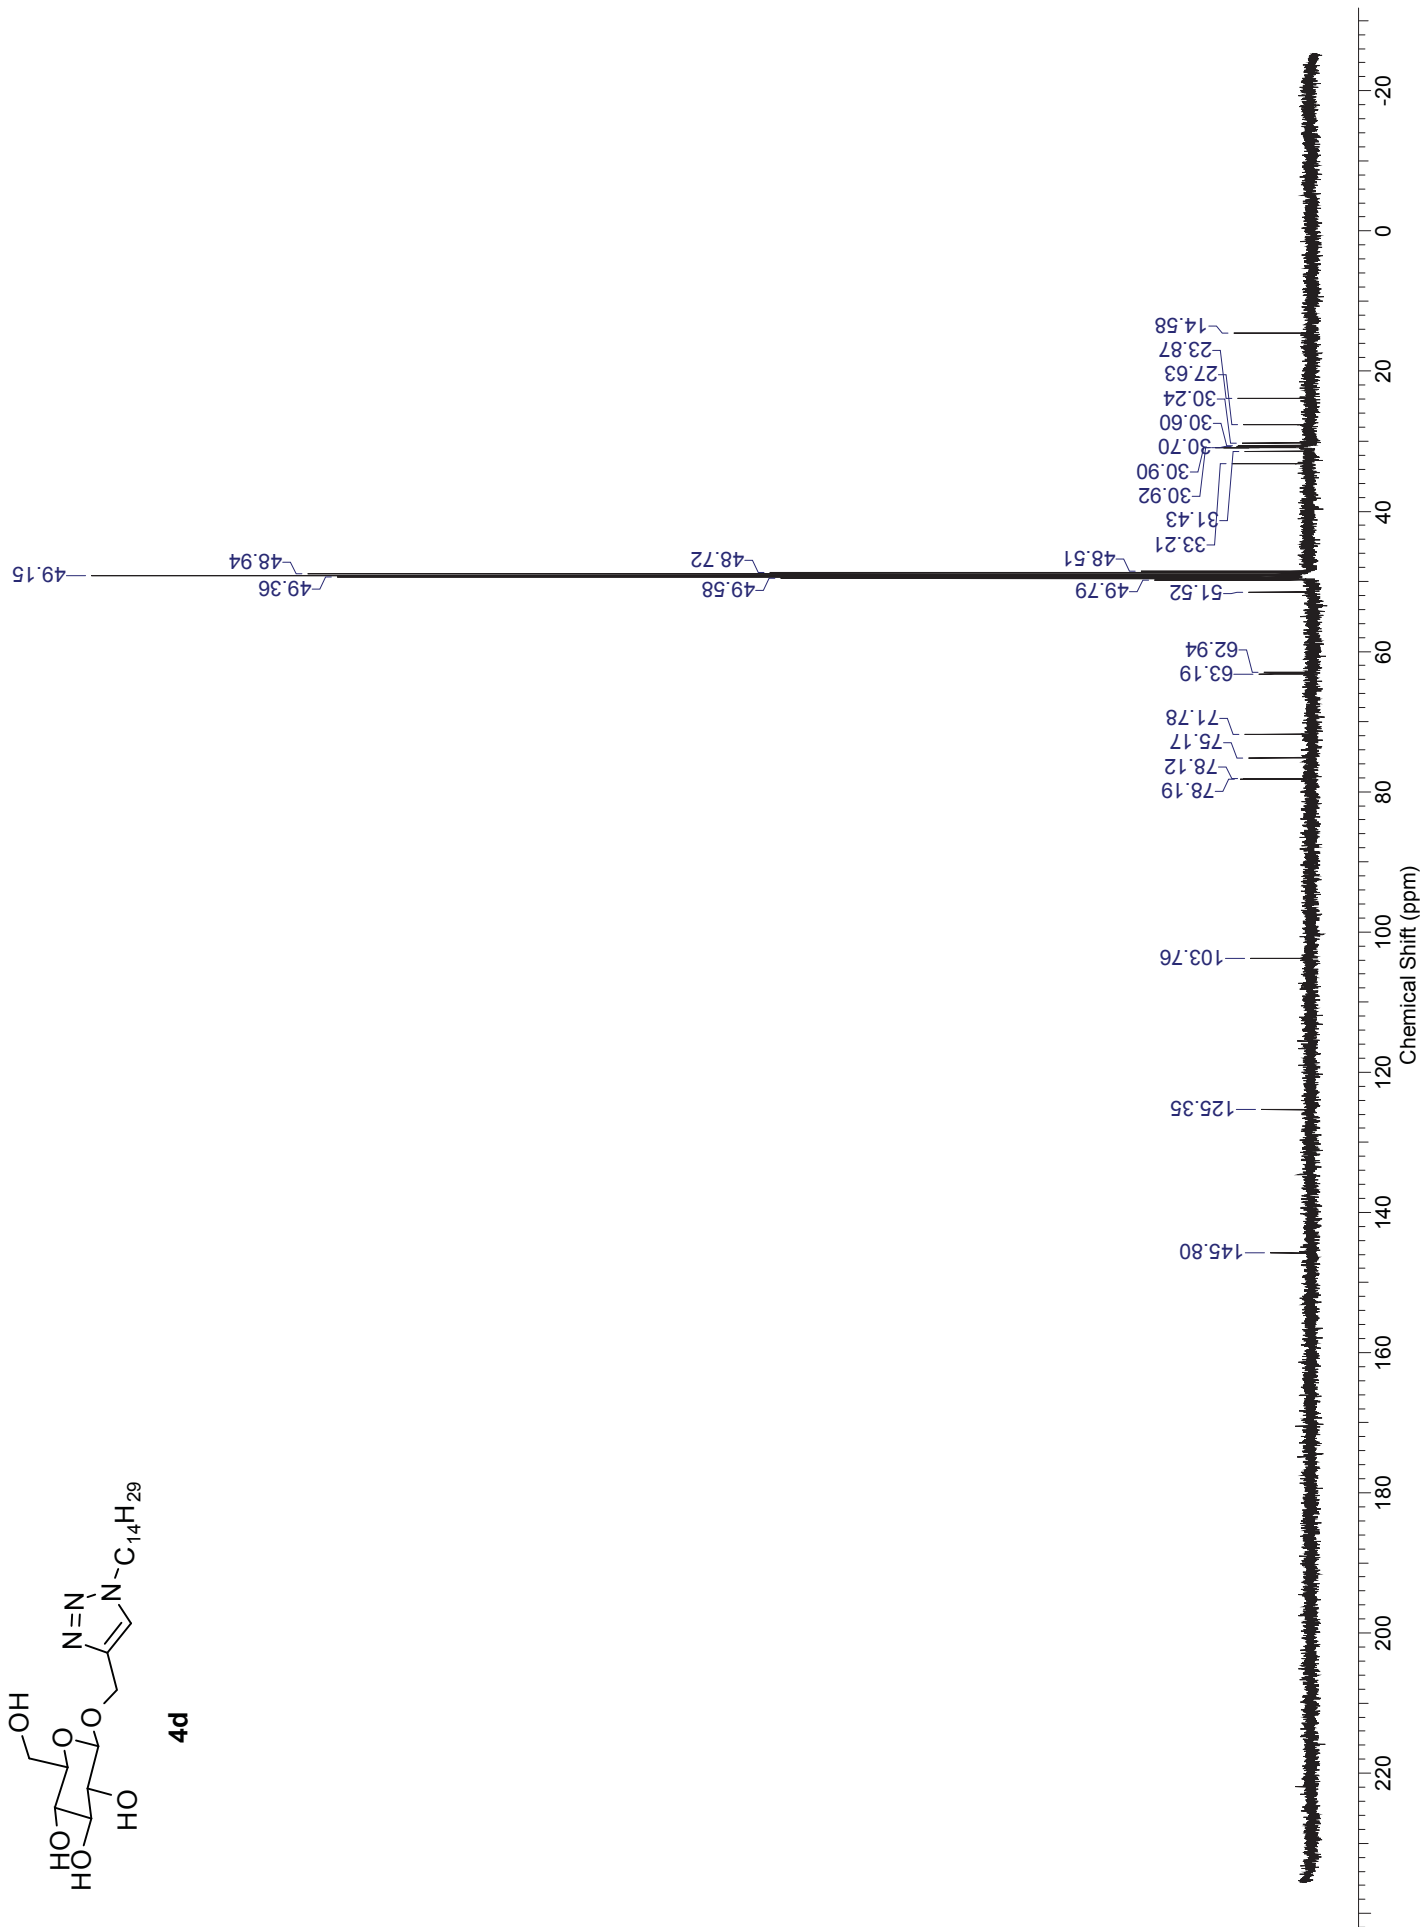

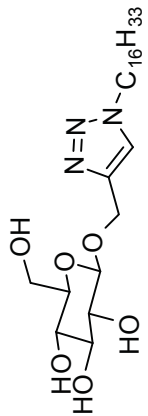

**4e**

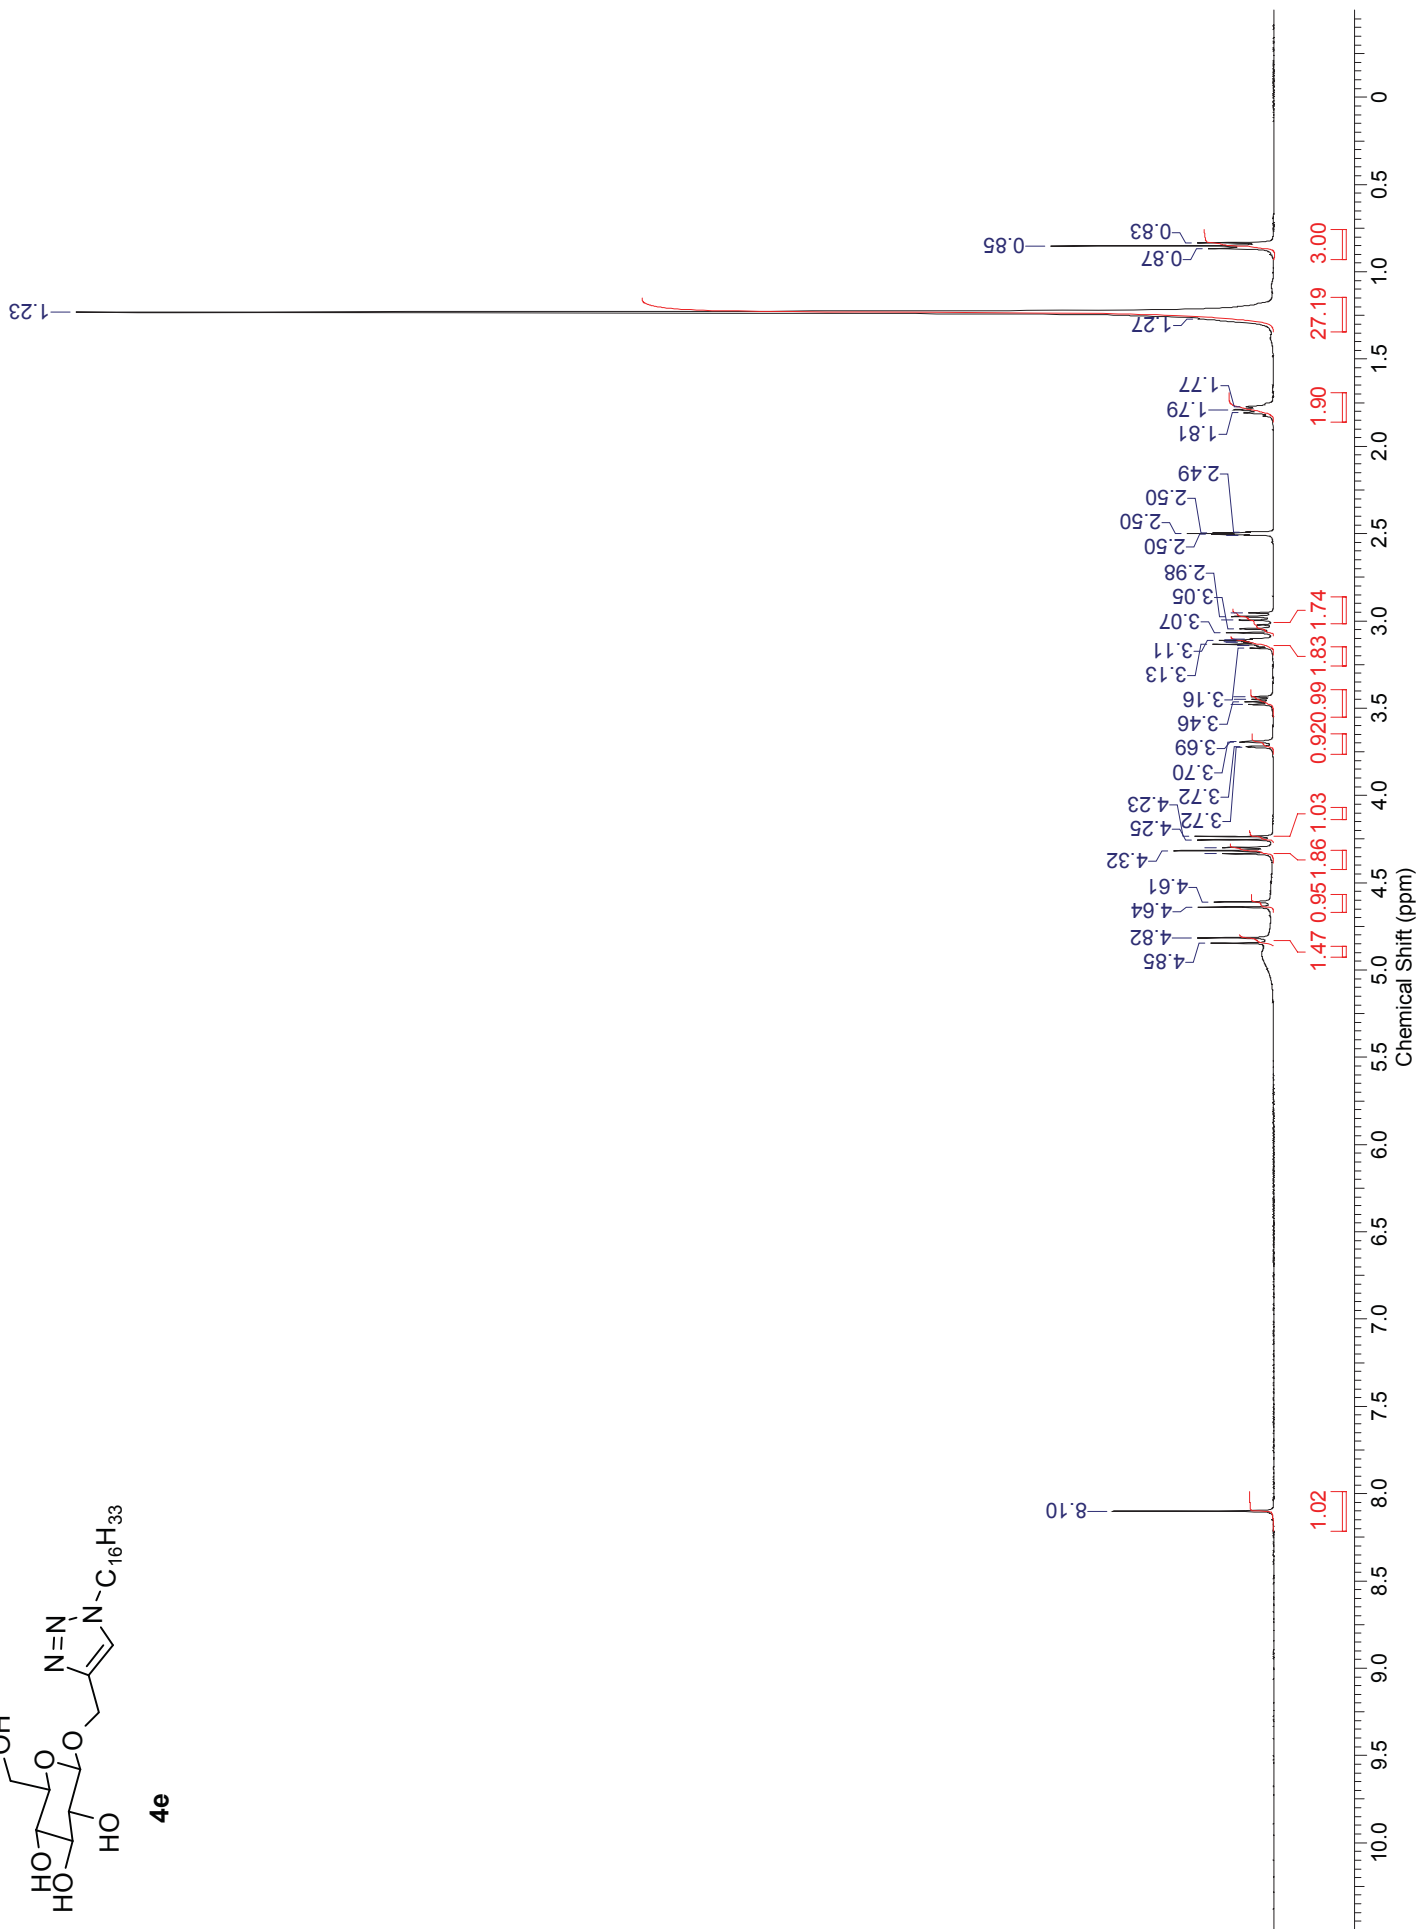

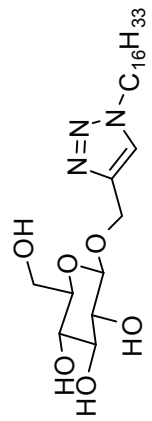

**4e**

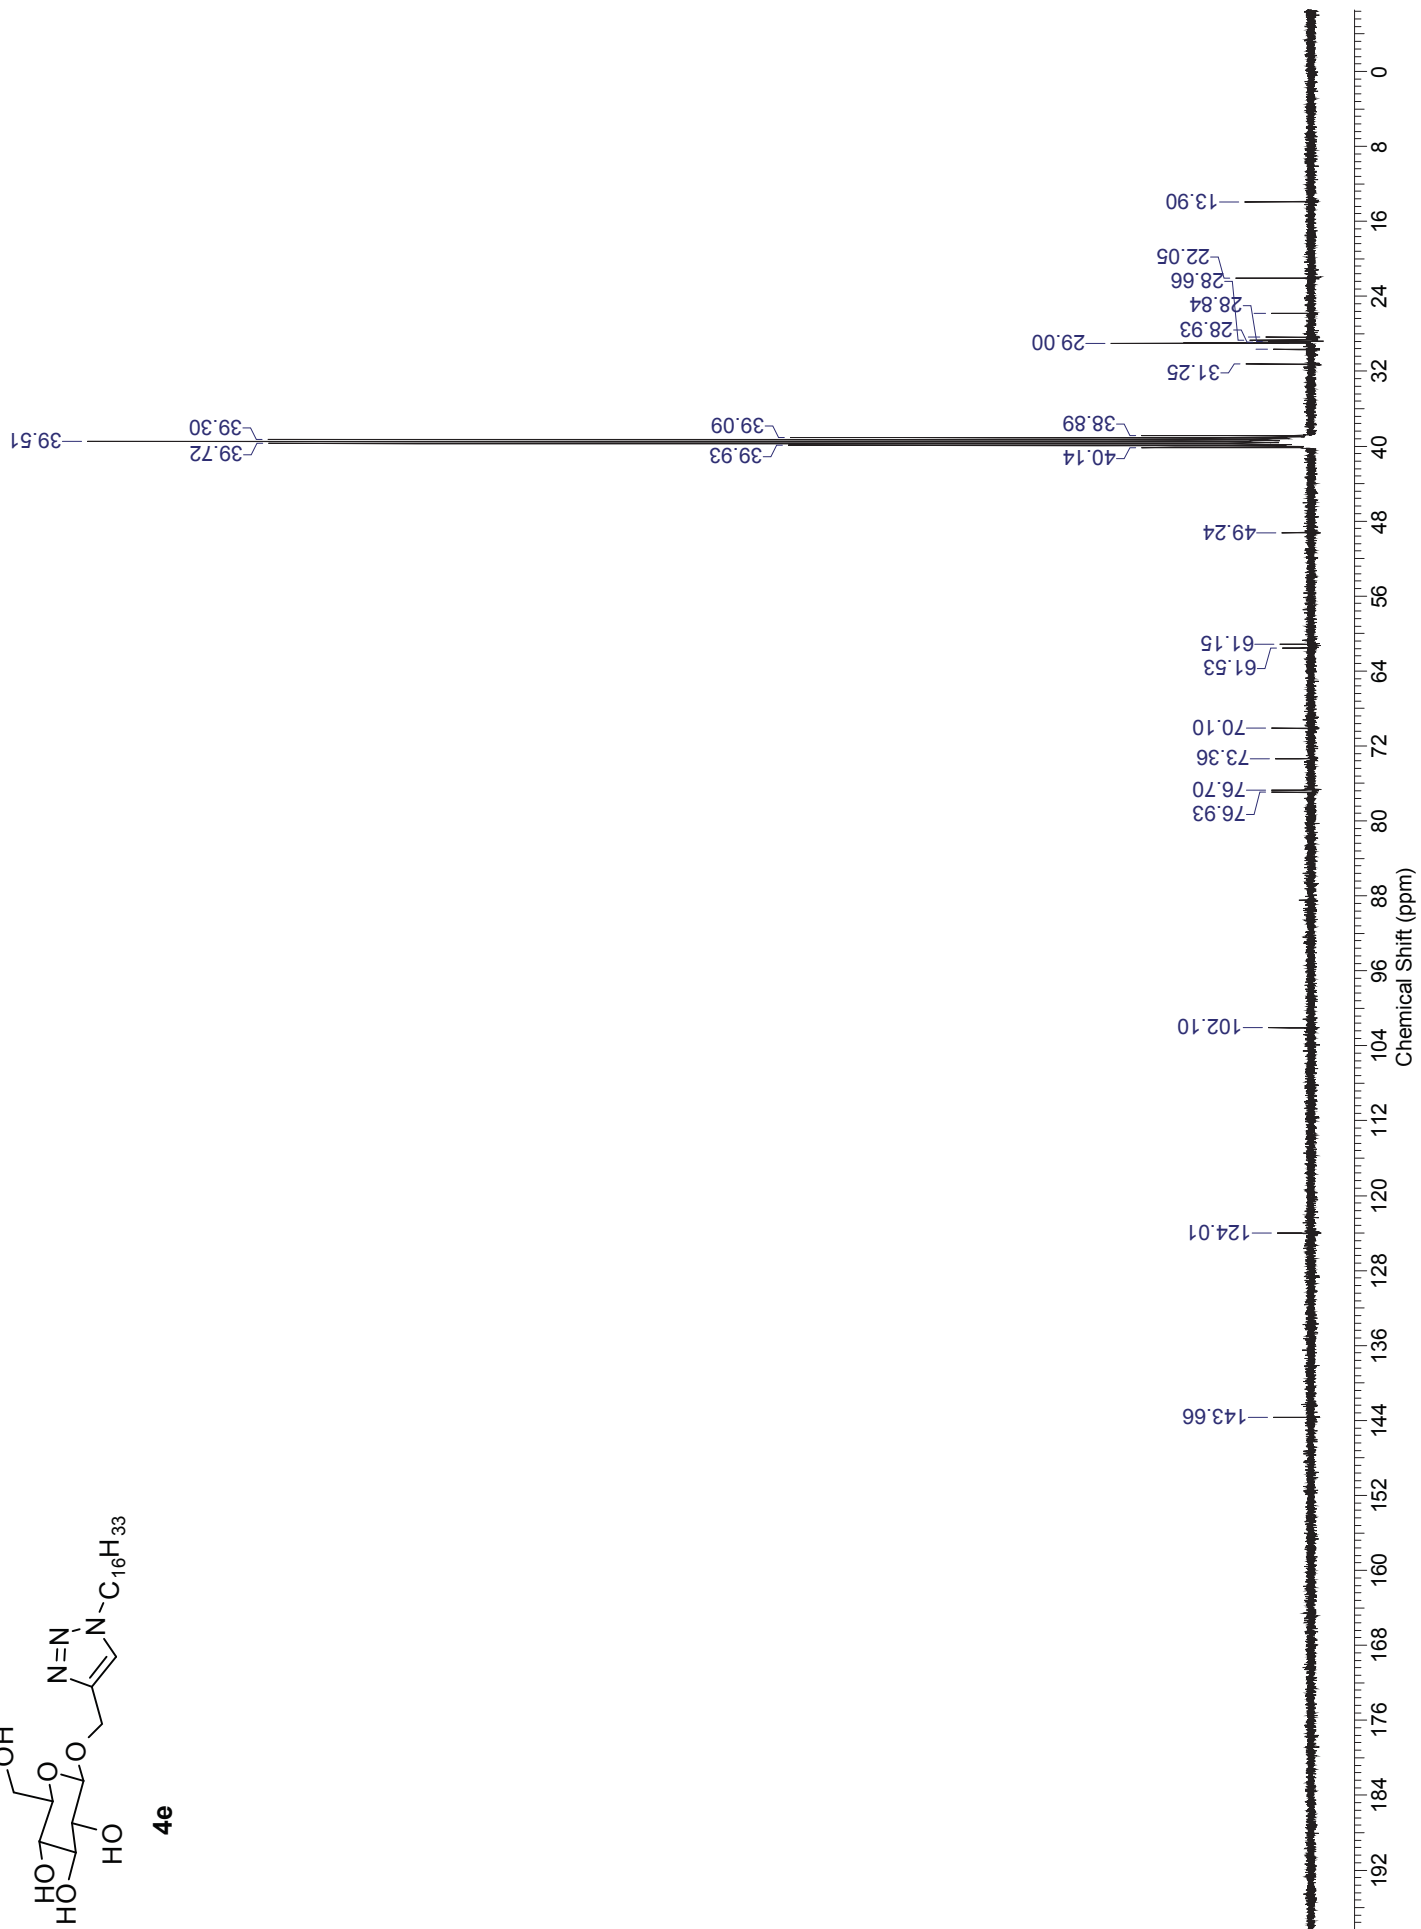



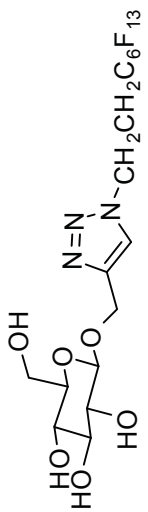

4f

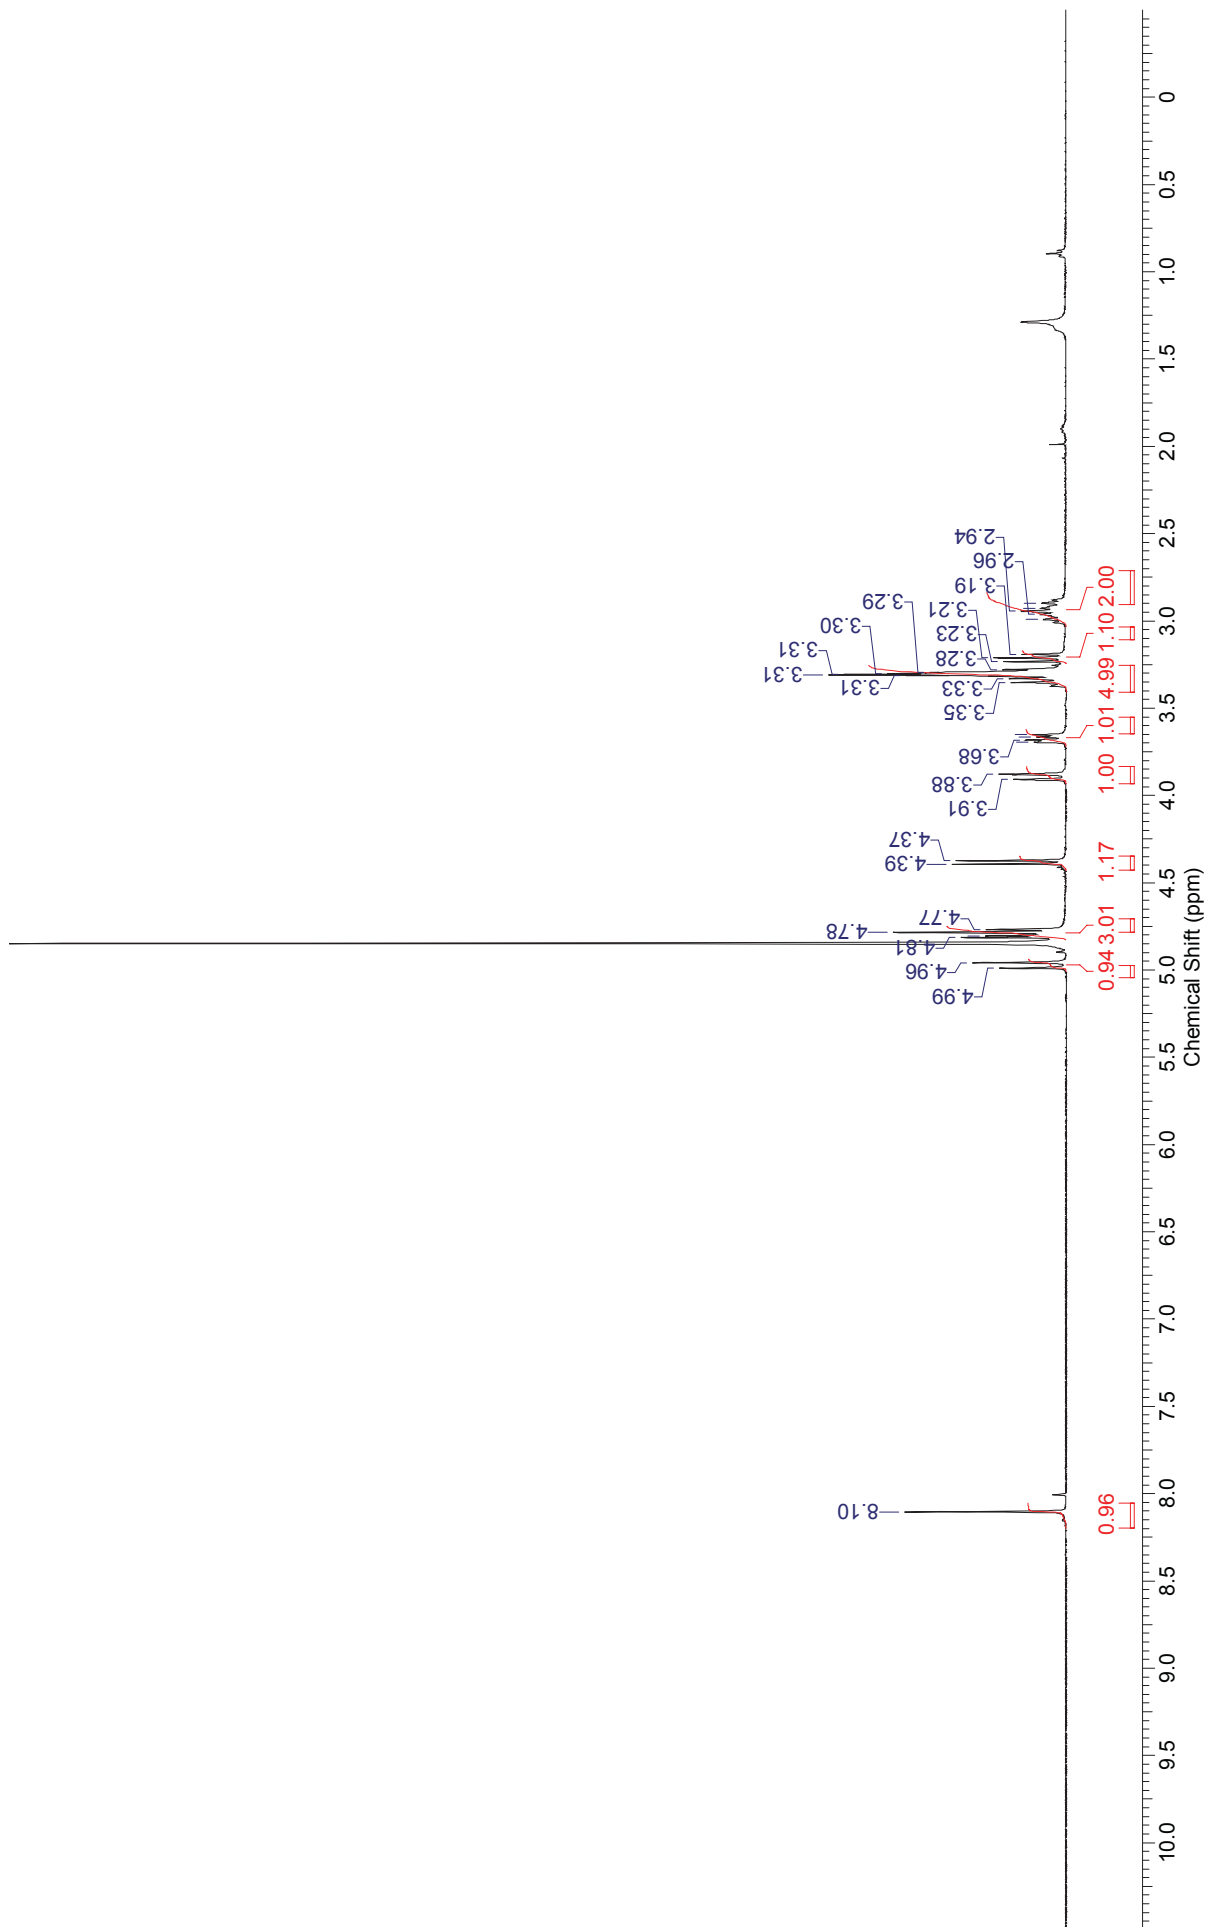

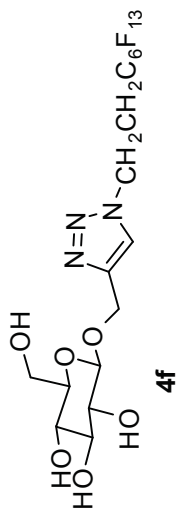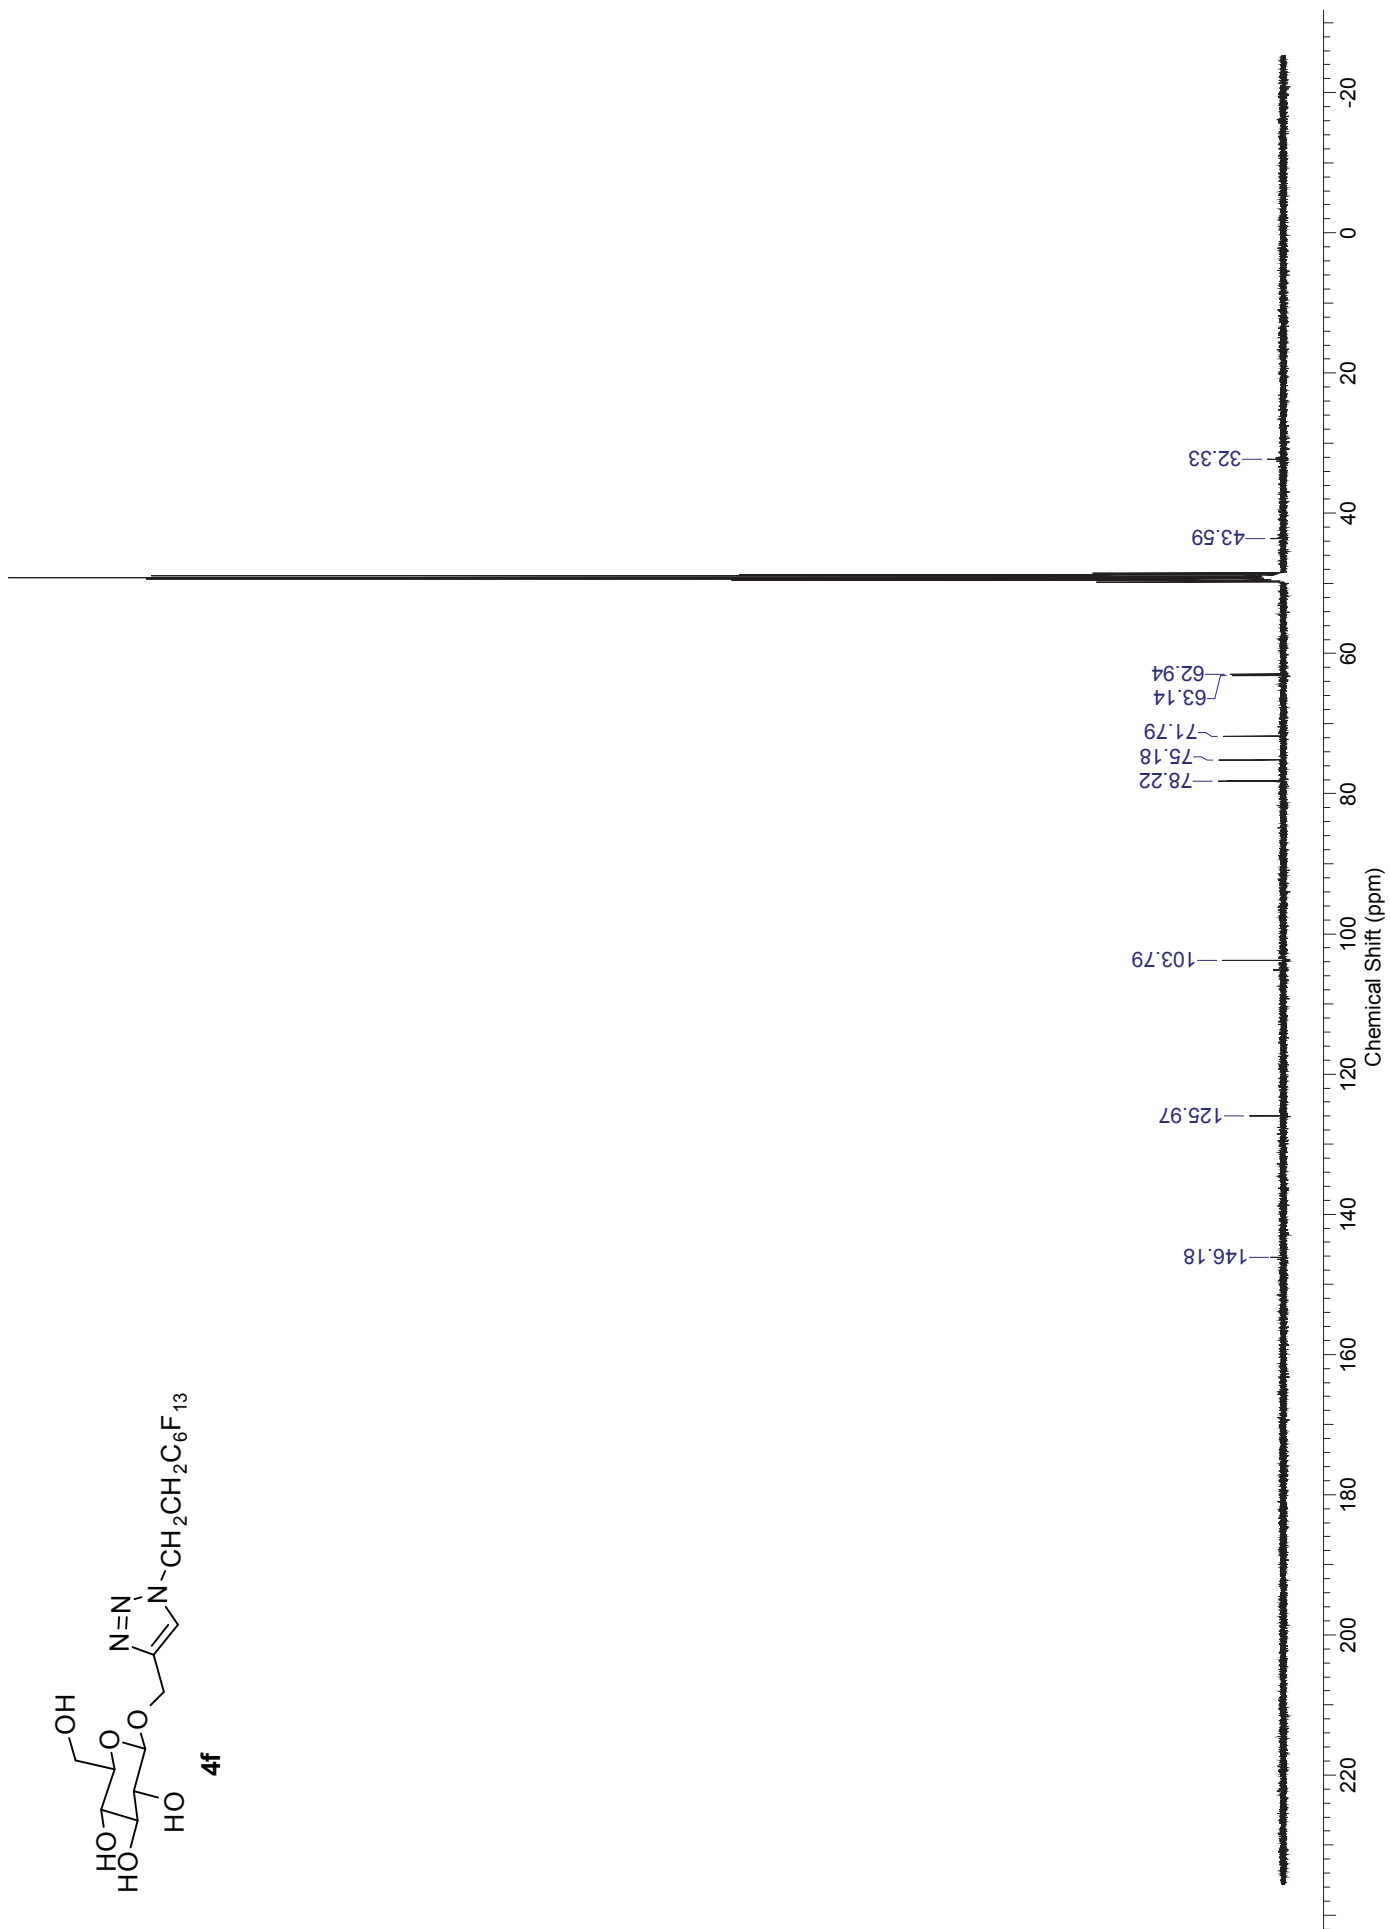

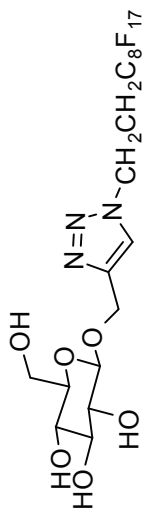

4g

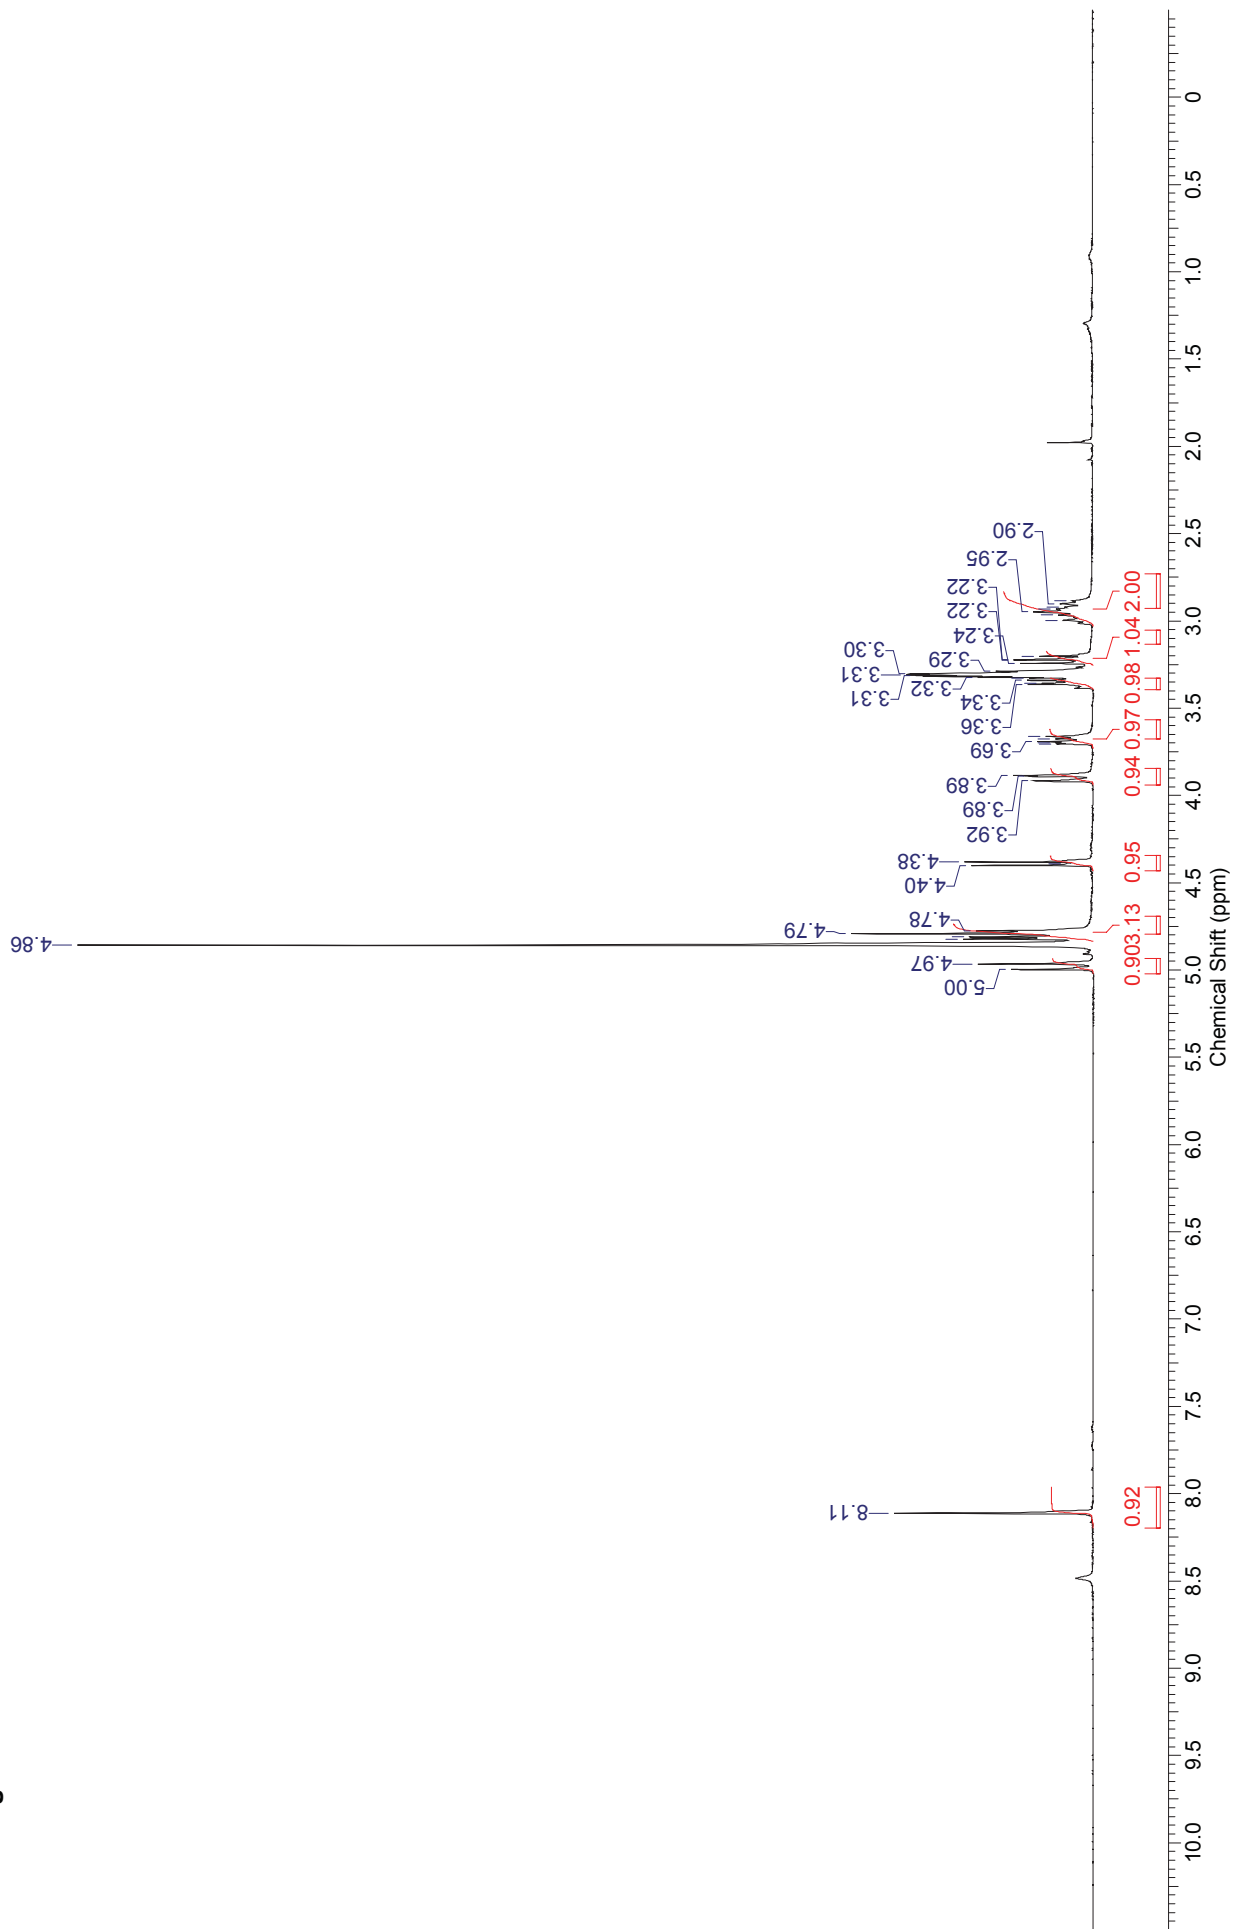

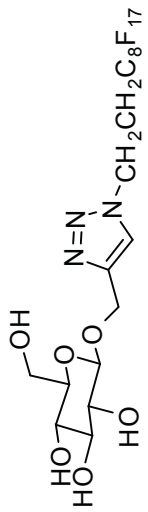

4g

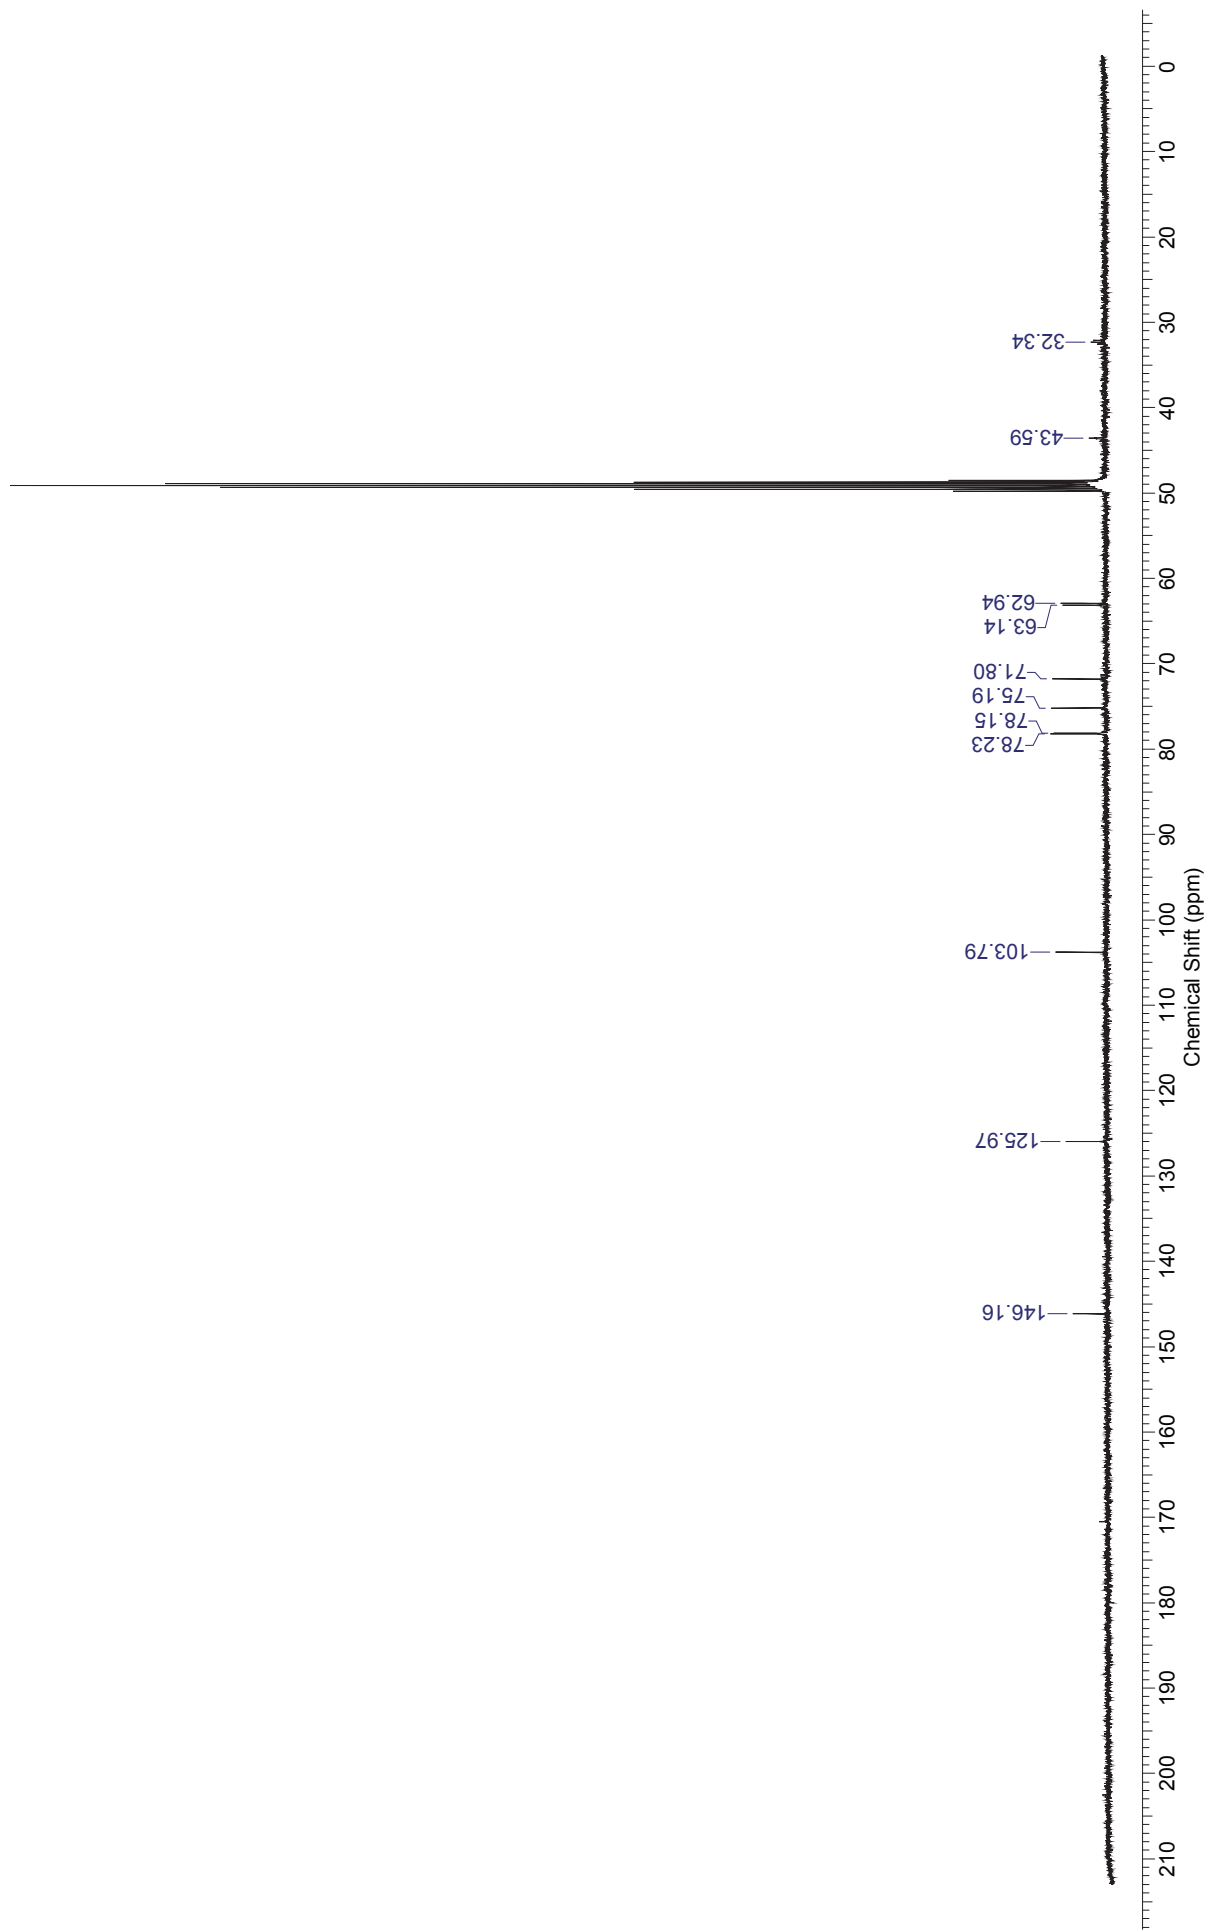

Supplement: 13065_2014_72_MOESM1_ESM.pdf [file 13065_2014_72_MOESM1_ESM.pdf]
